# Supplementary material for: Synthesis of the C1–C25 southern domain of spirastrellolides B and F
Source: Royal Society of Chemistry journal article supplement (doi:10.1039/c3ob41345d), 2013-01-01

## SUPPORTING INFORMATION

# Synthesis of the C1-C25 Southern Domain of Spirastrellolides B and F

*Gowravaram Sabitha,\* Allu Senkara Rao and J. S. Yadav*

*Division of Natural Products Chemistry, CSIR-Indian Institute of Chemical  
Technology, Hyderabad, India 500 007*

E-mail: [gowravaramsr@yahoo.com](mailto:gowravaramsr@yahoo.com), [sabitha@iict.res.in](mailto:sabitha@iict.res.in)

### CONTENTS

<sup>1</sup>H and <sup>13</sup>C NMR spectra for new compounds and intermediates S2 –S73

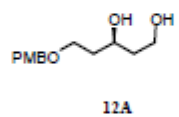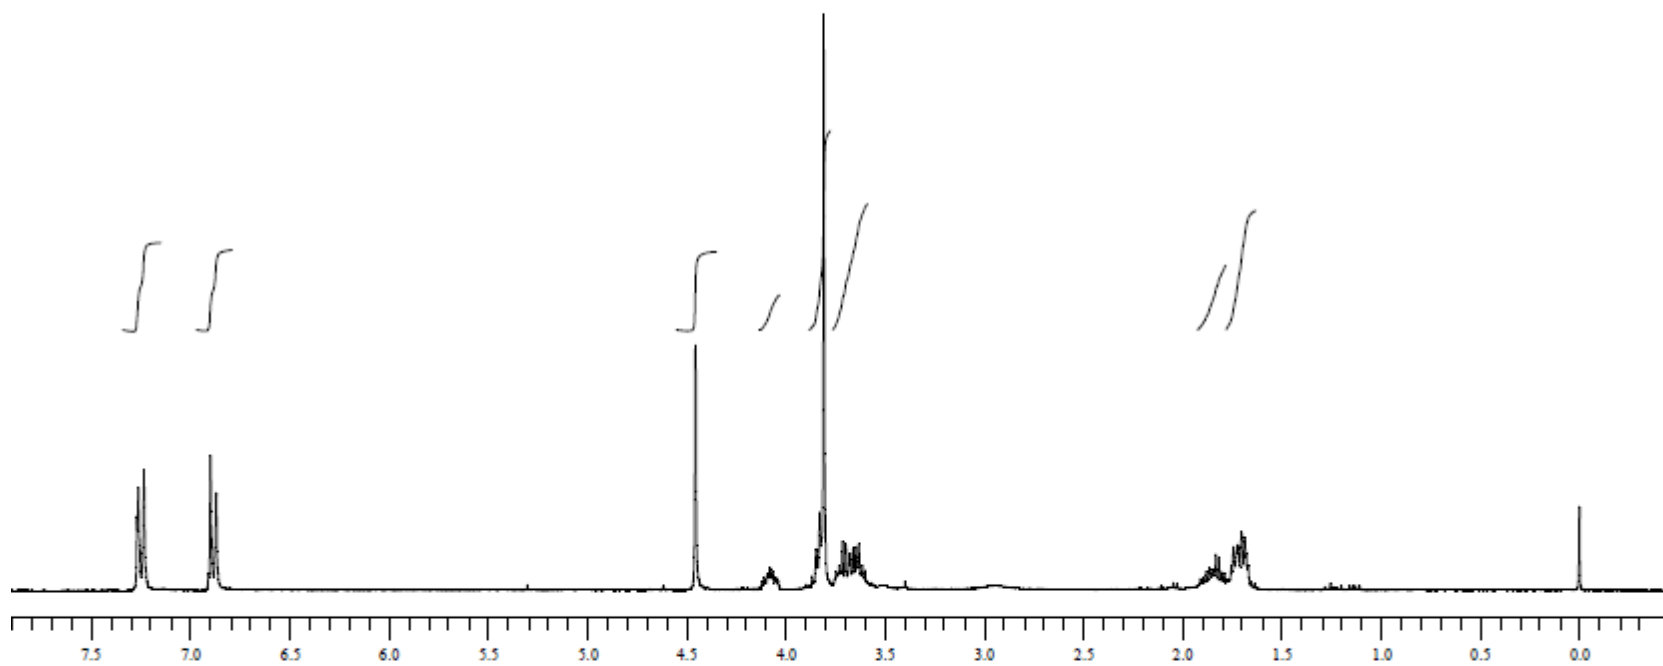

<sup>1</sup>H NMR SPECTRUM (300 MHz, CDCl<sub>3</sub>)

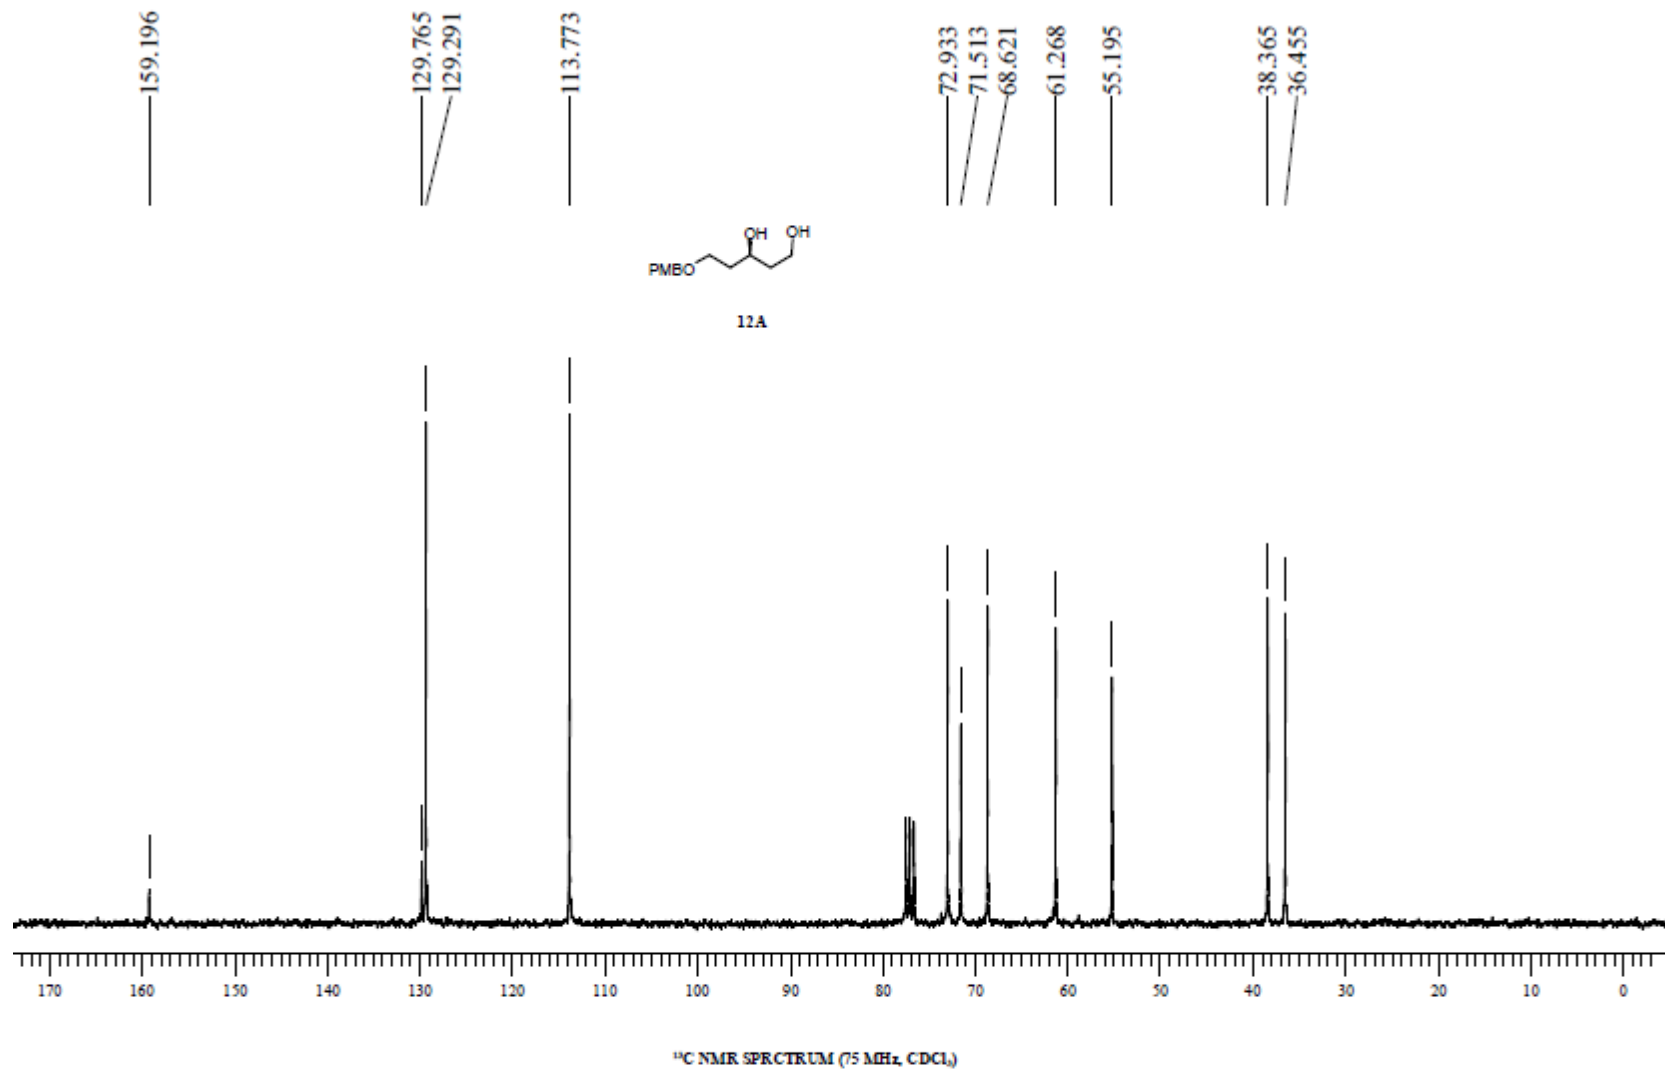

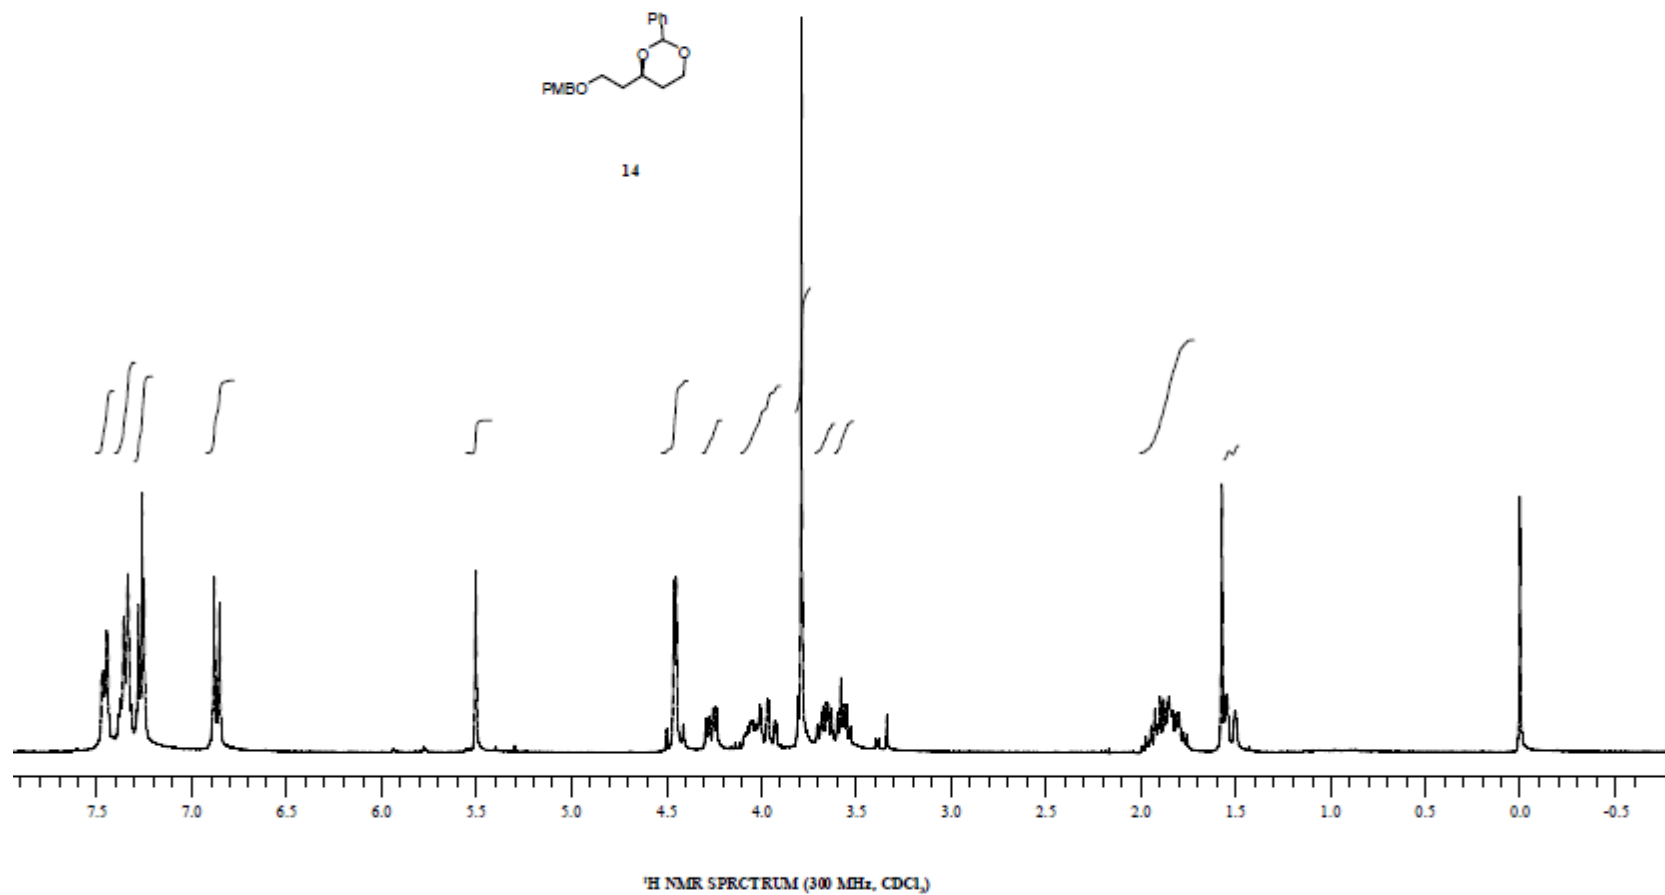

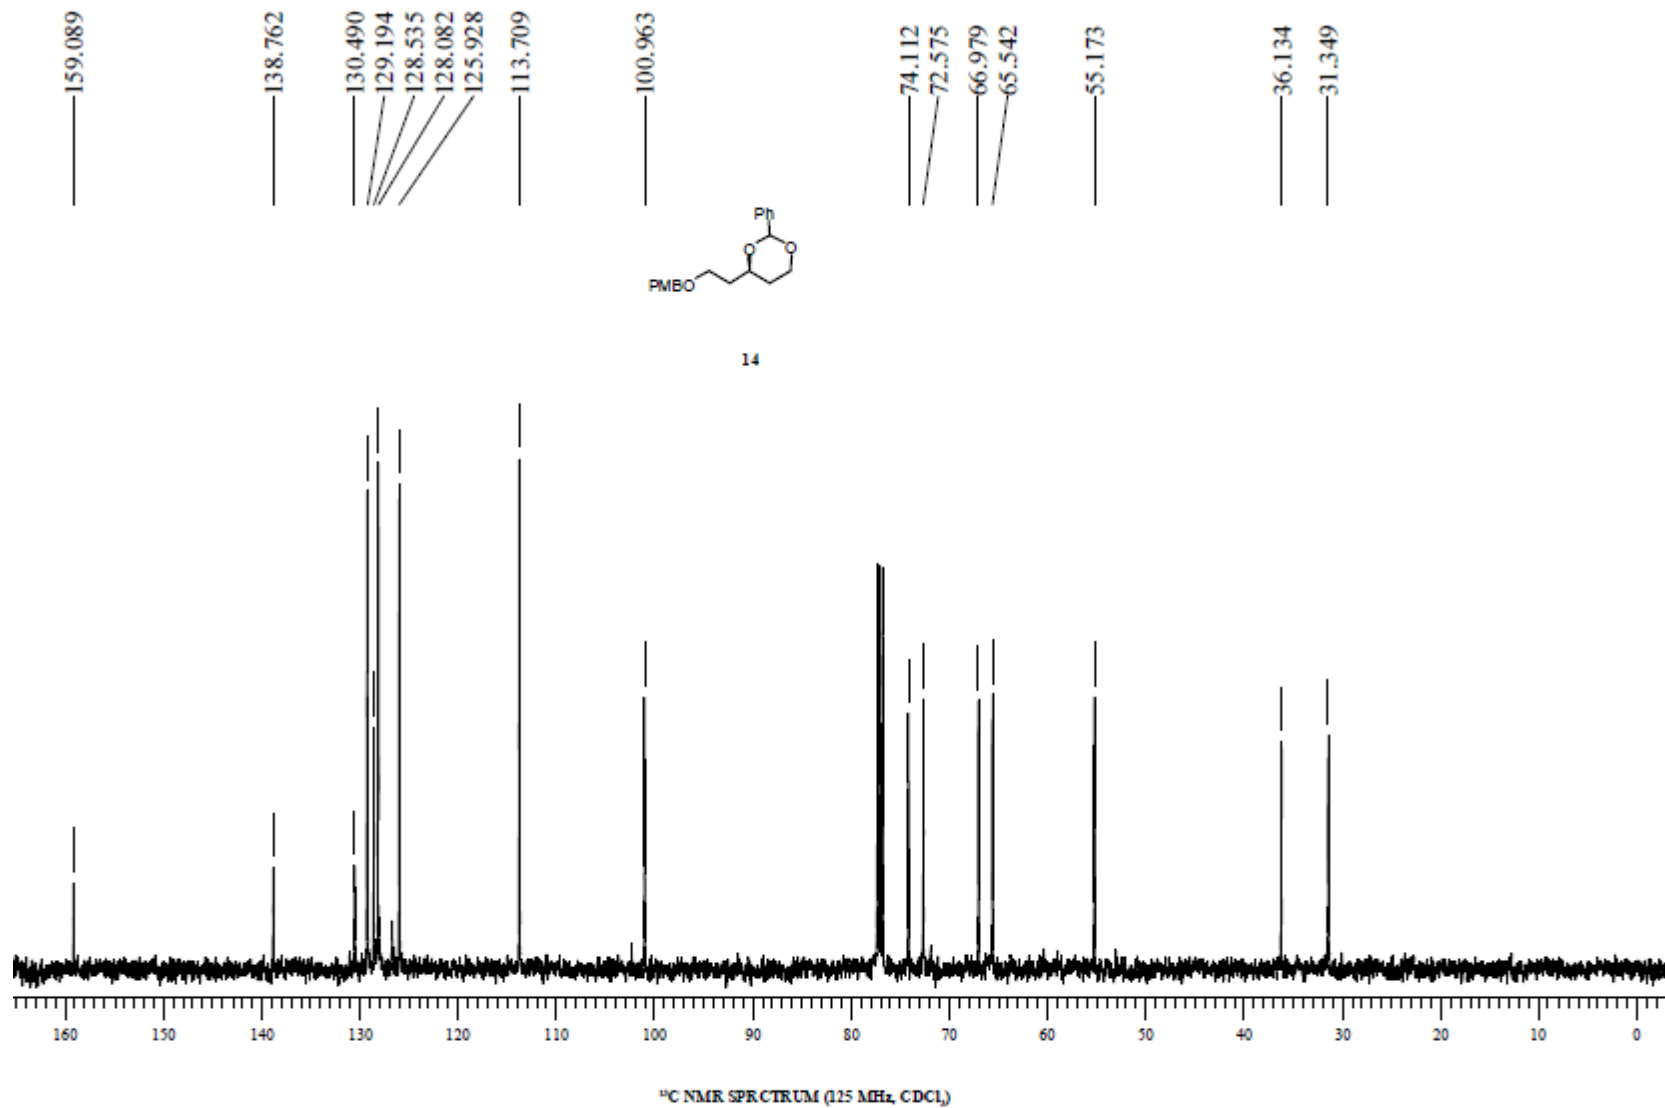

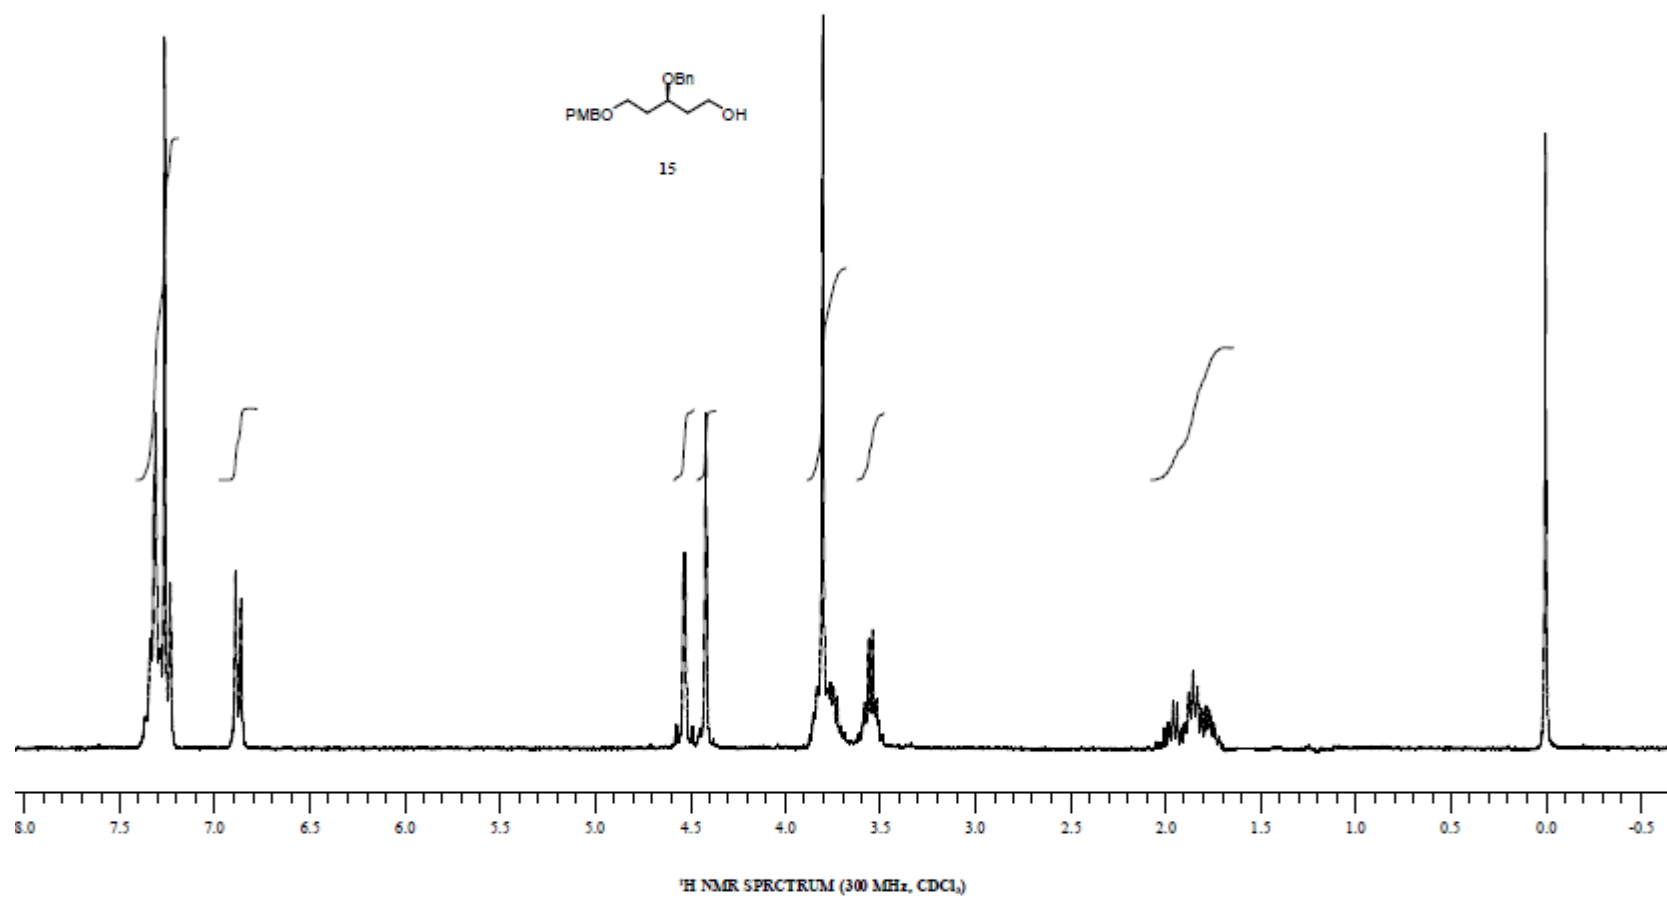

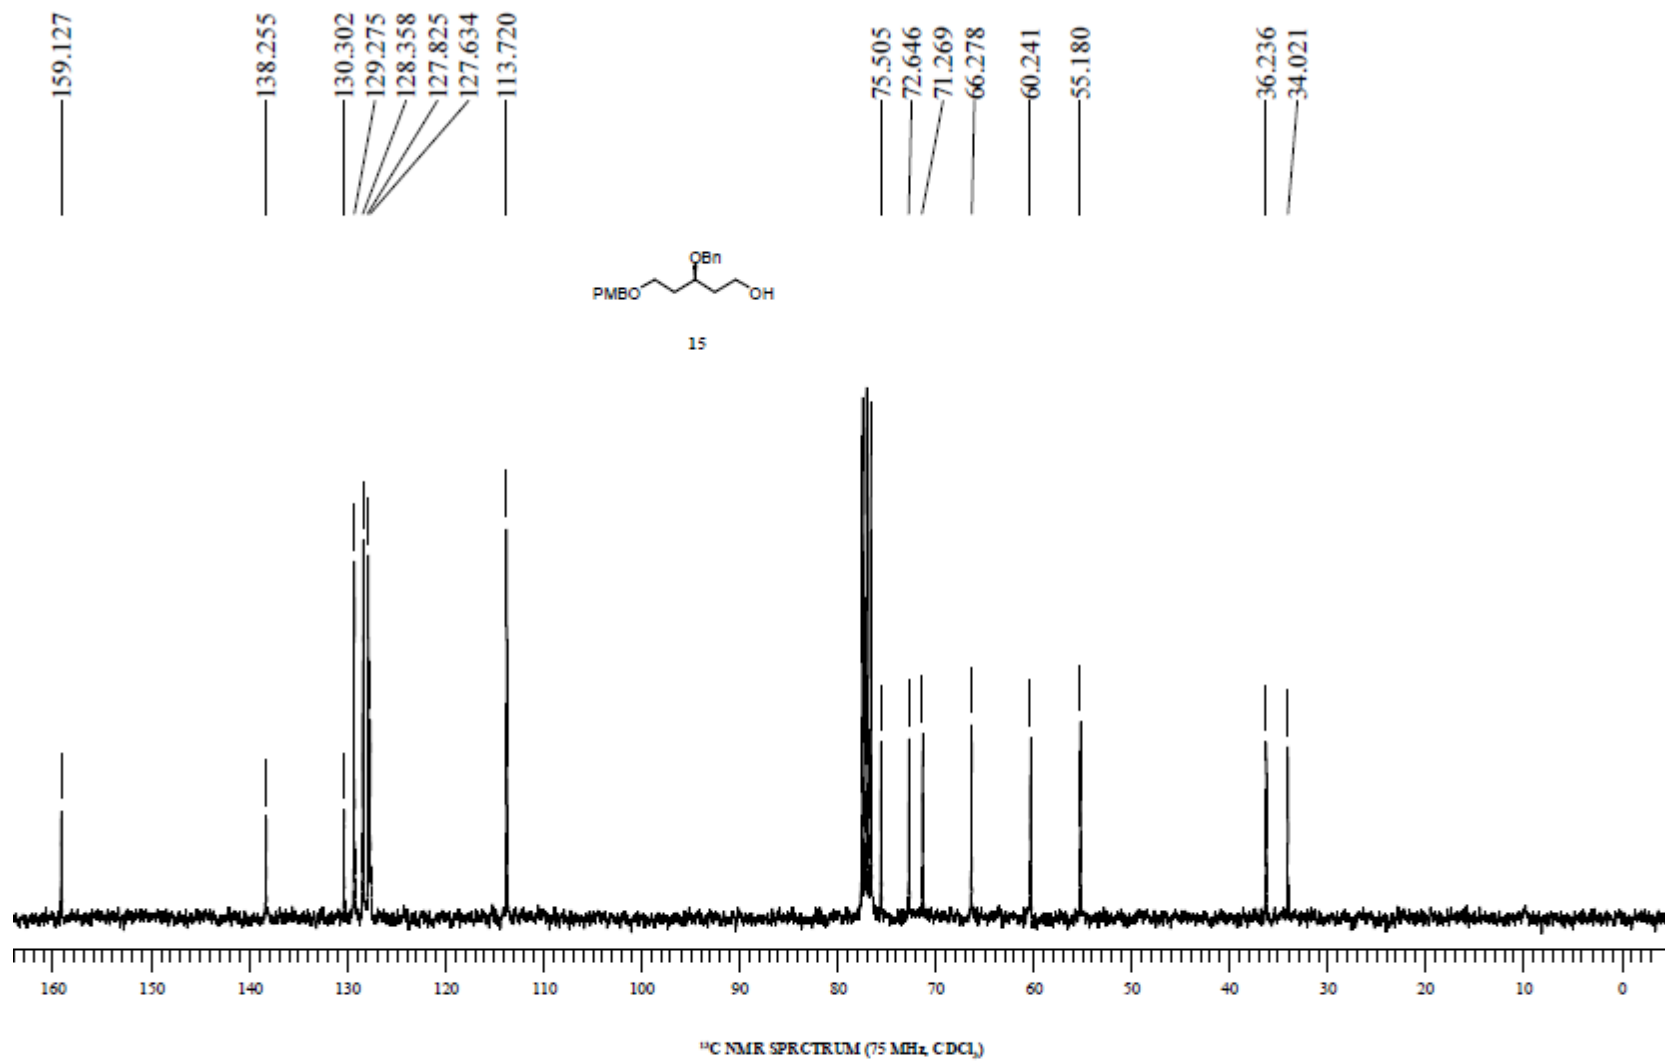

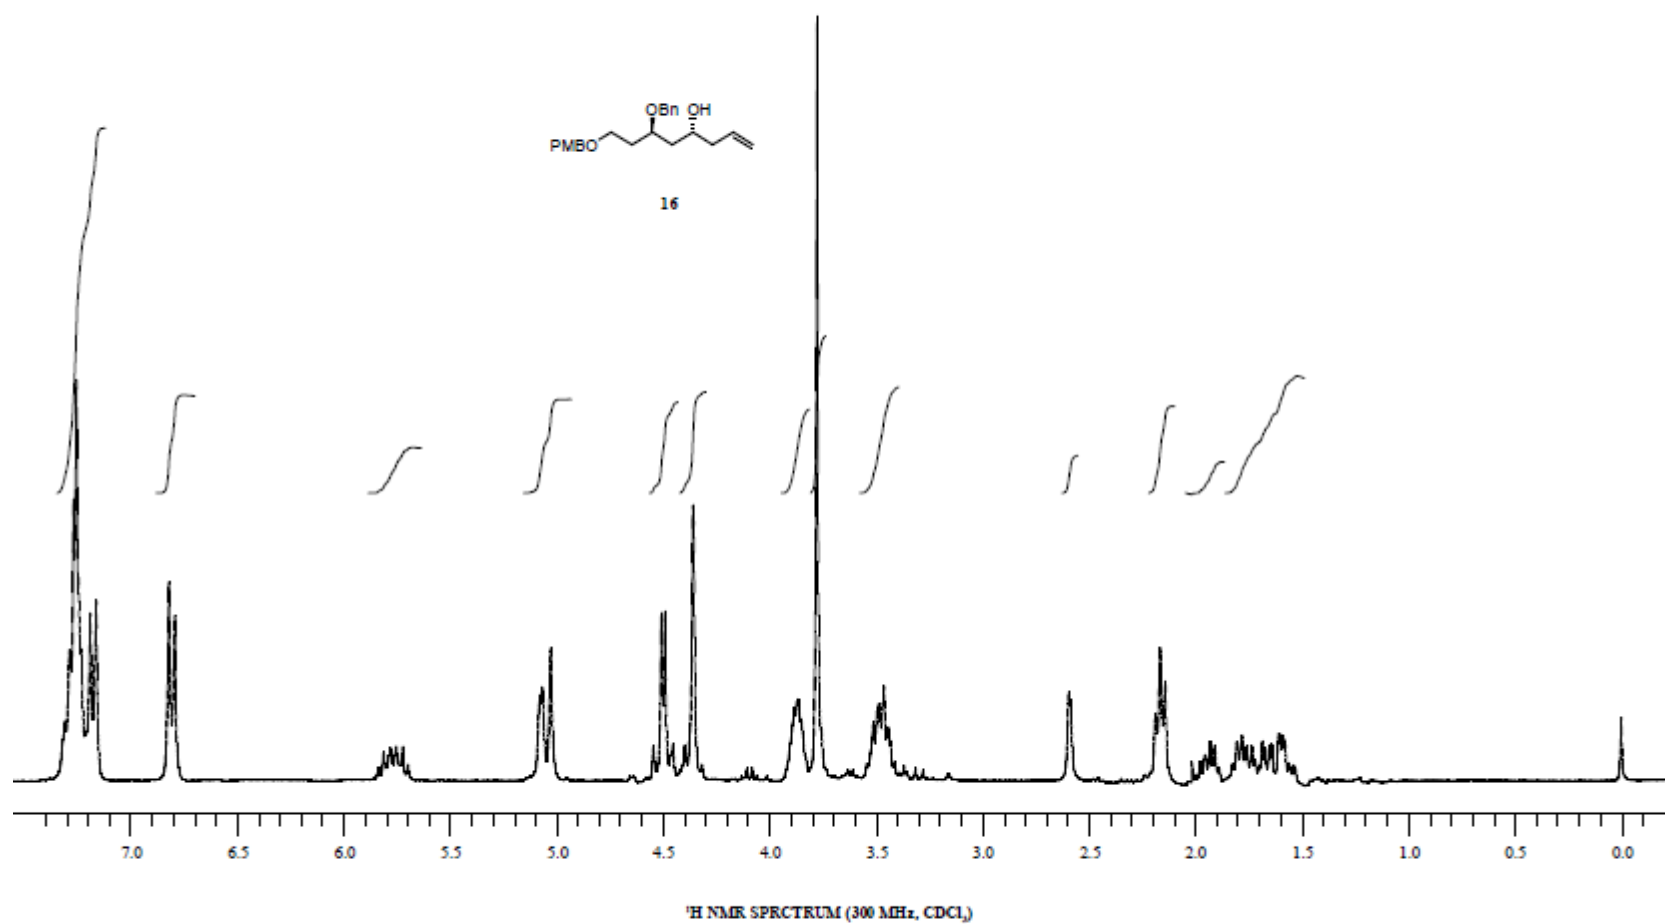



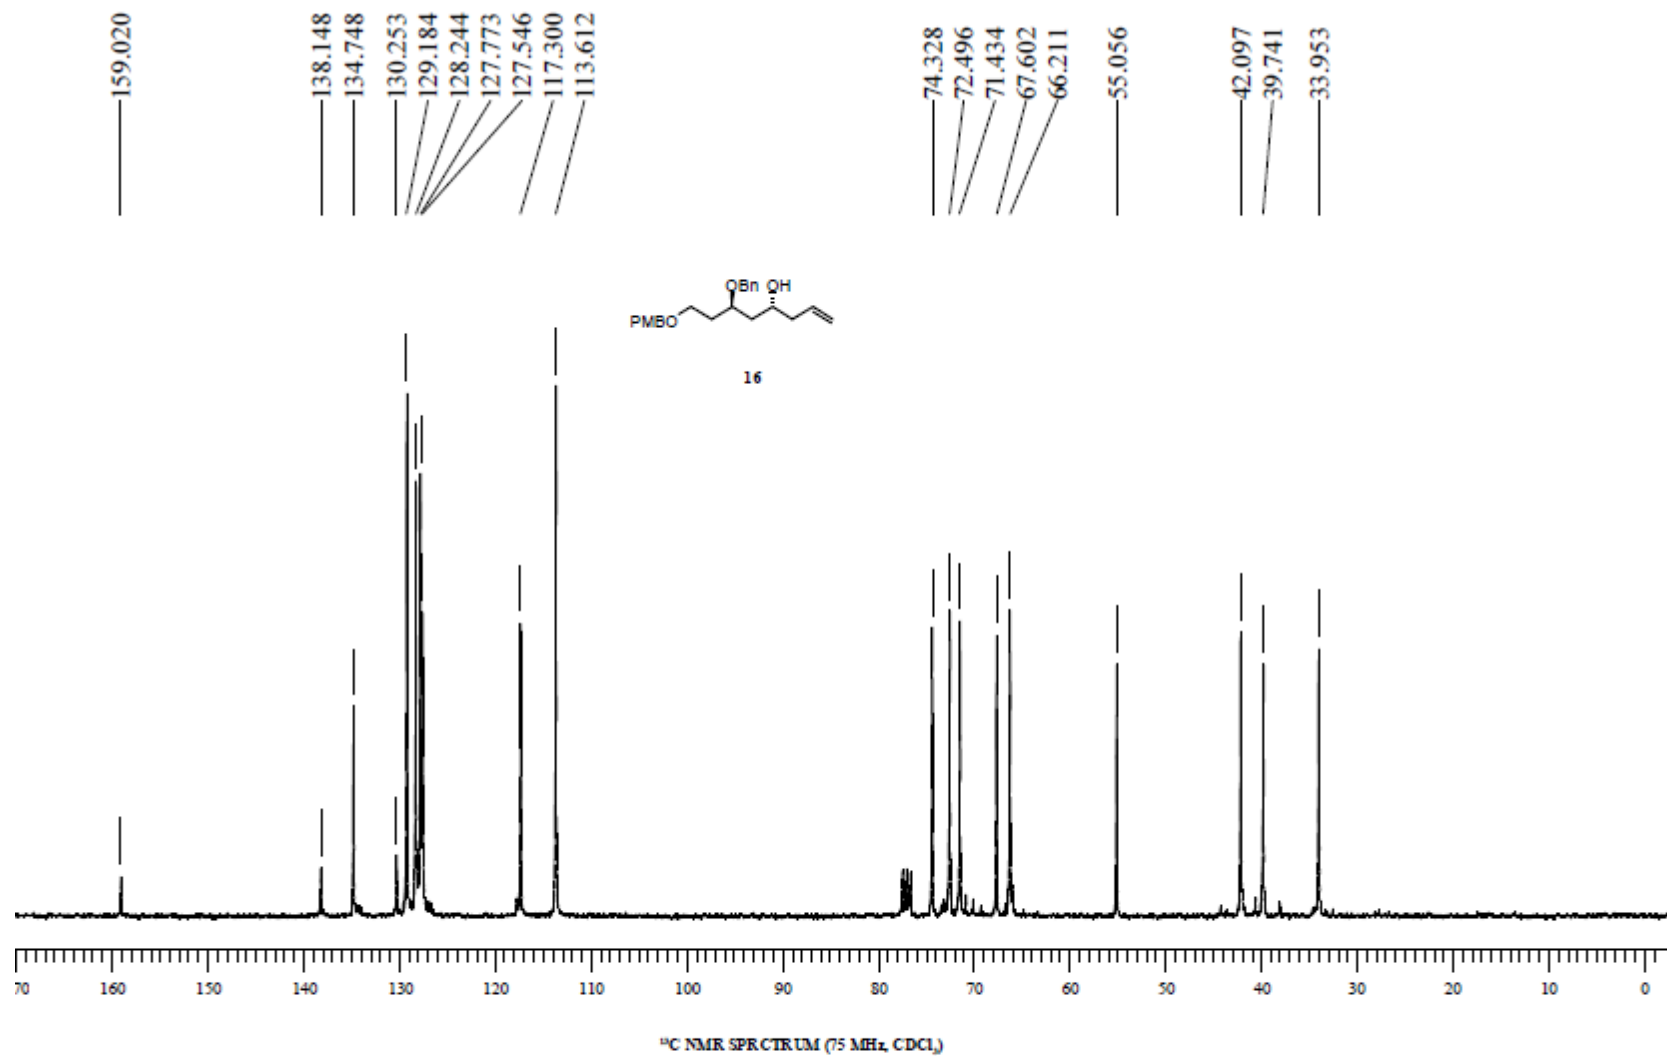

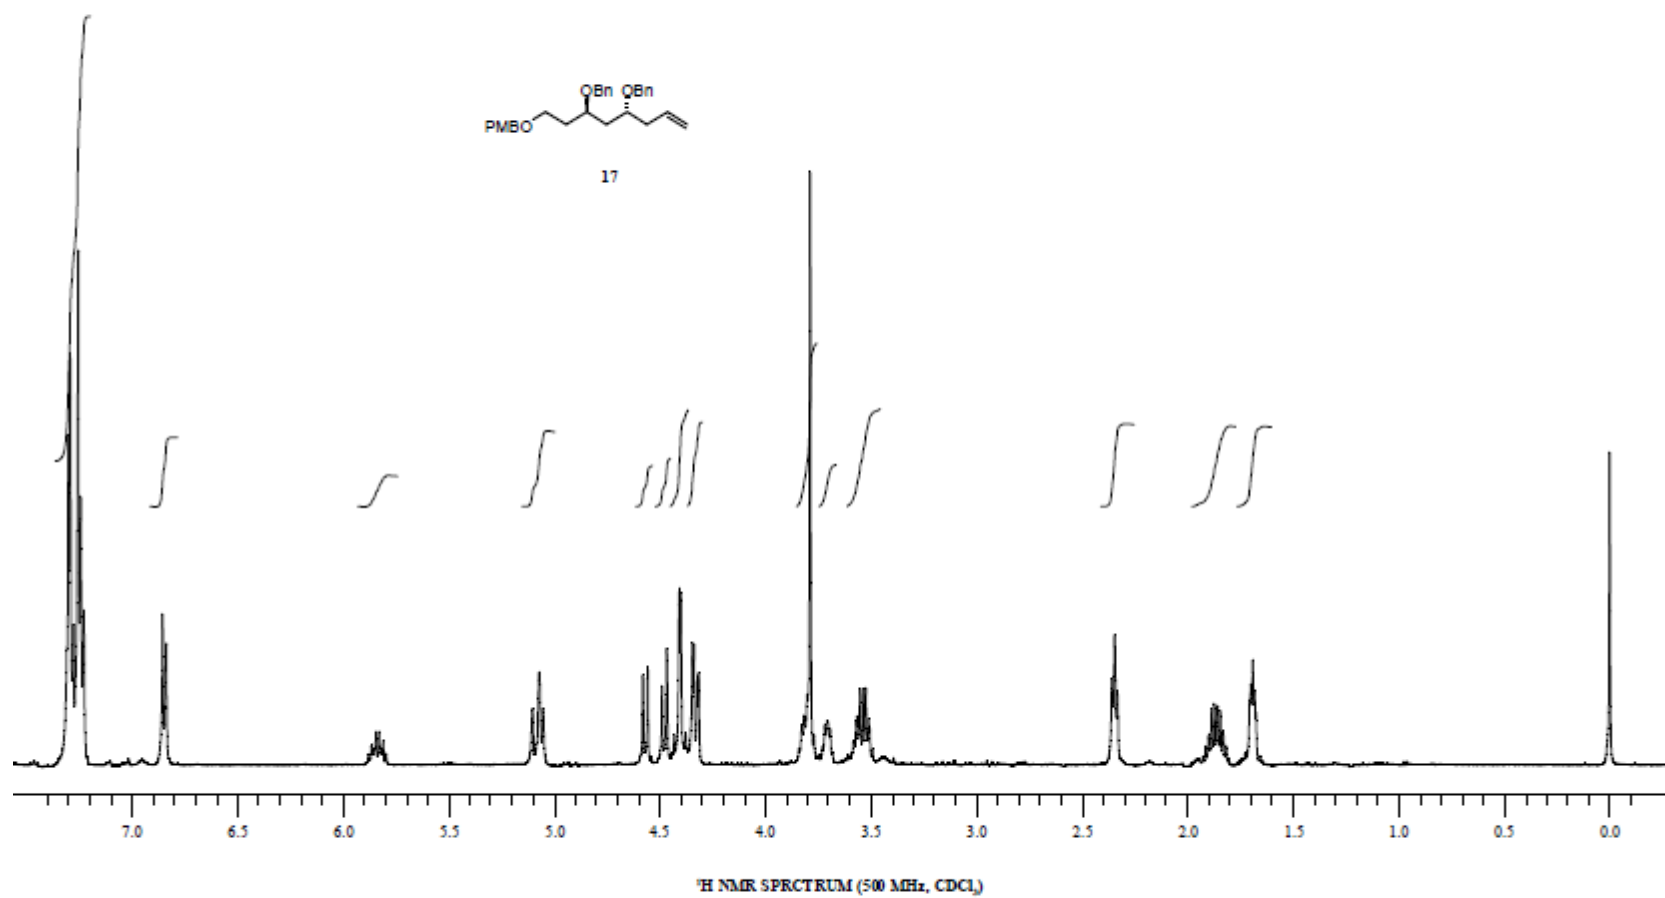

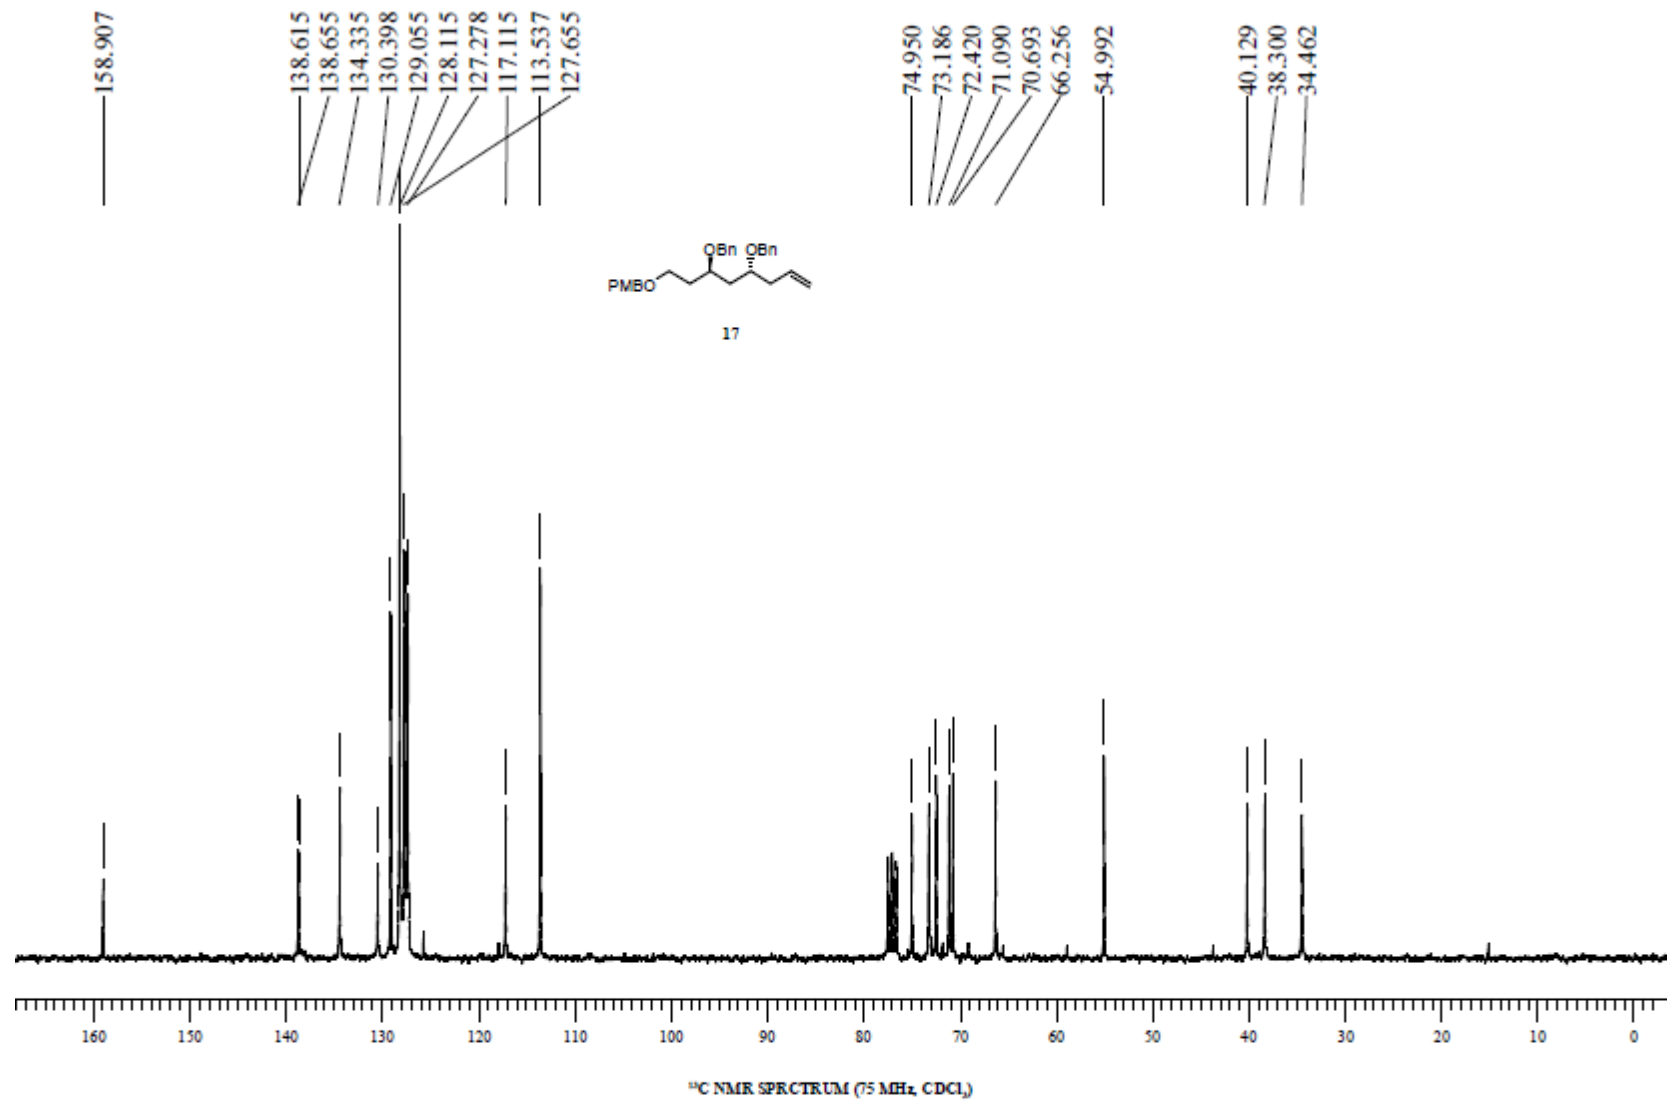

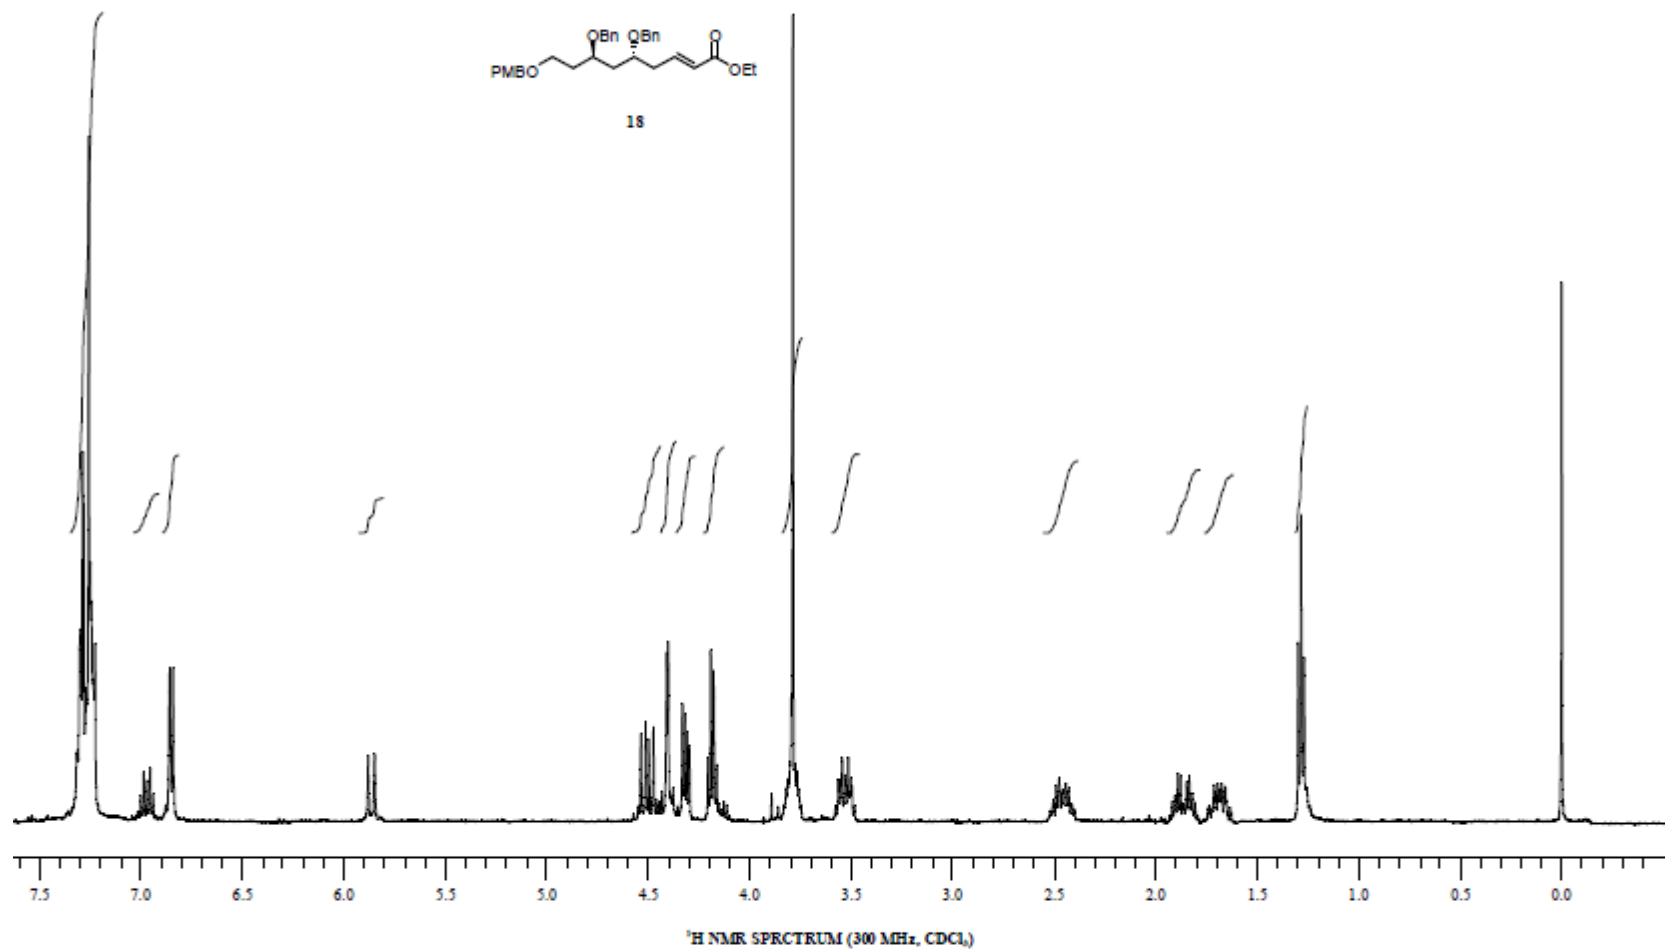

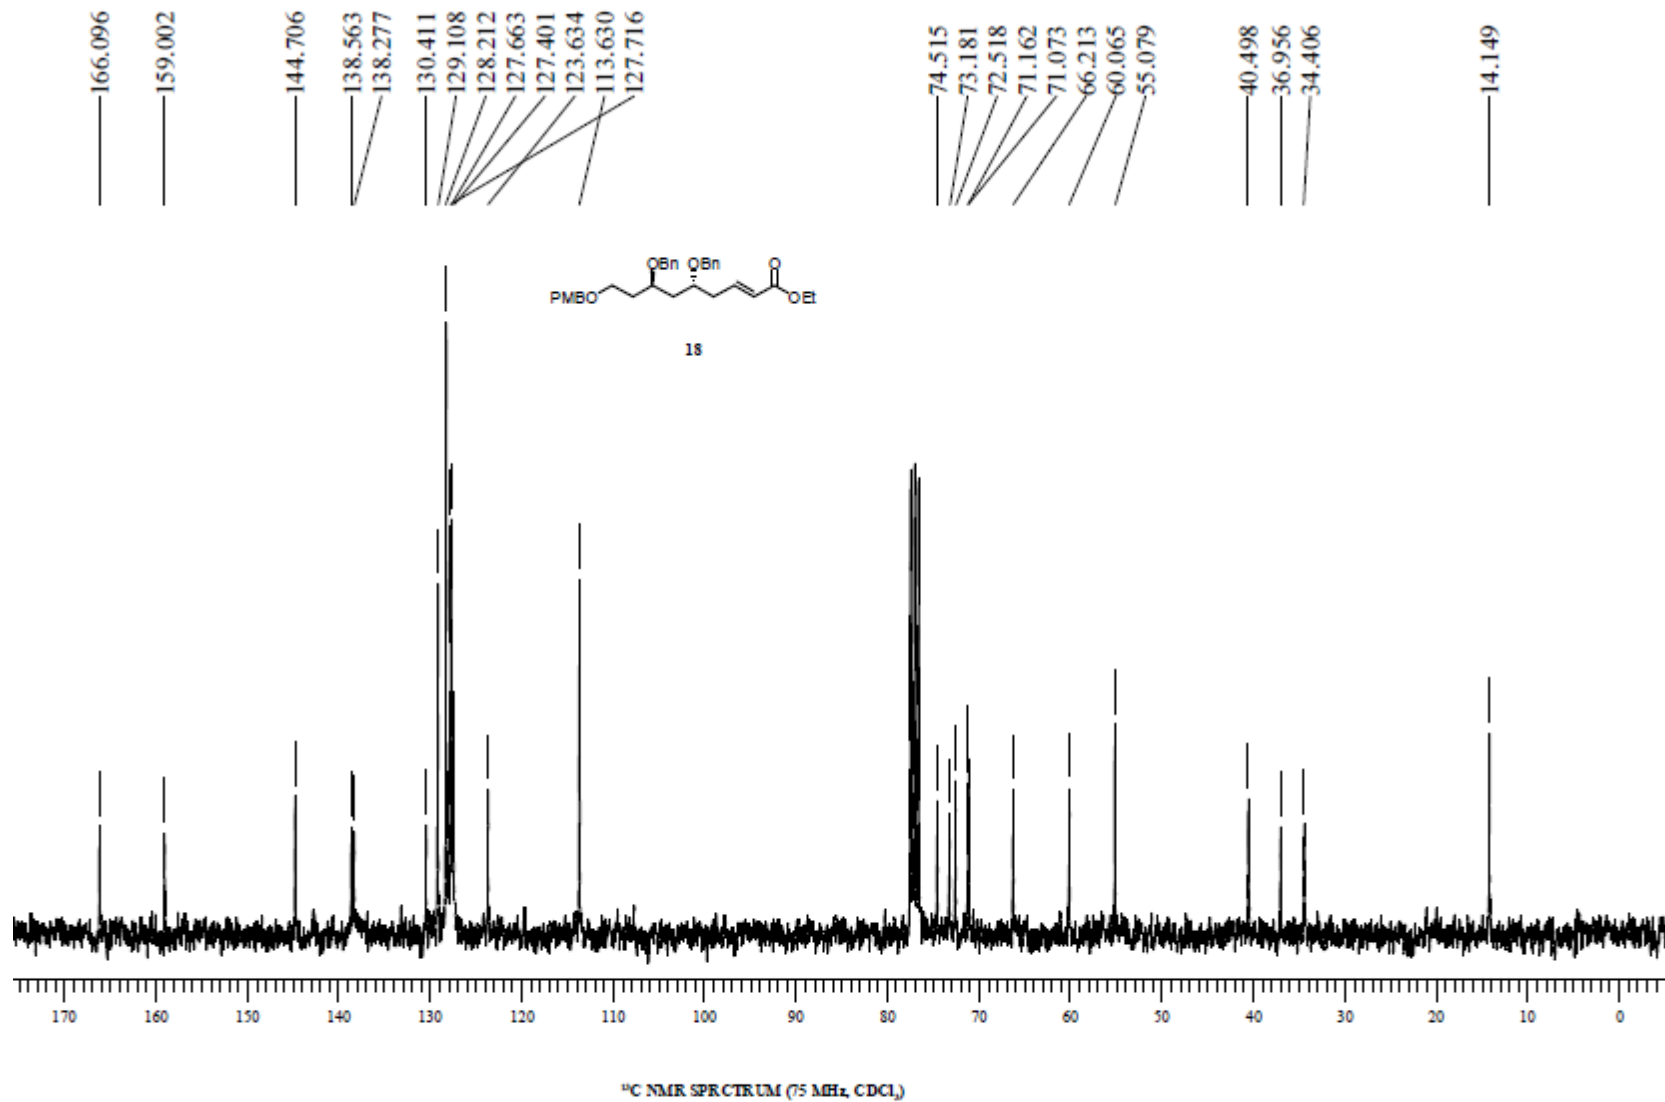

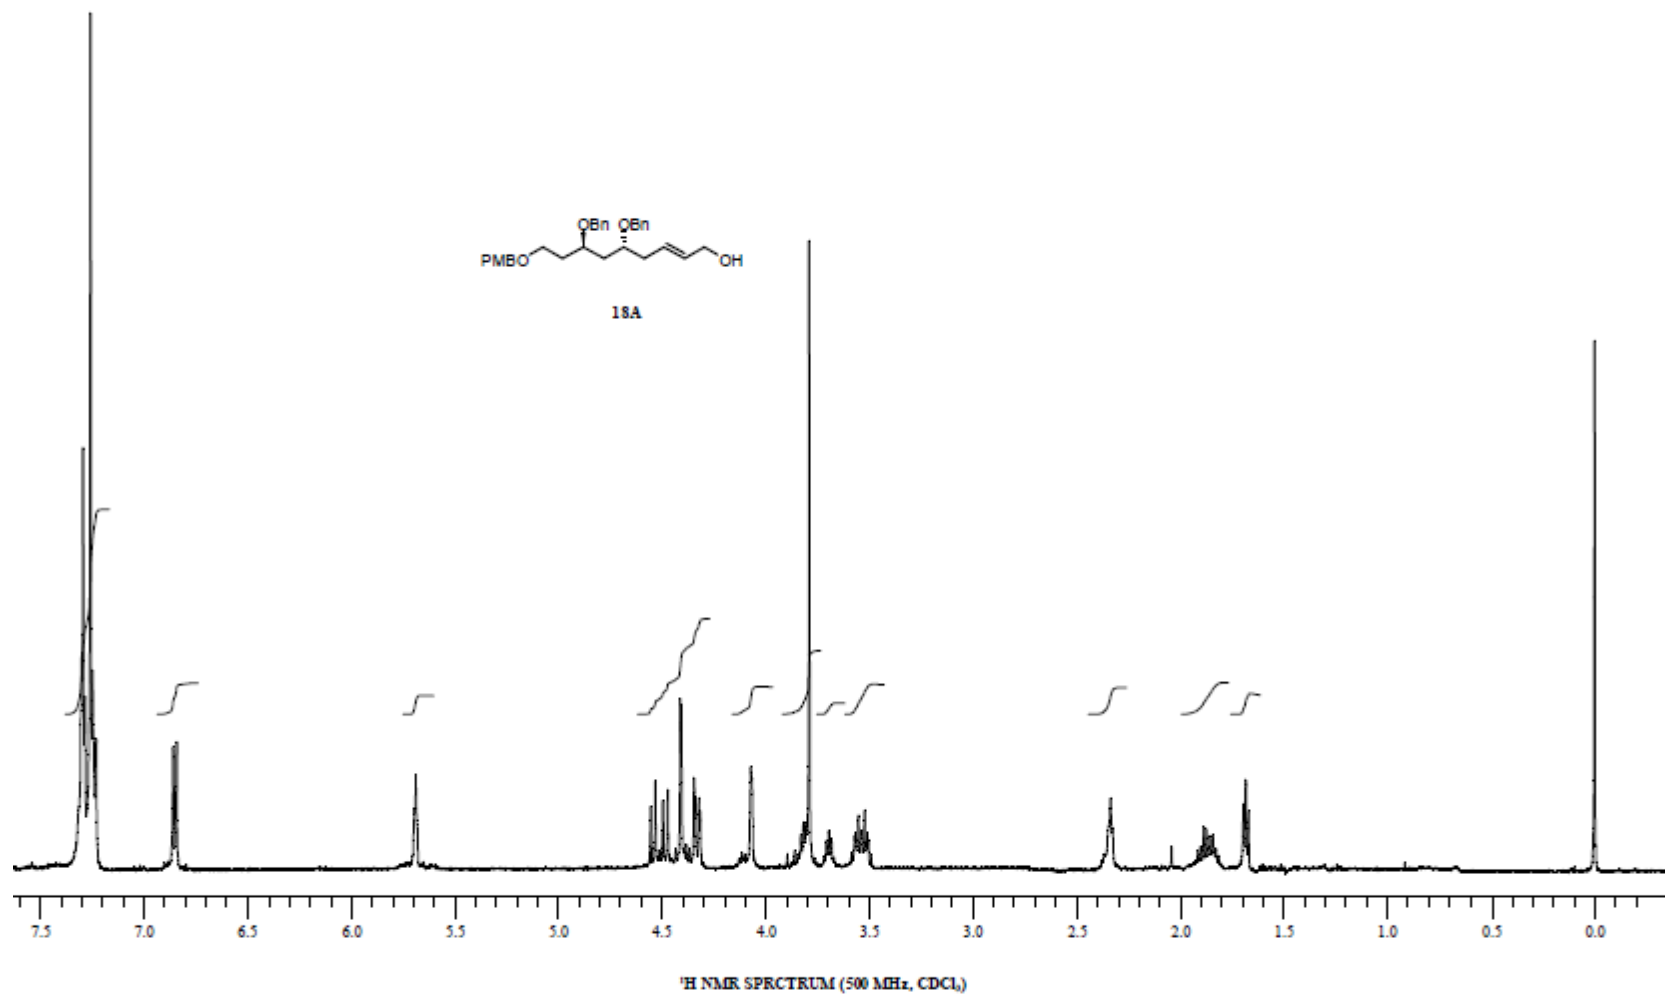

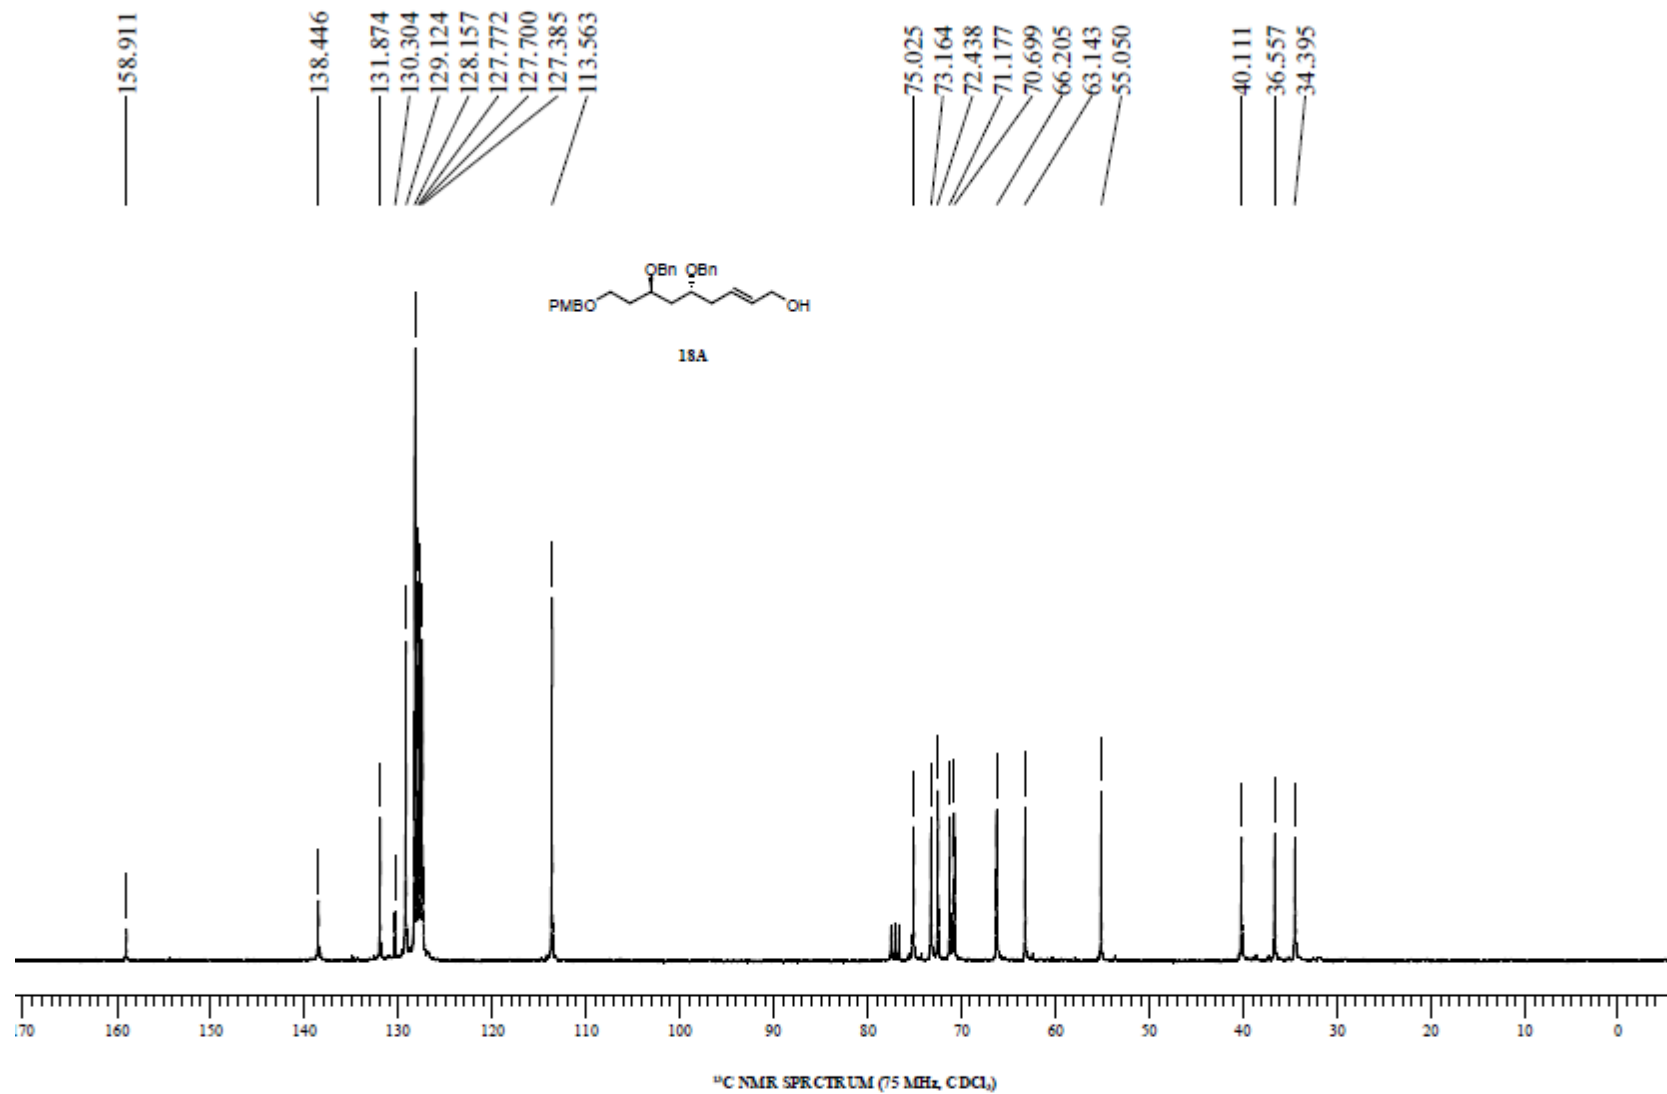

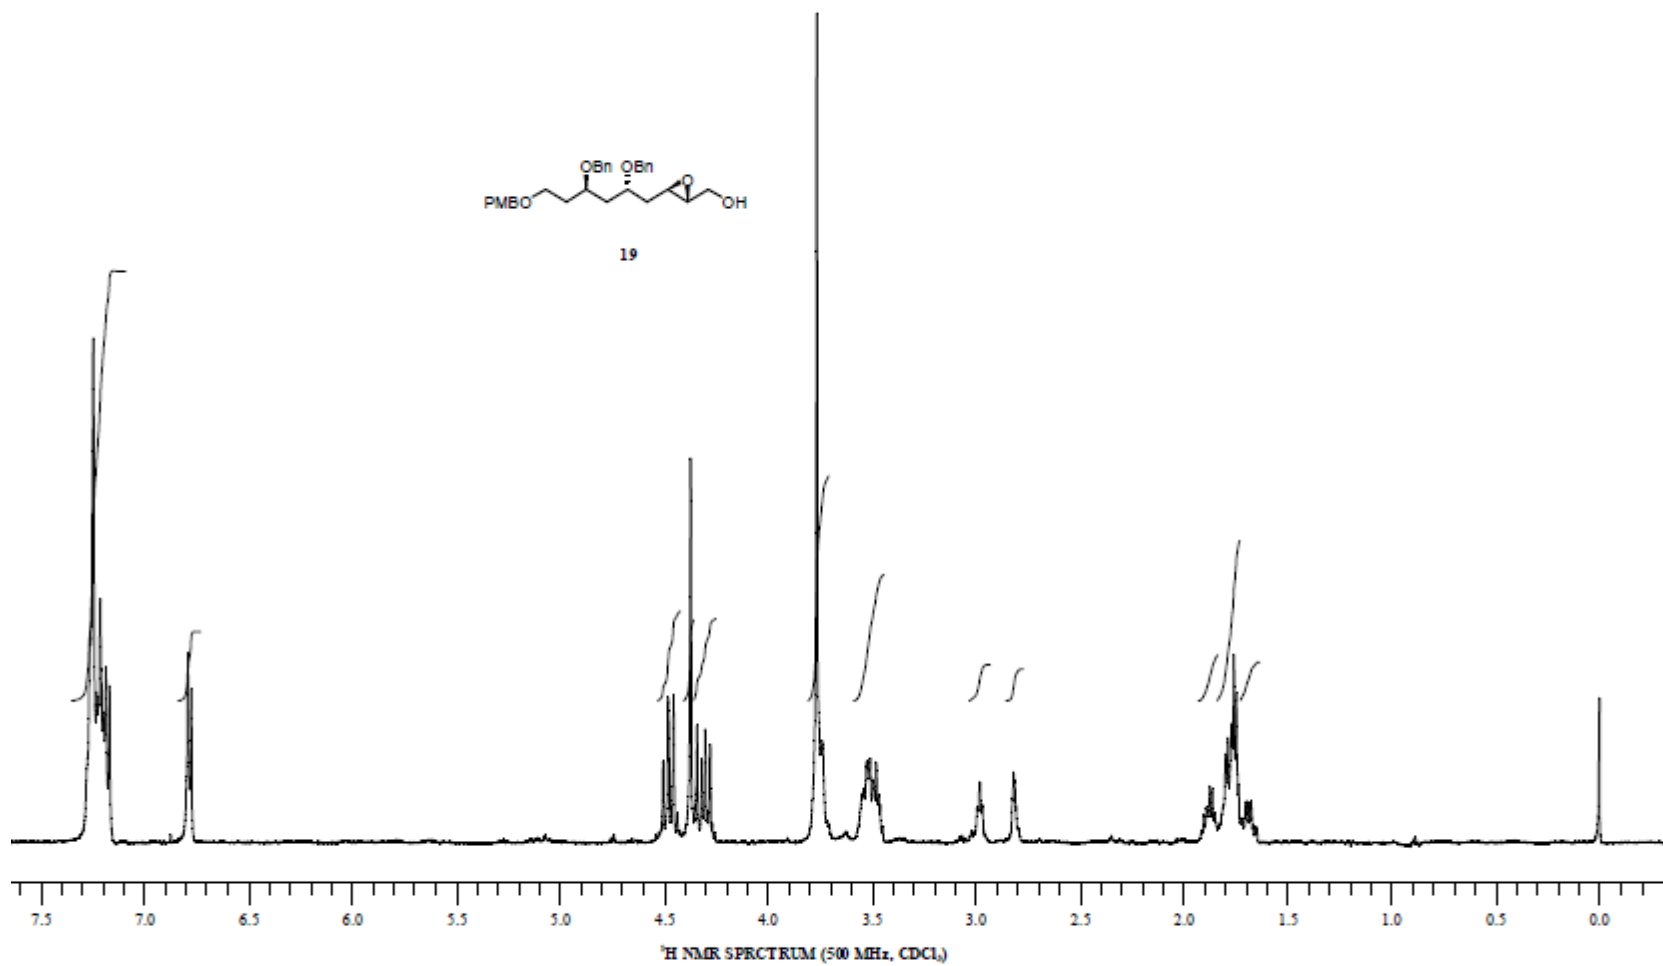



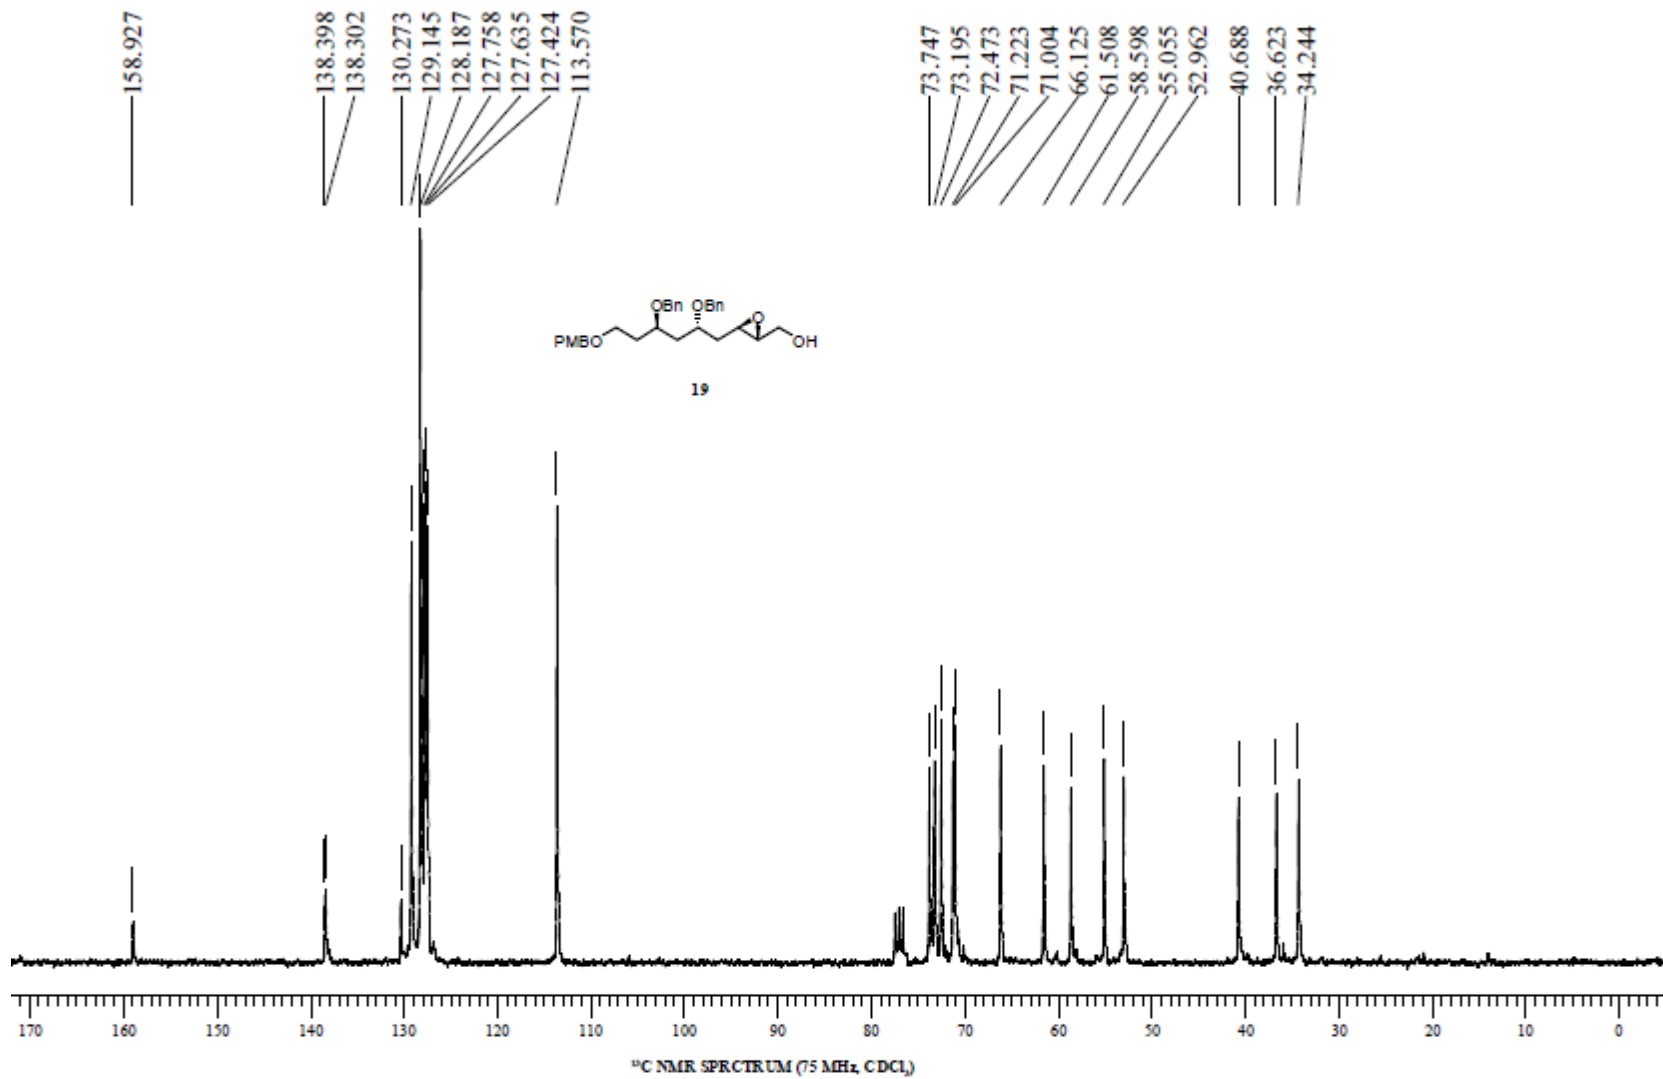

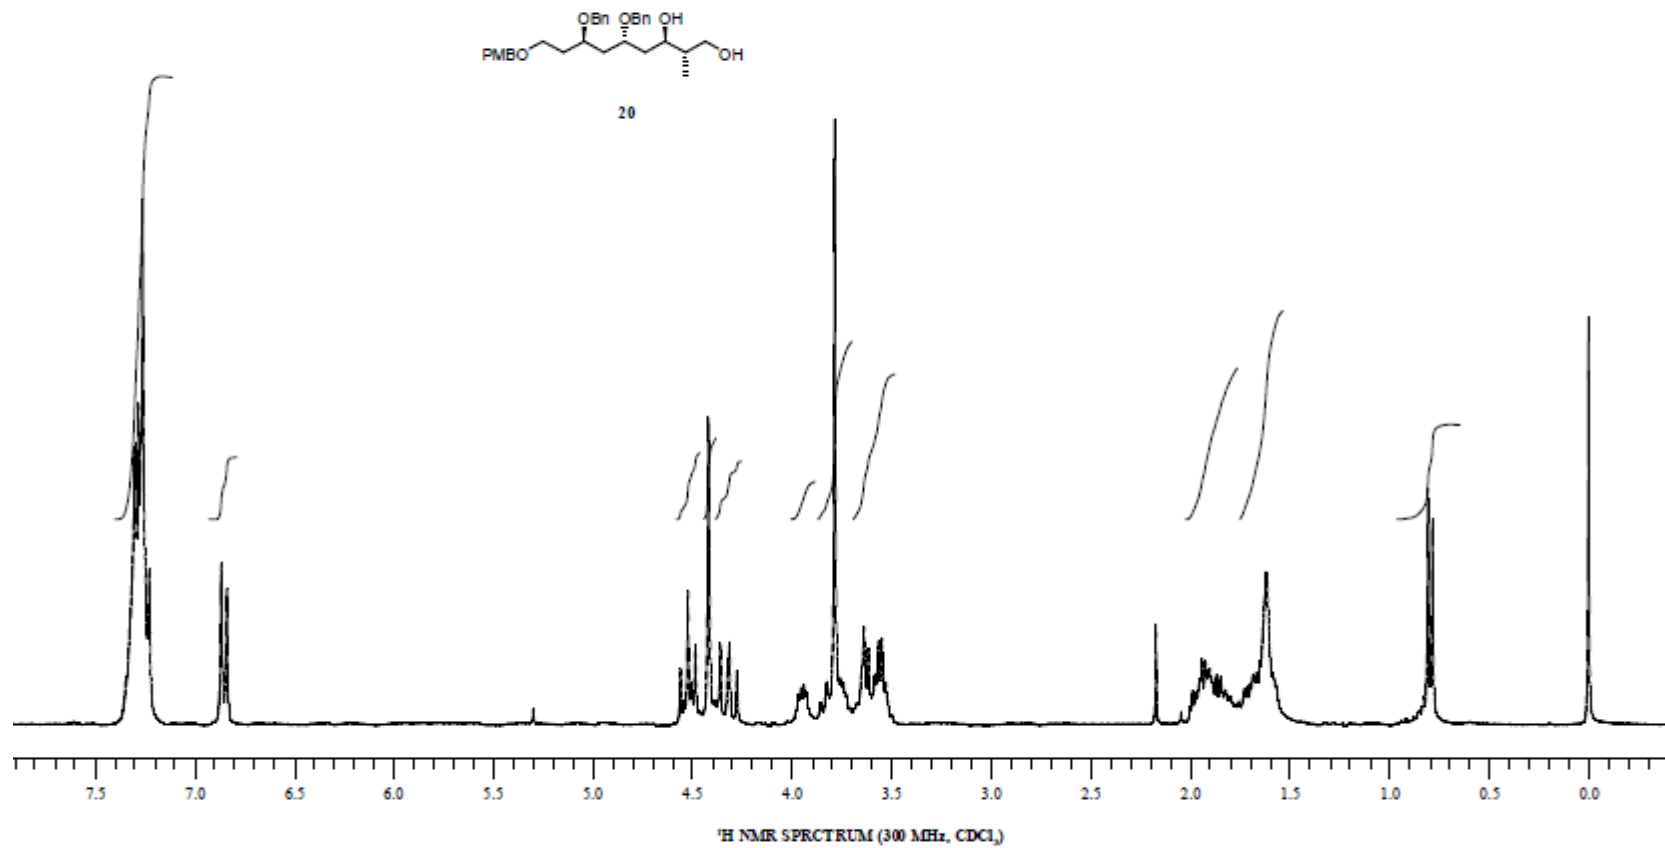

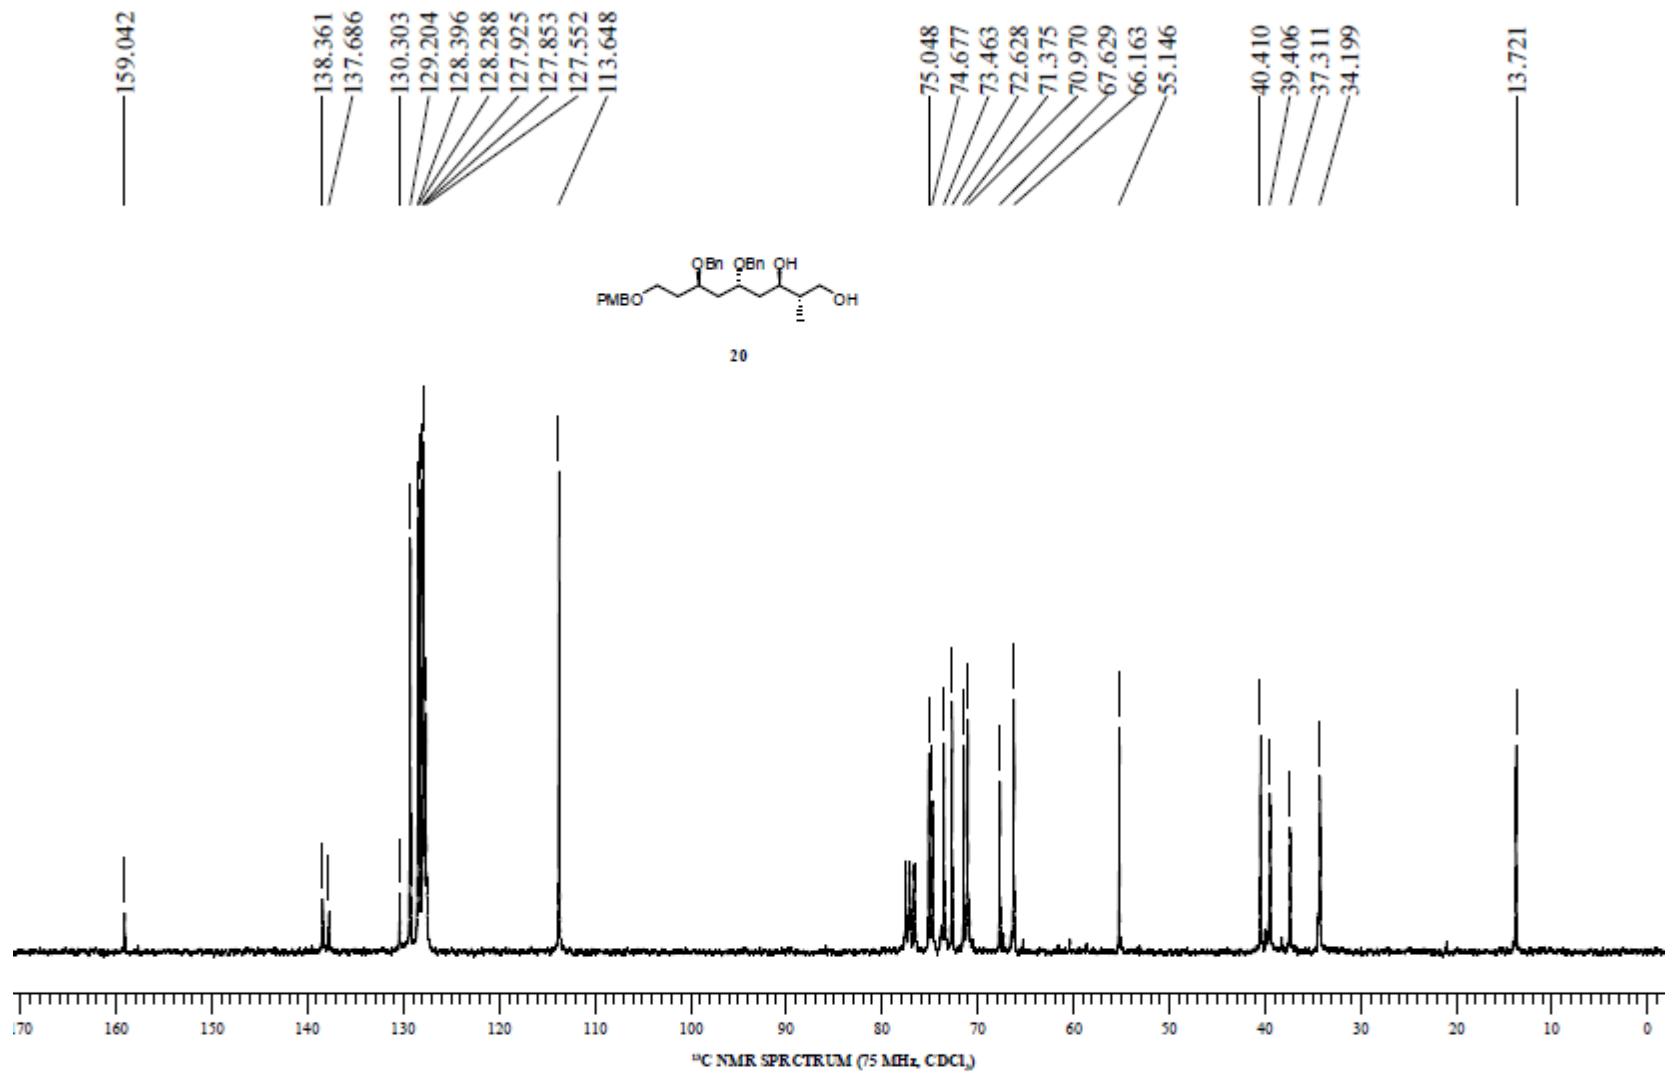

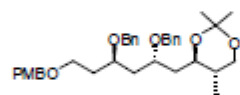

20A

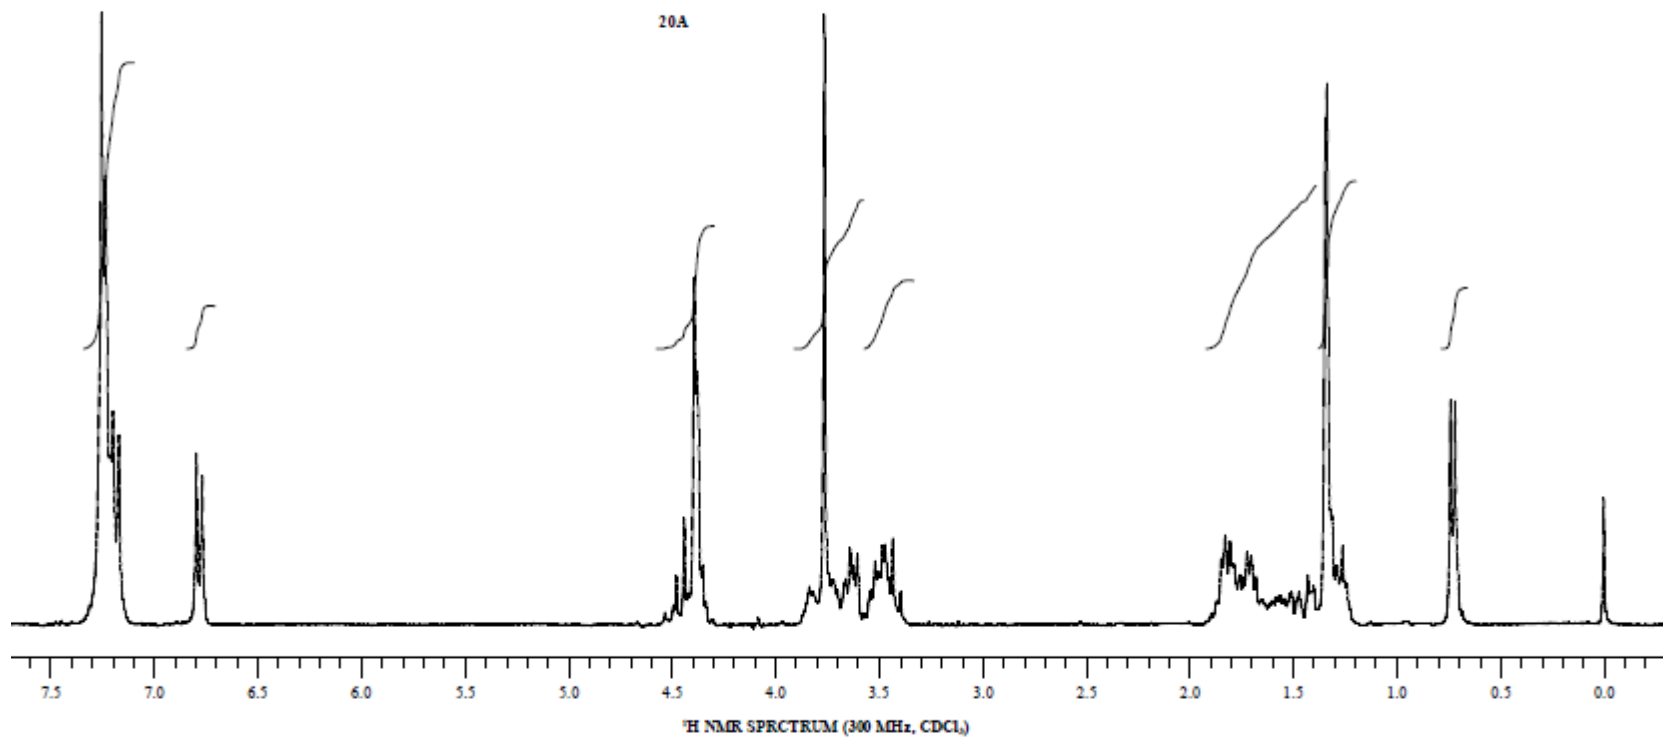



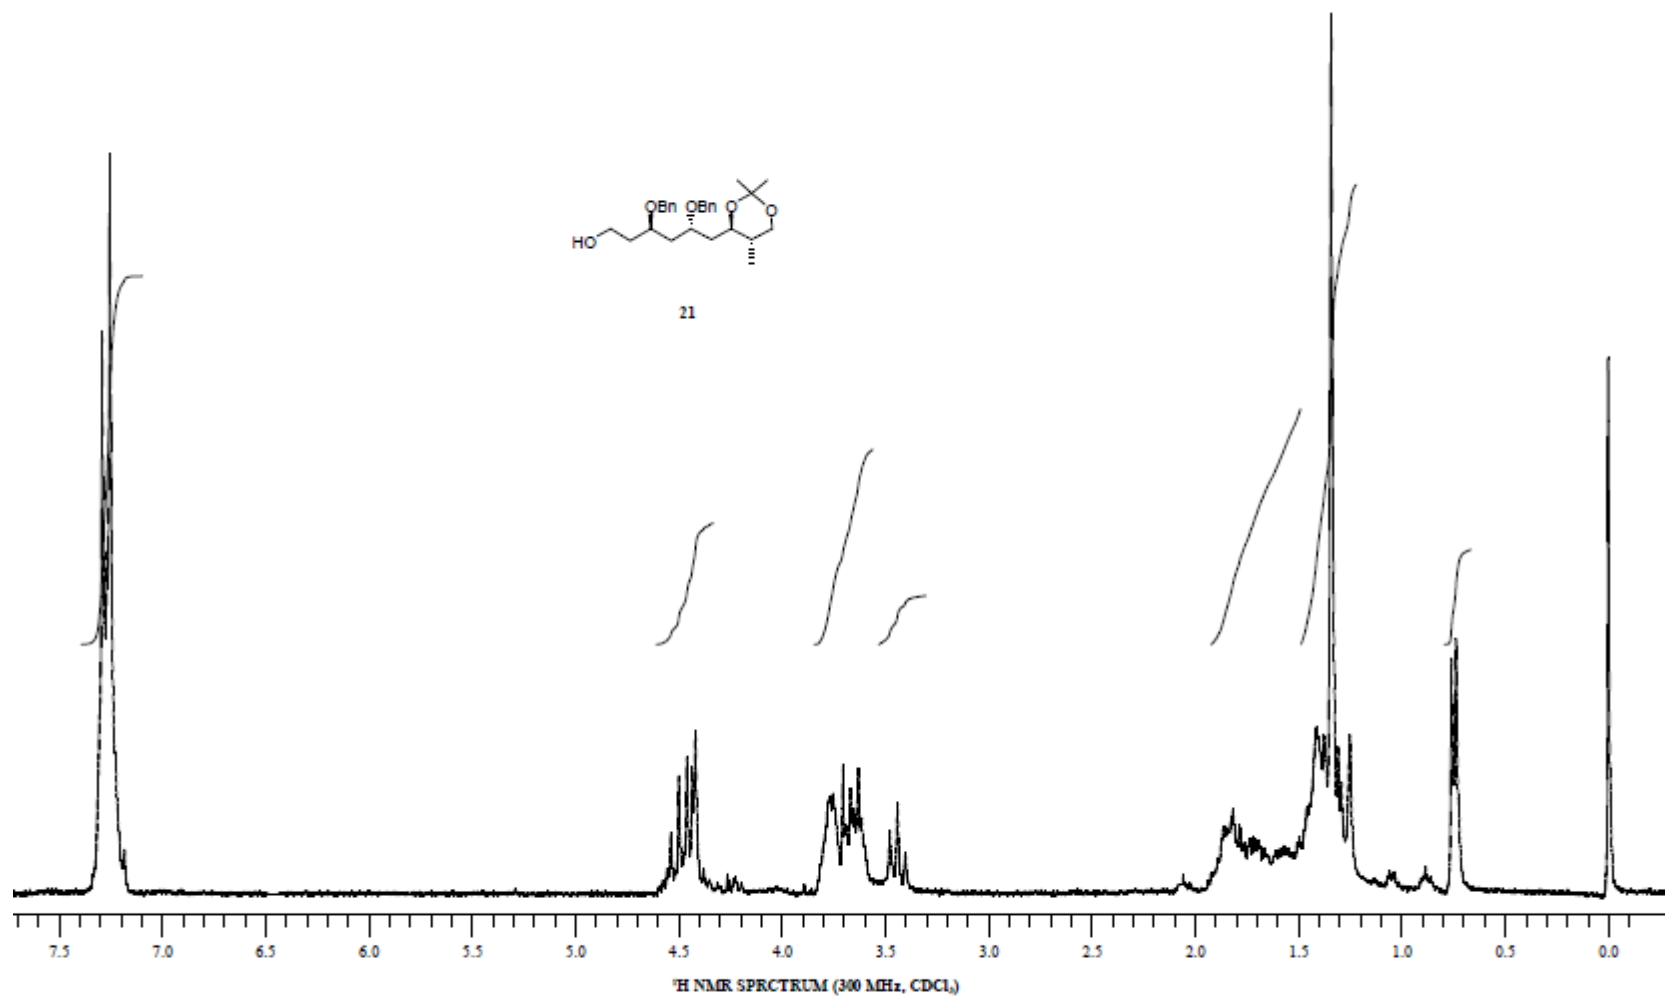

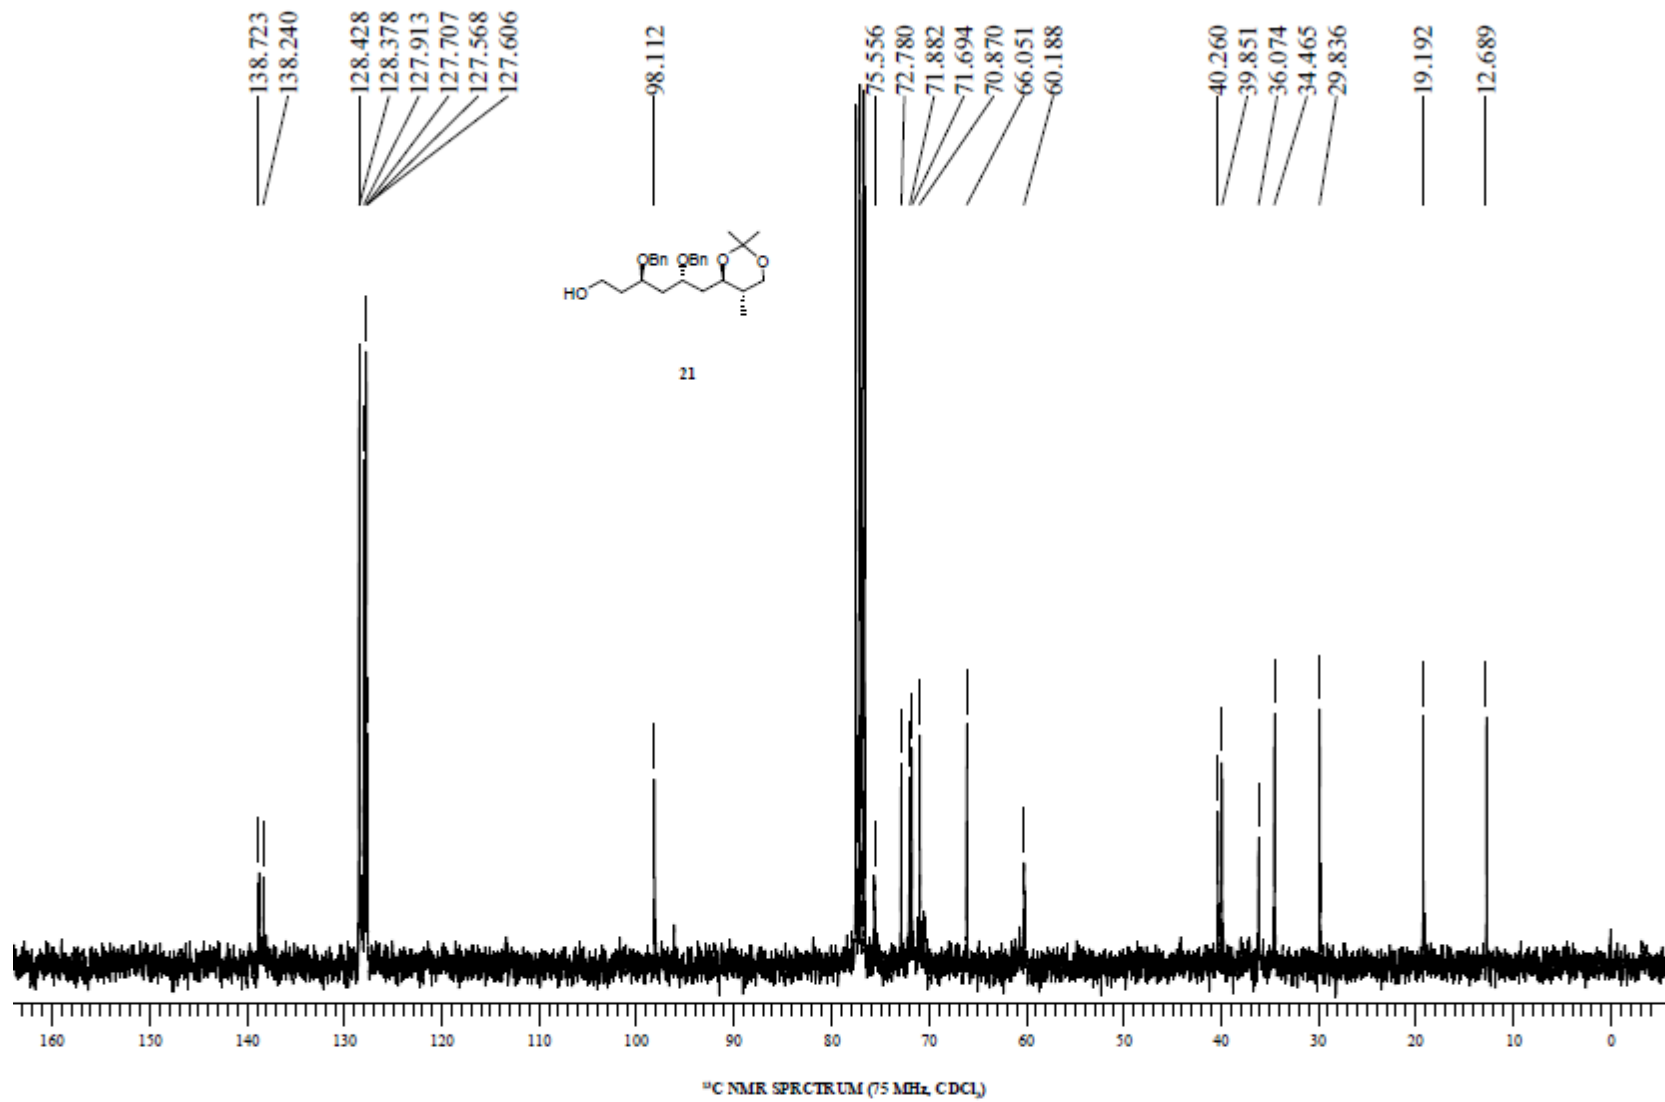

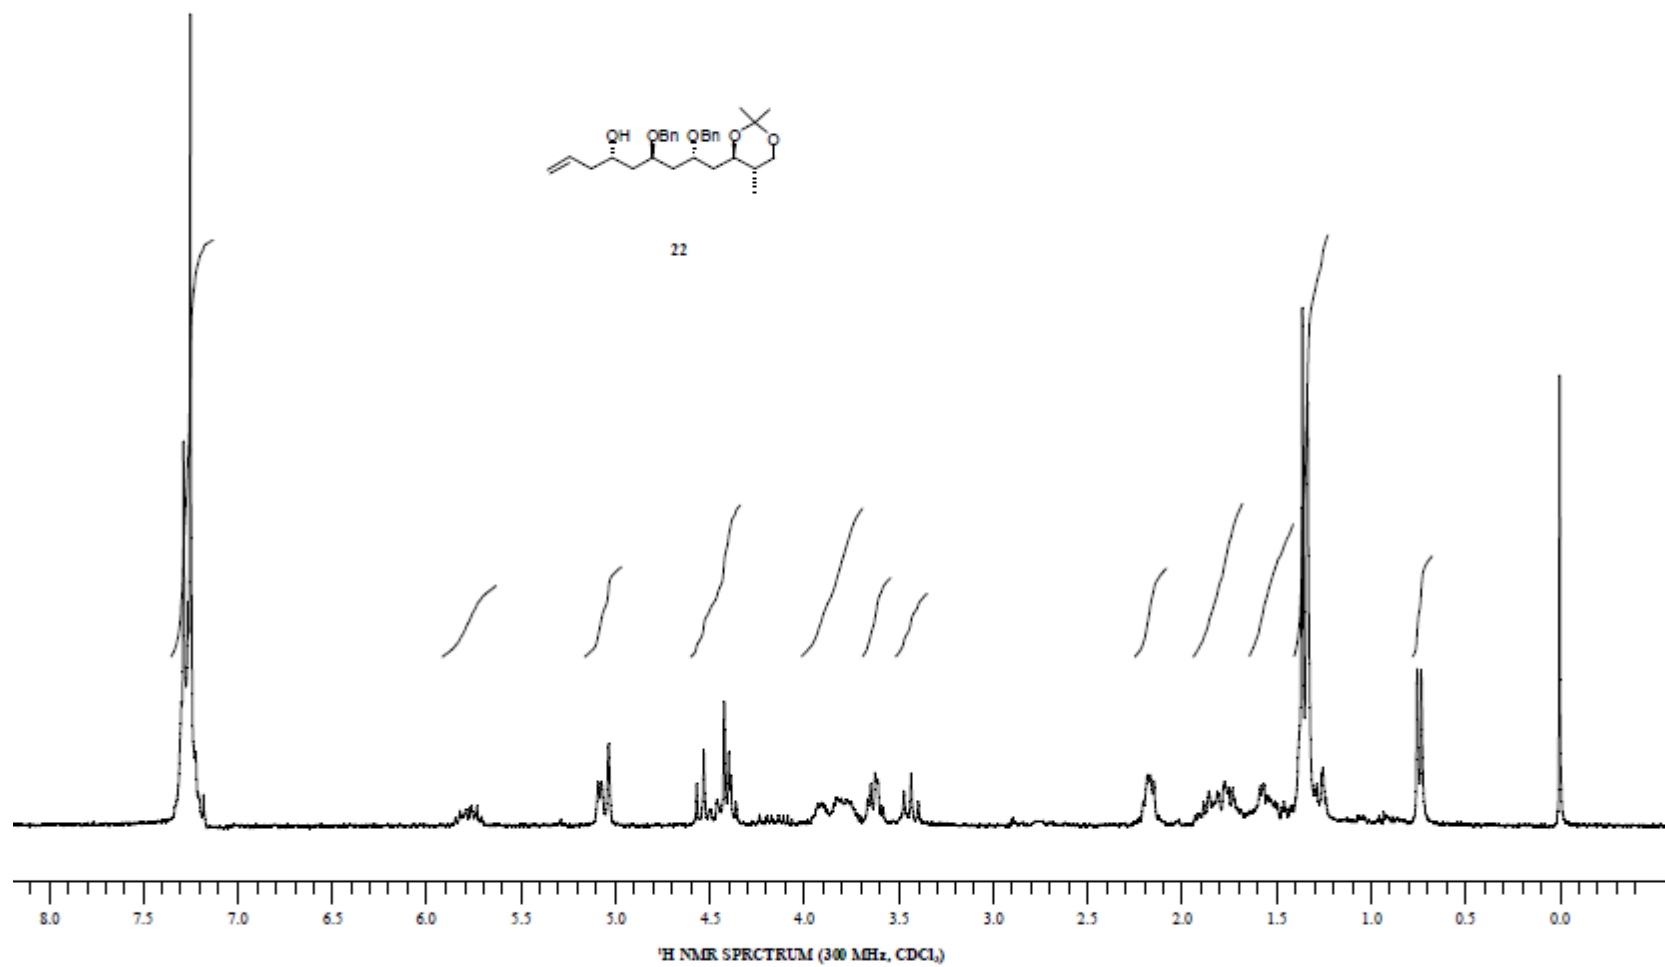



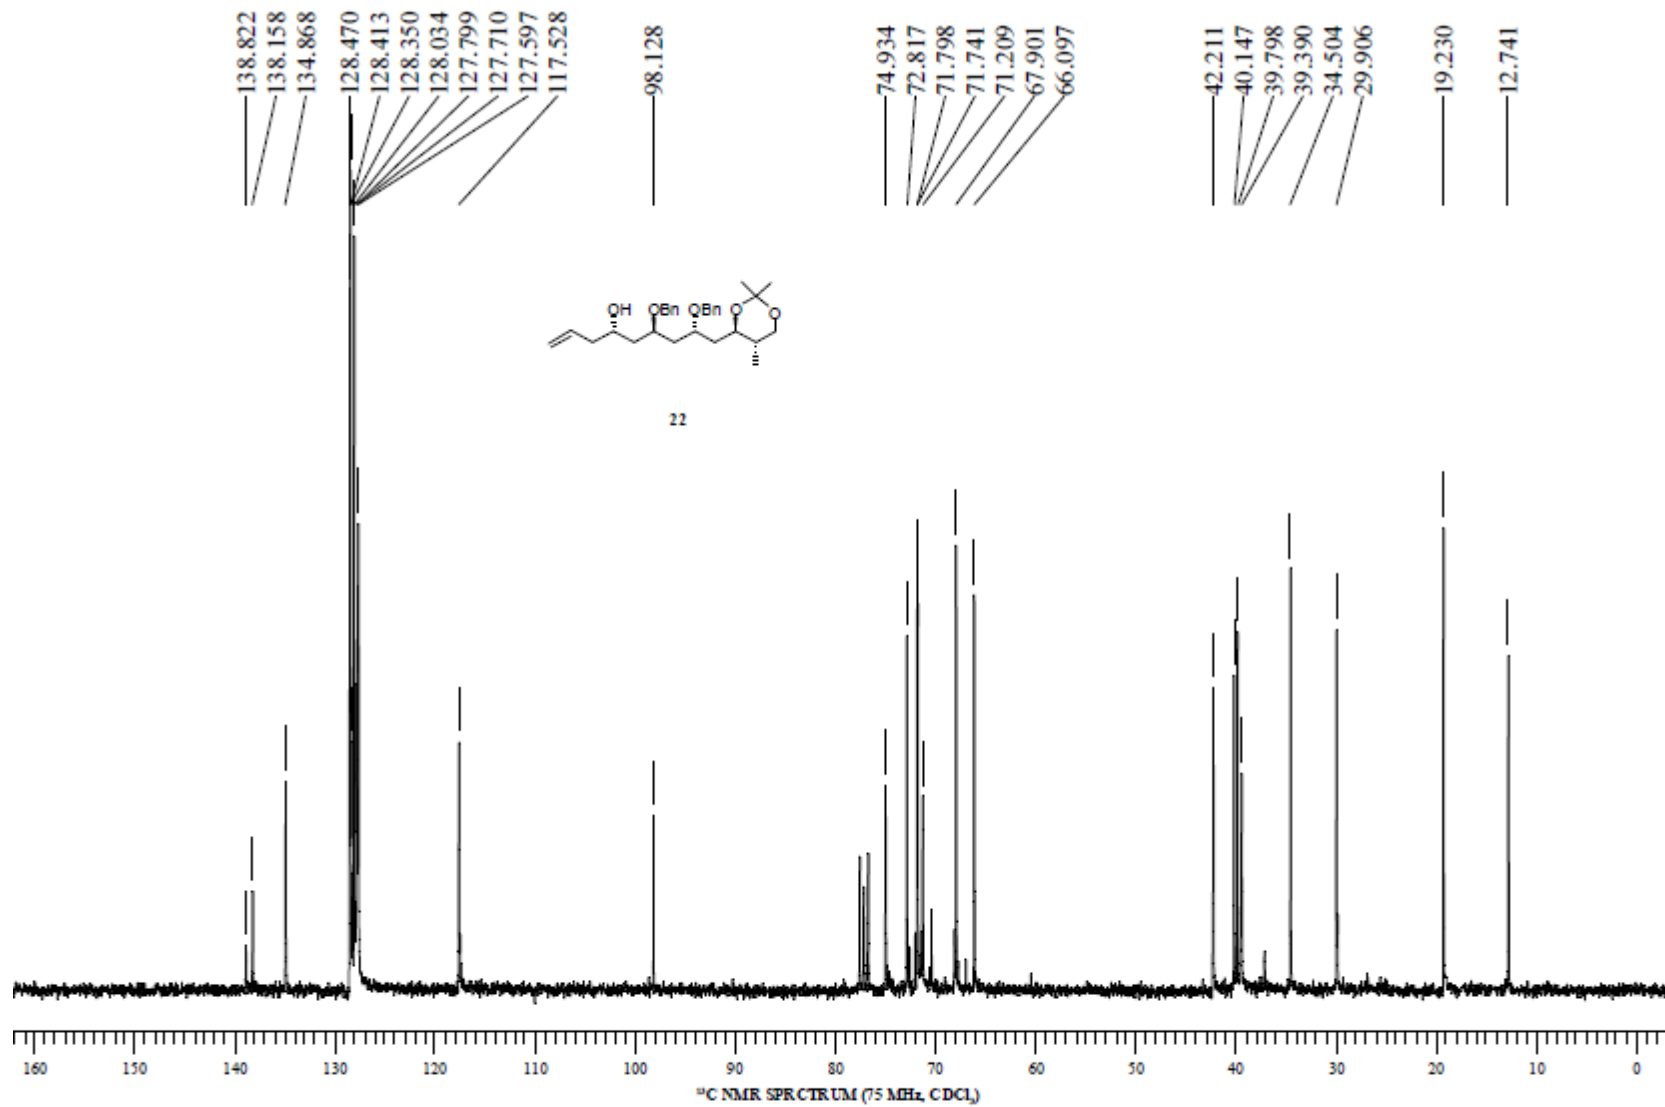

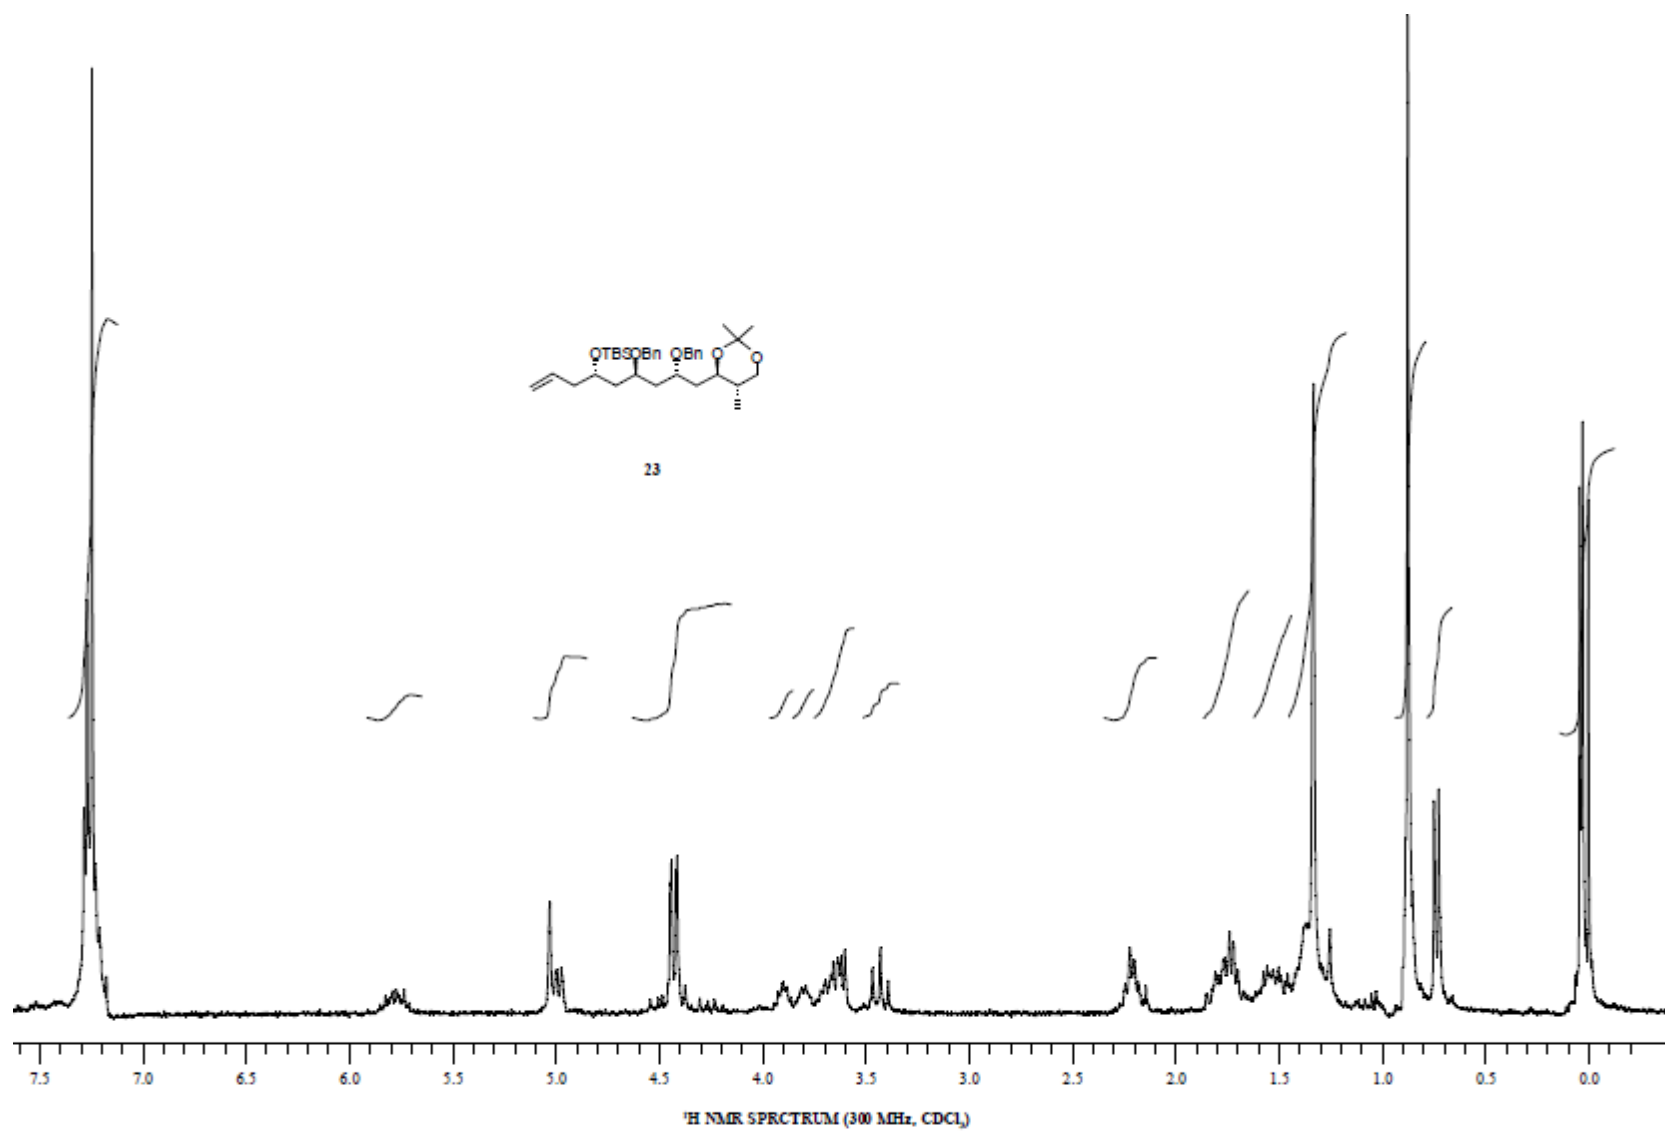

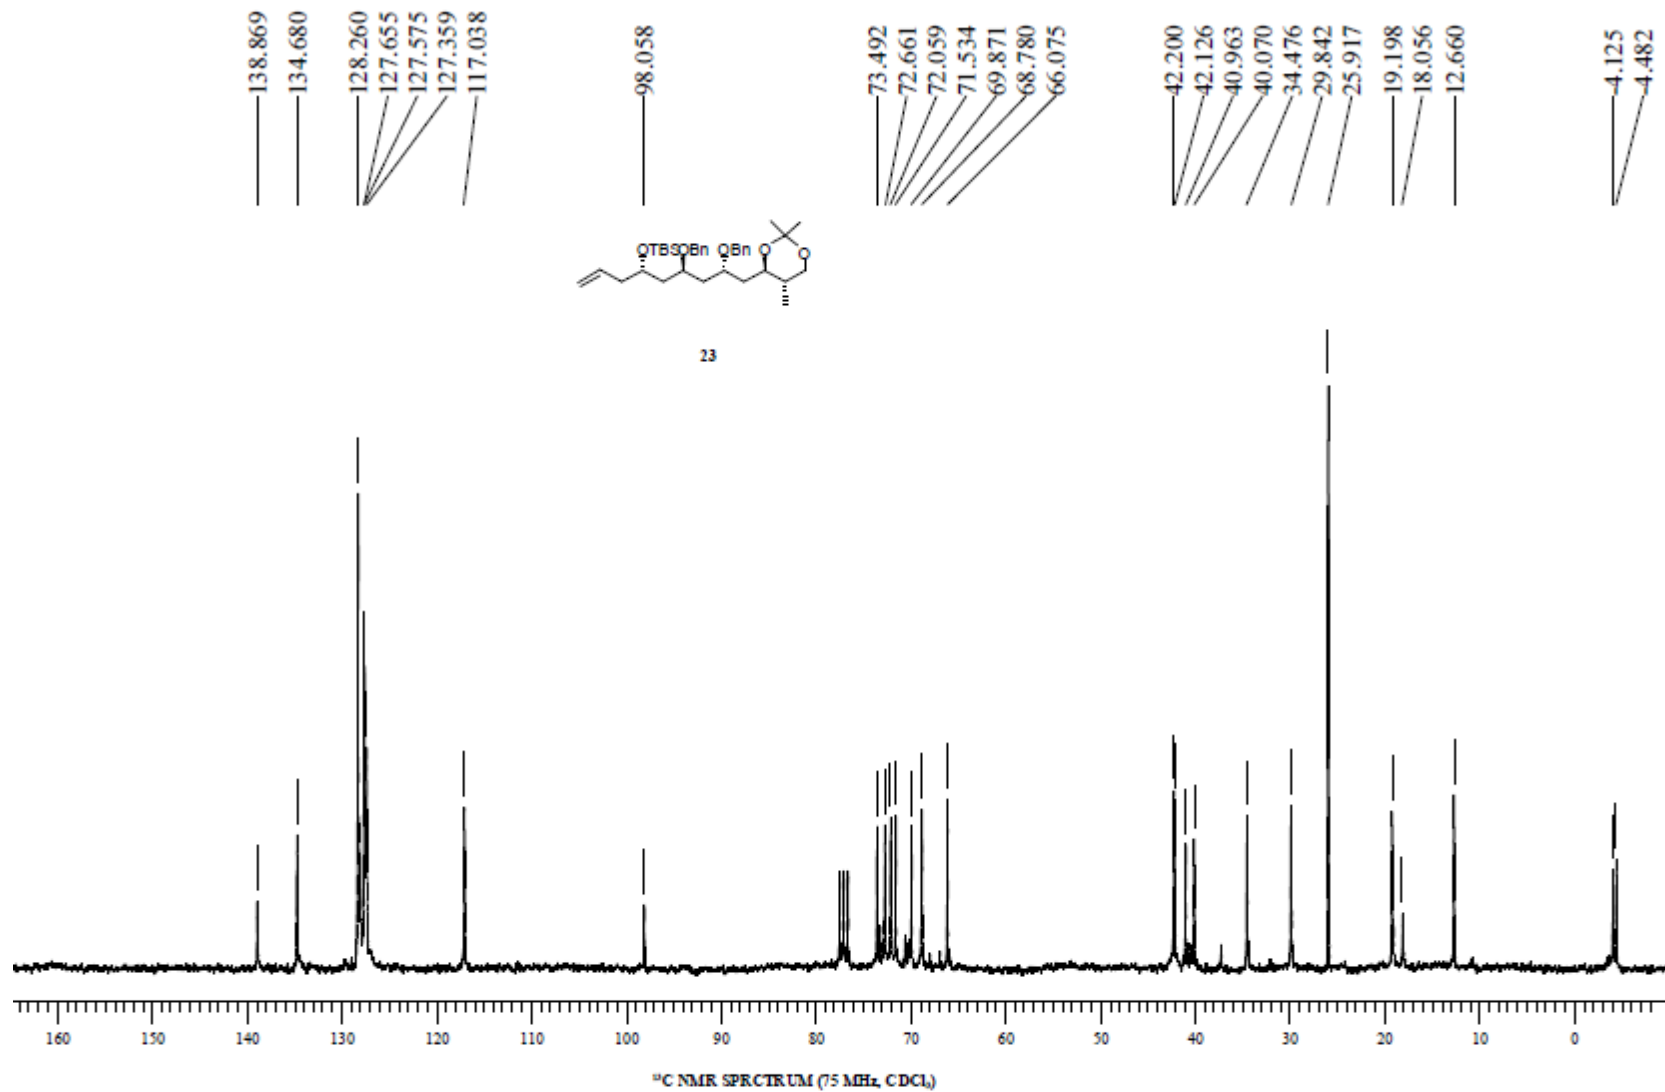



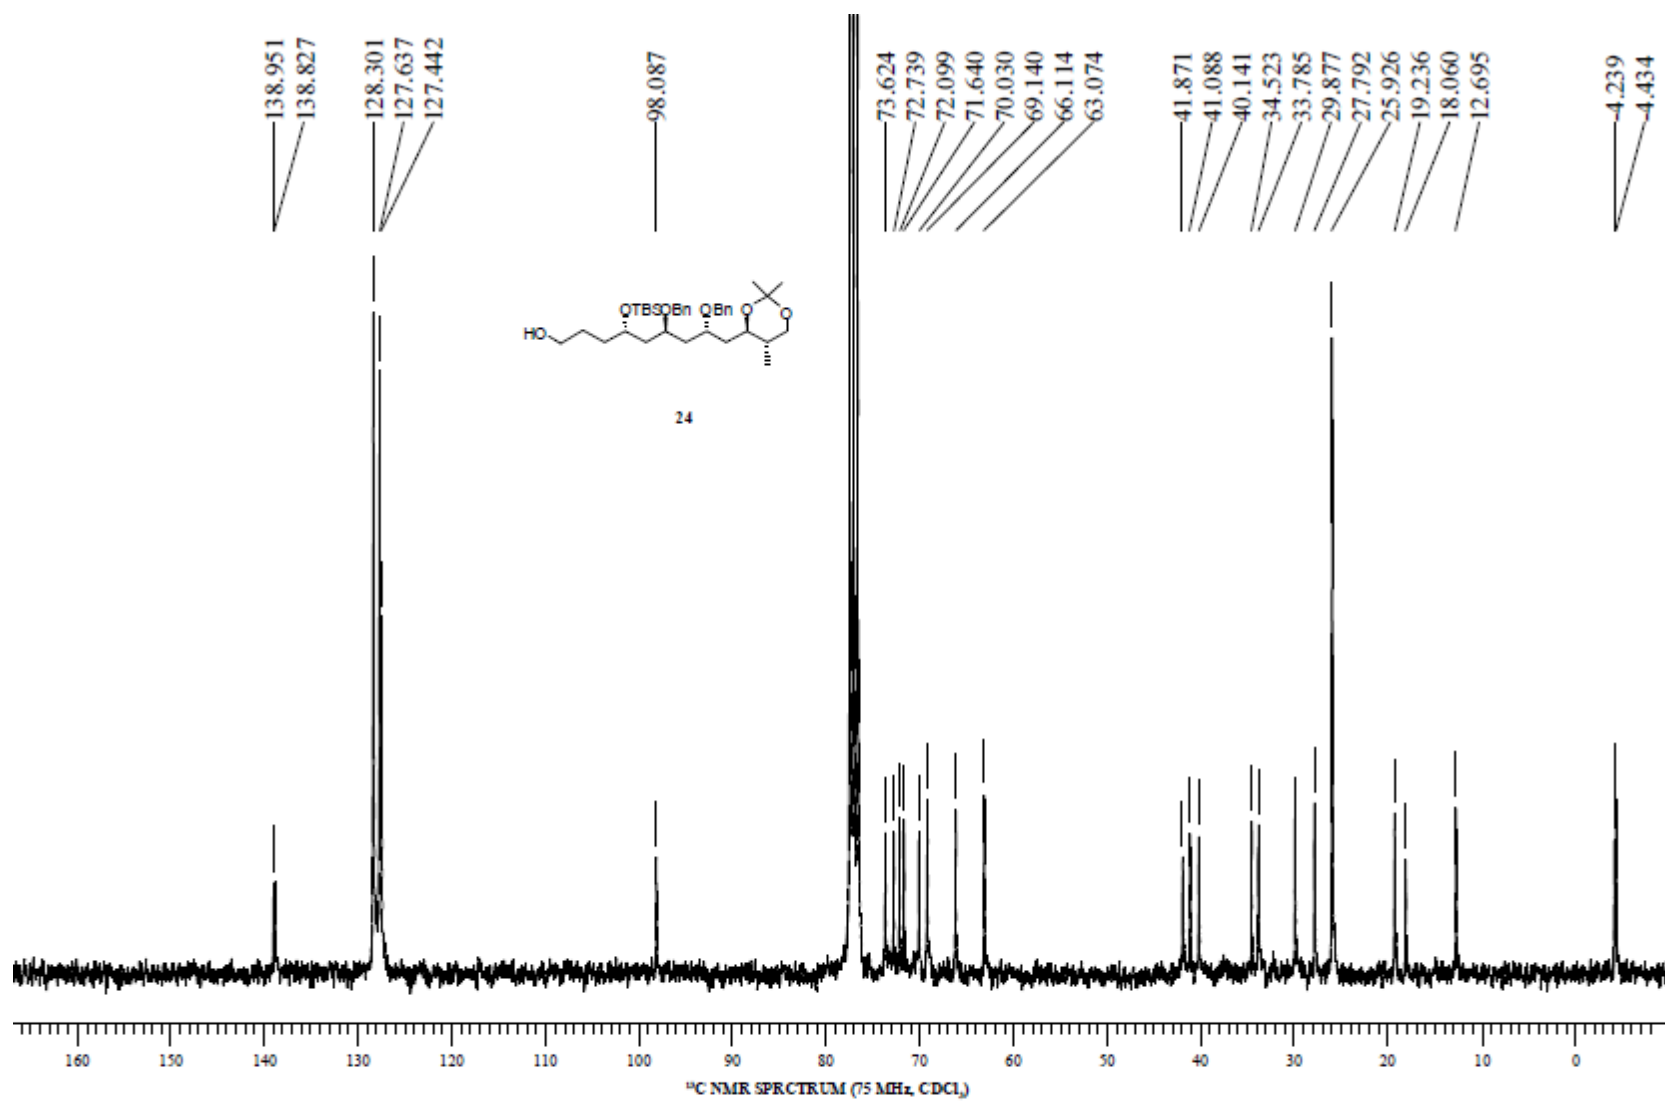

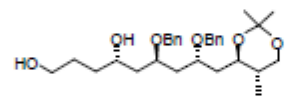

25

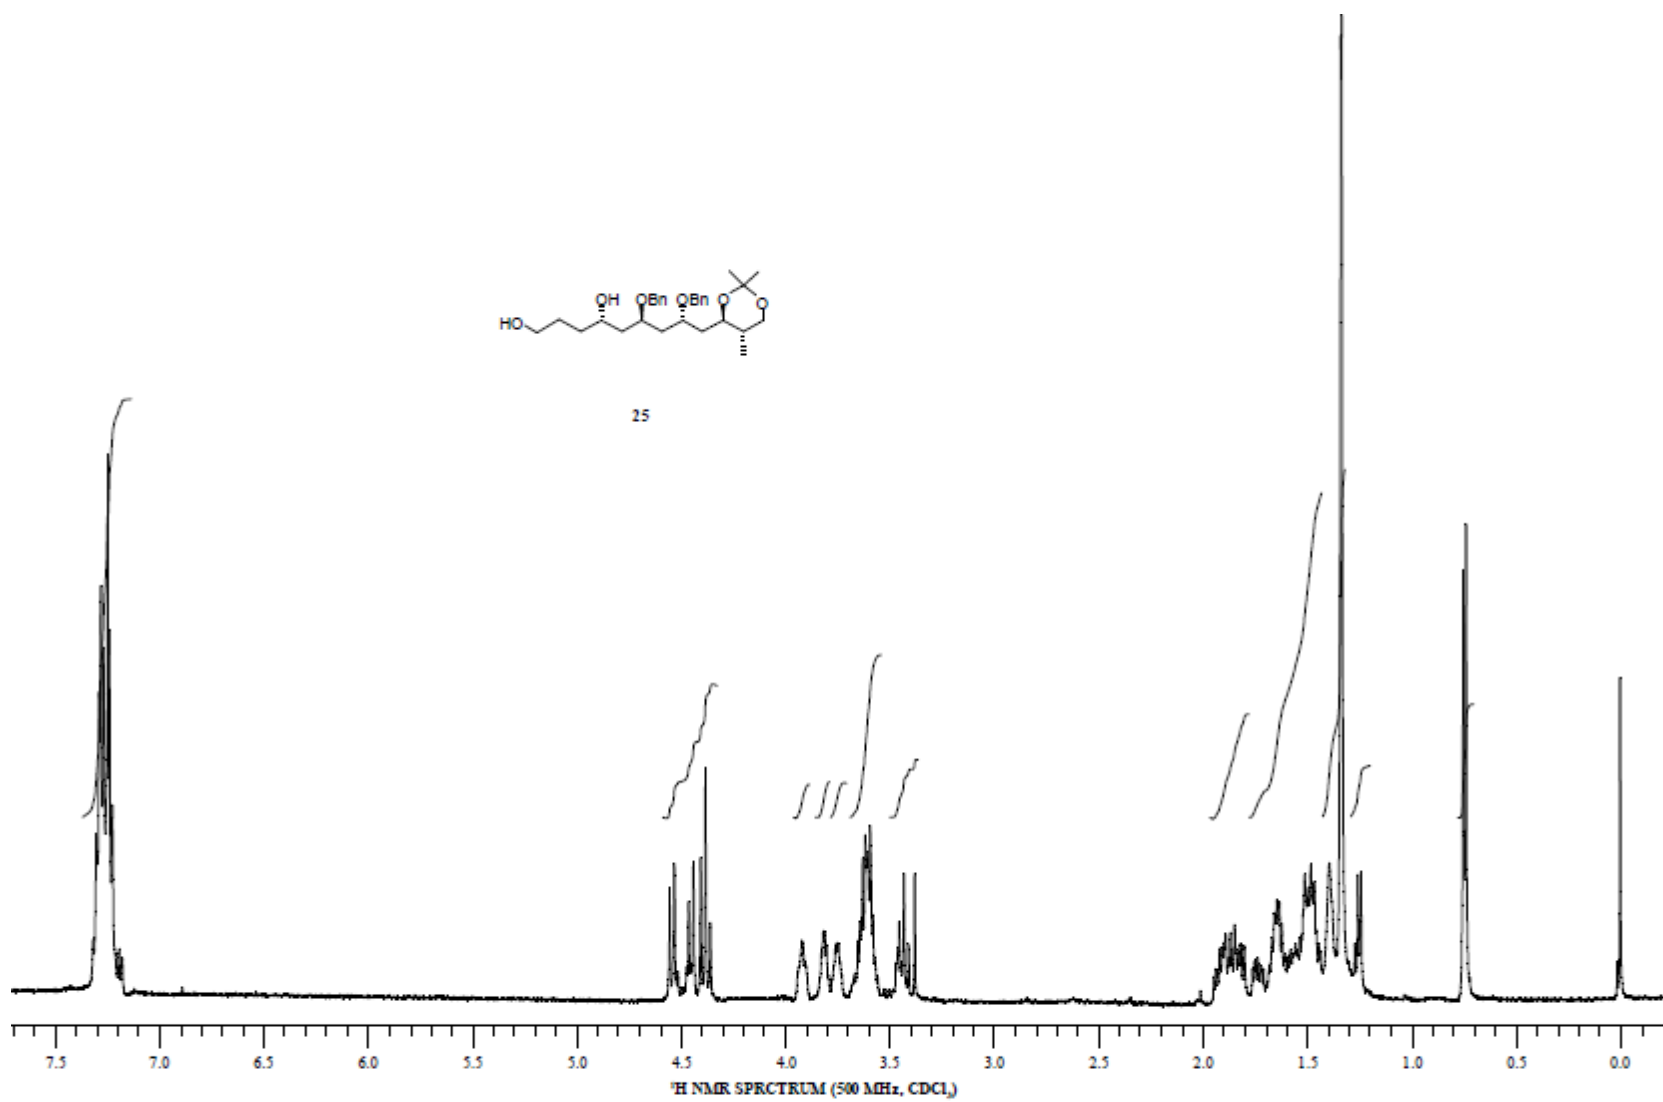

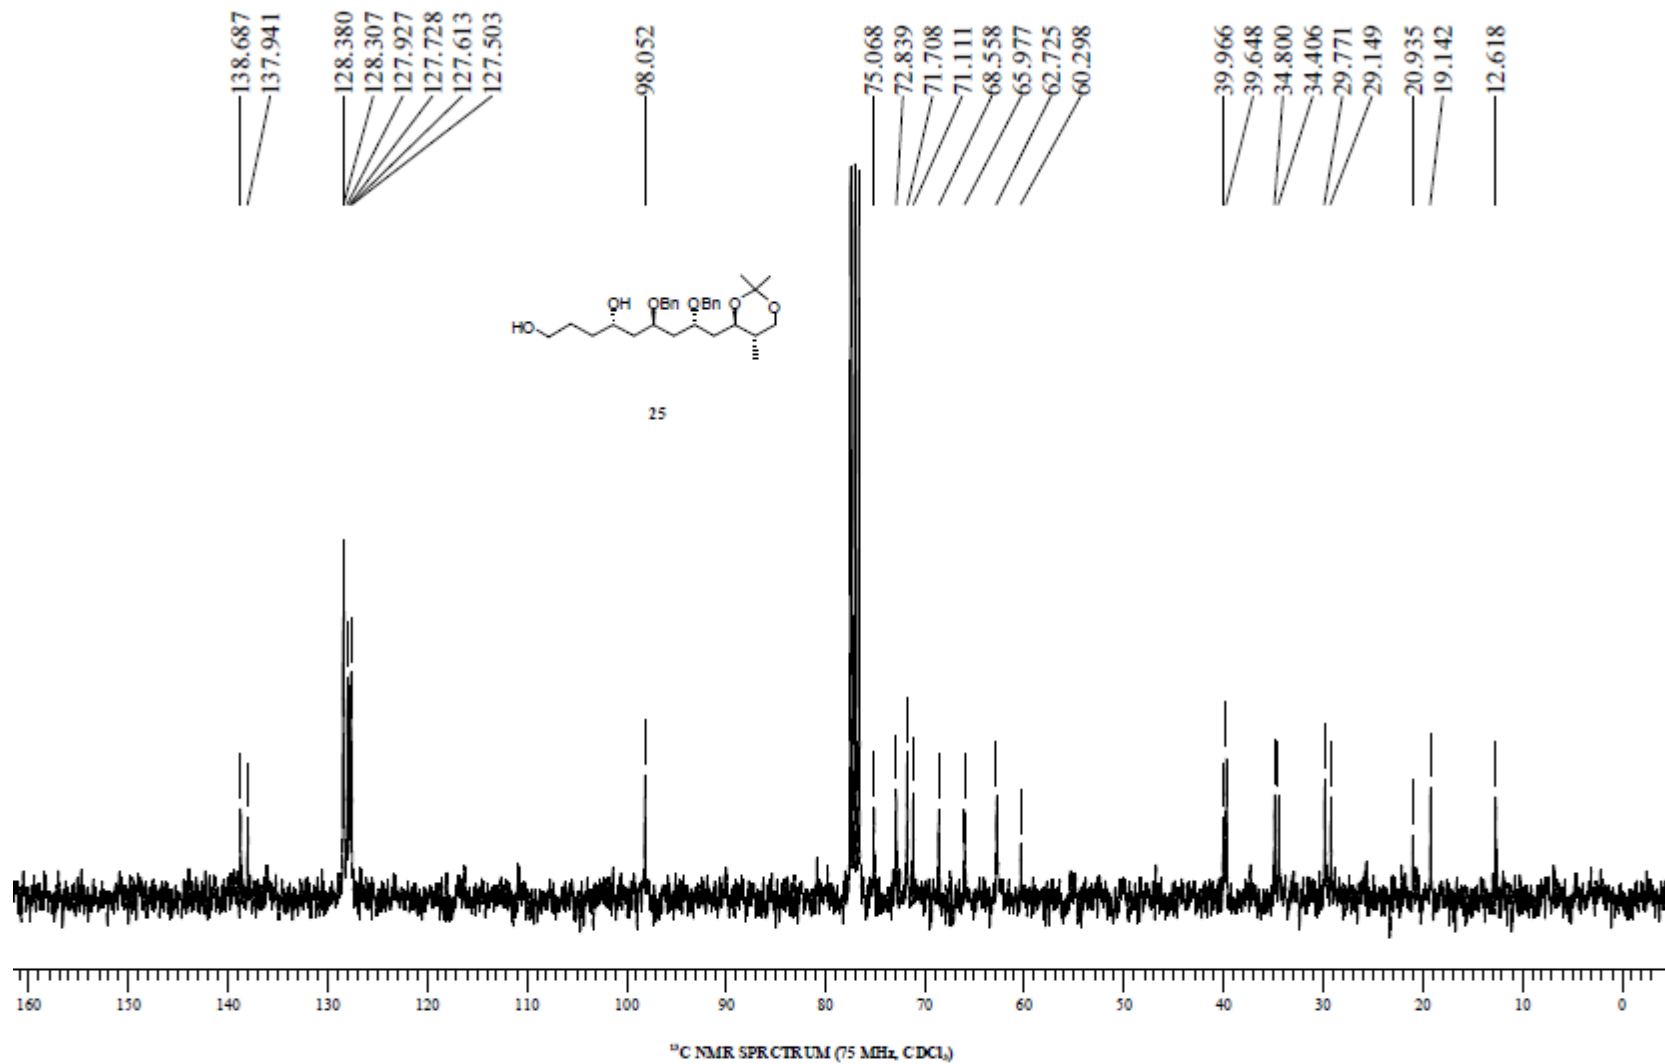

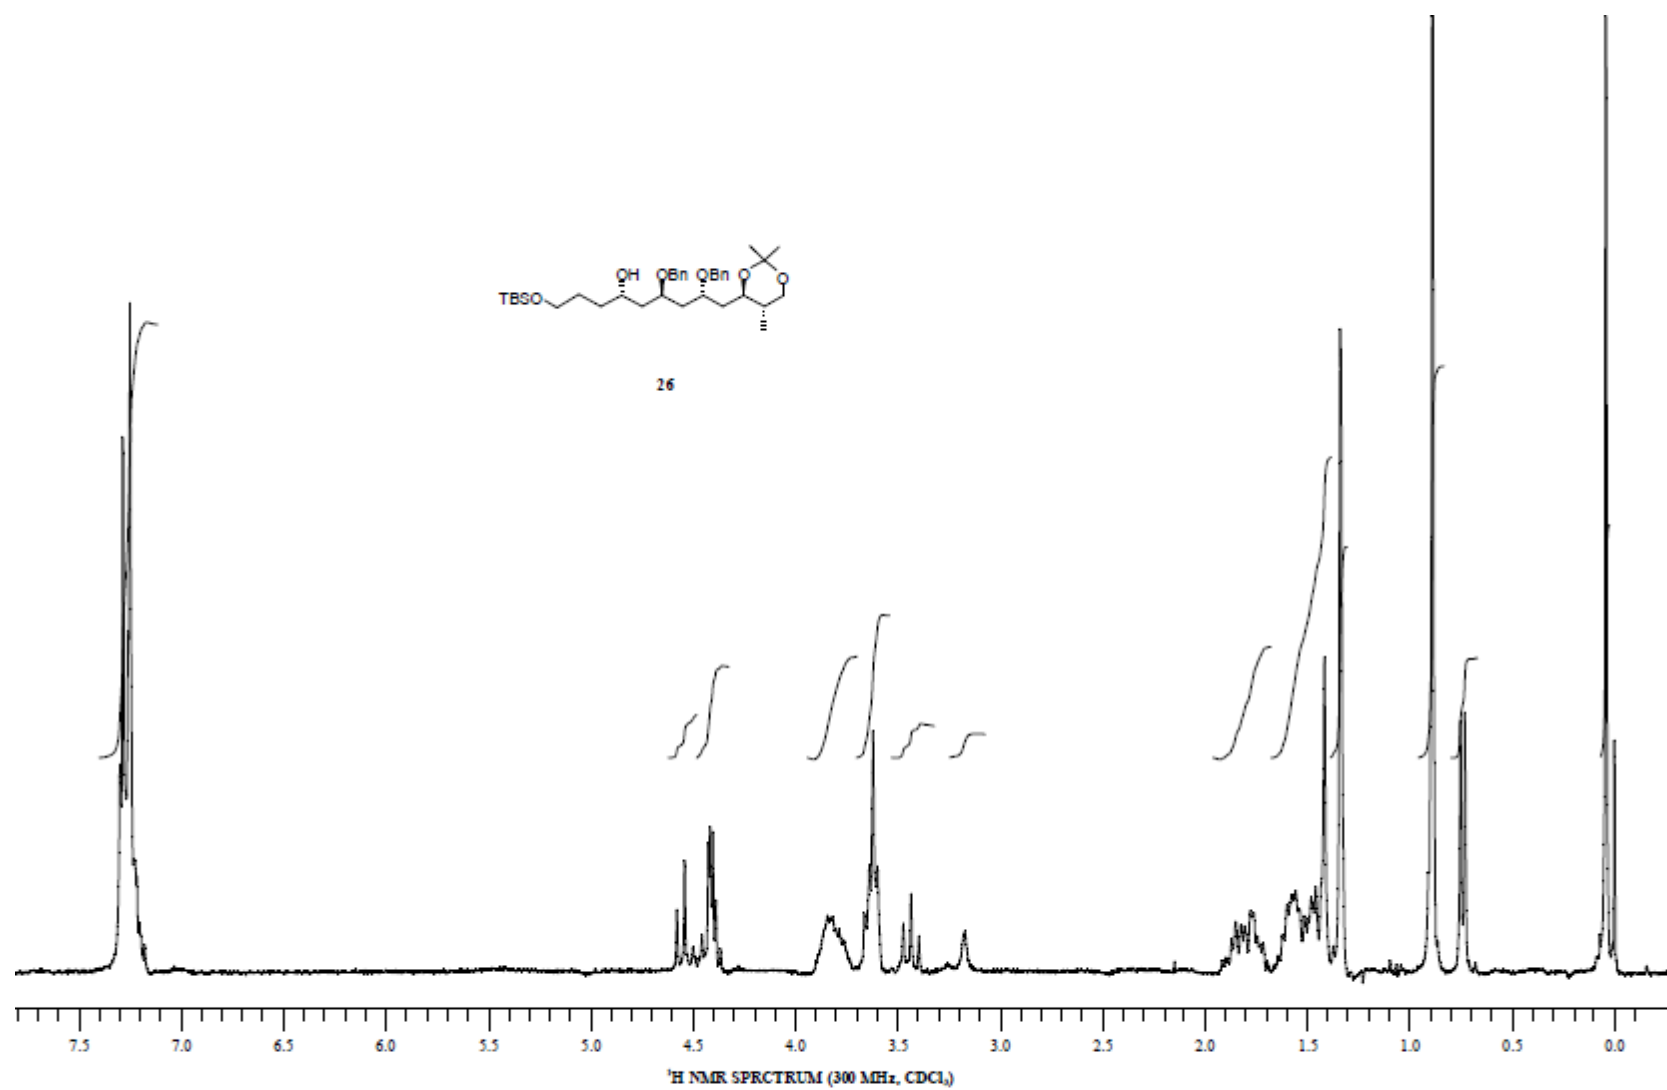



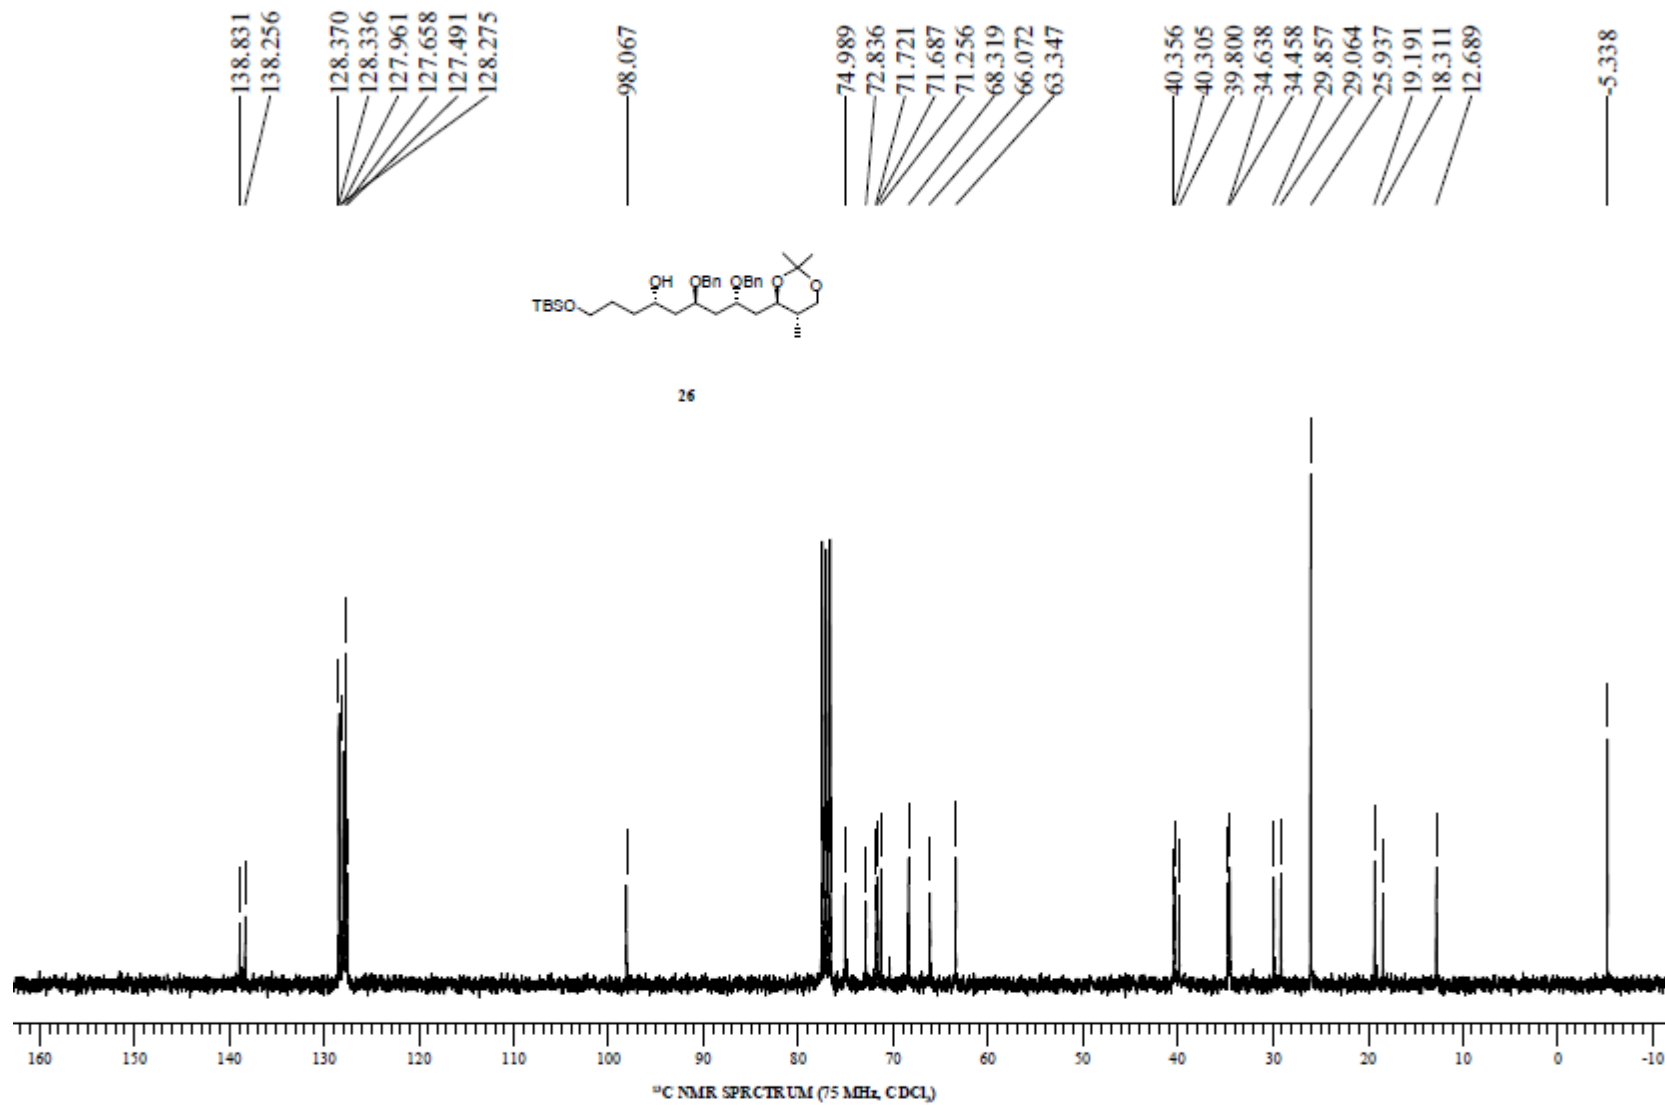

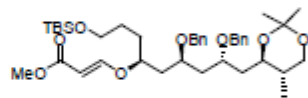

27

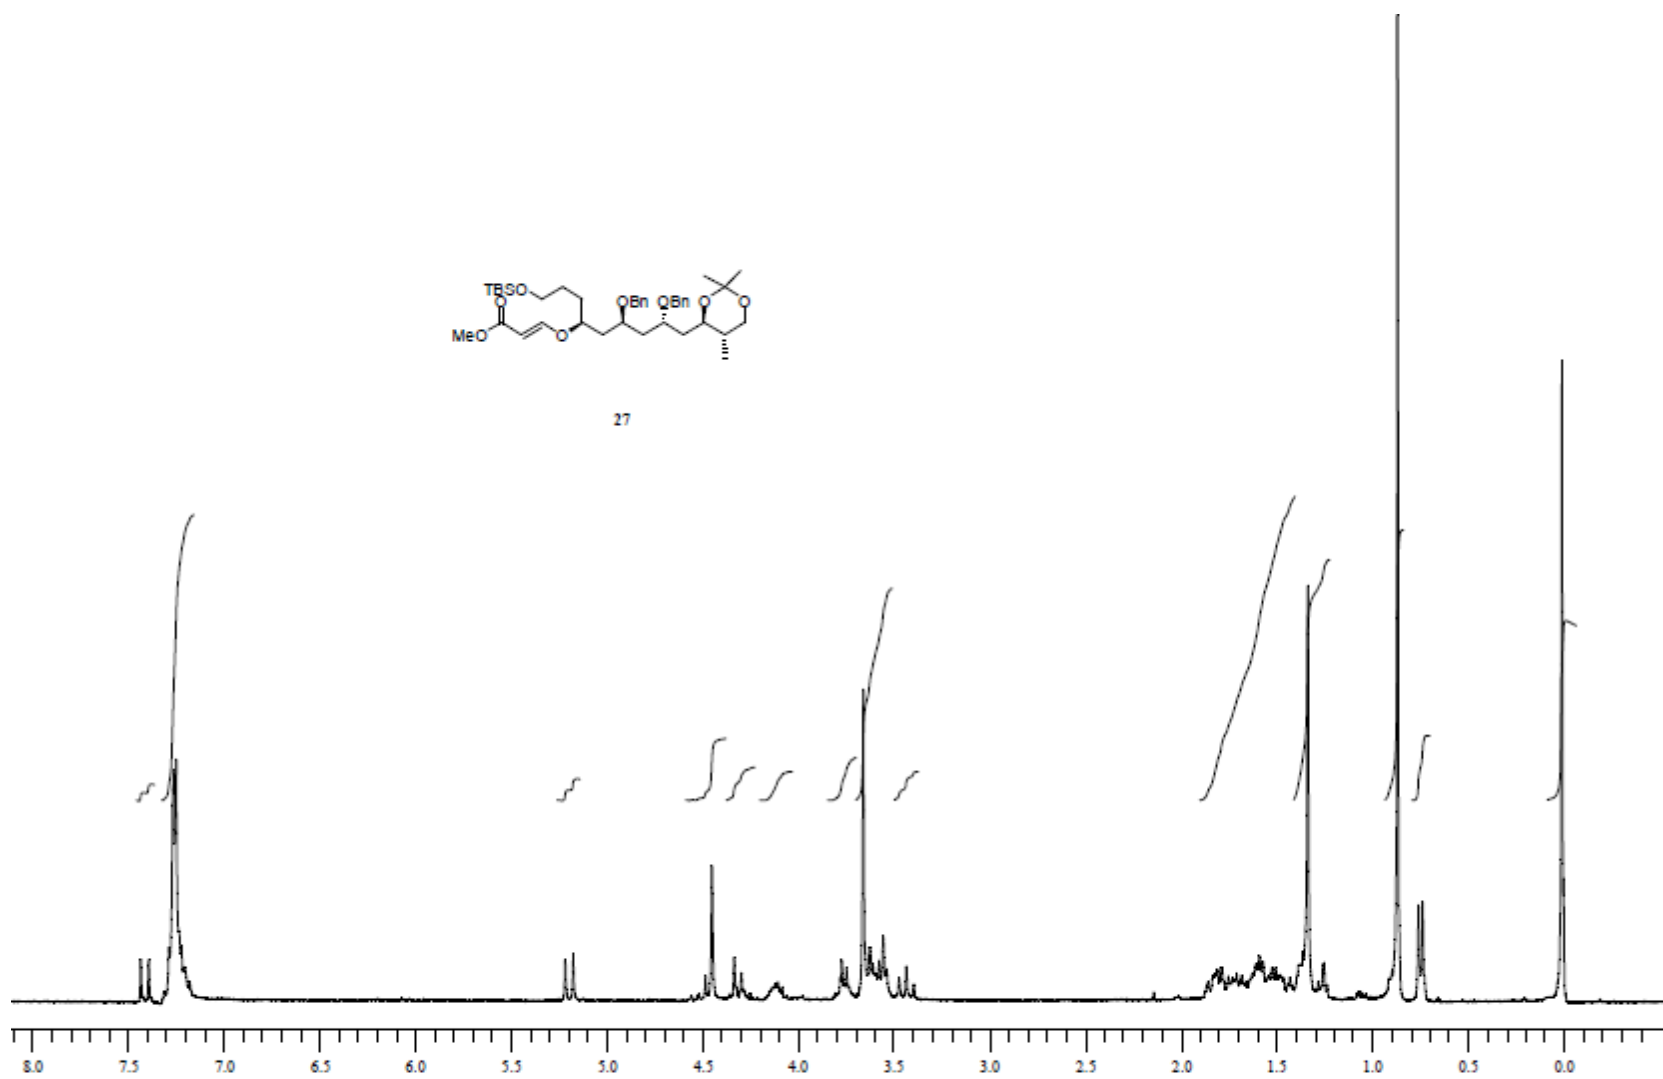

<sup>1</sup>H NMR SPECTRUM (300 MHz, CDCl<sub>3</sub>)

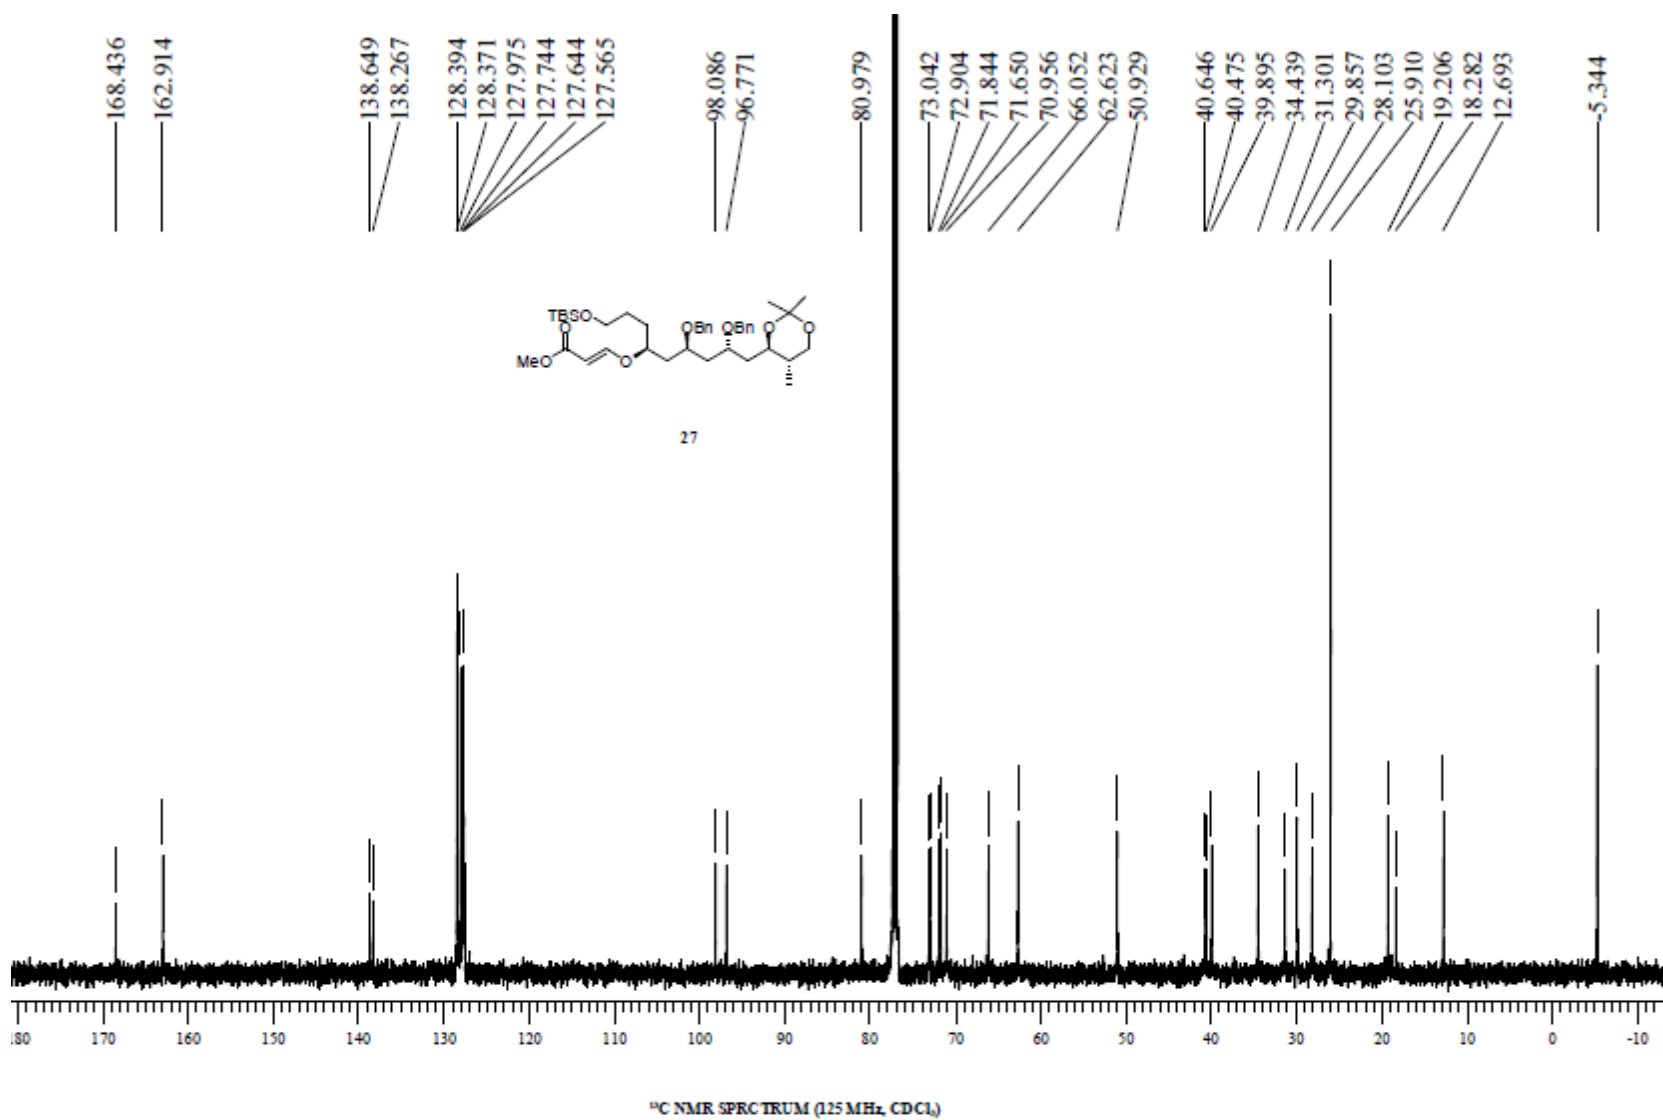

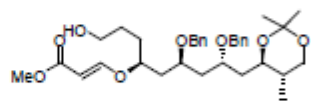

27A

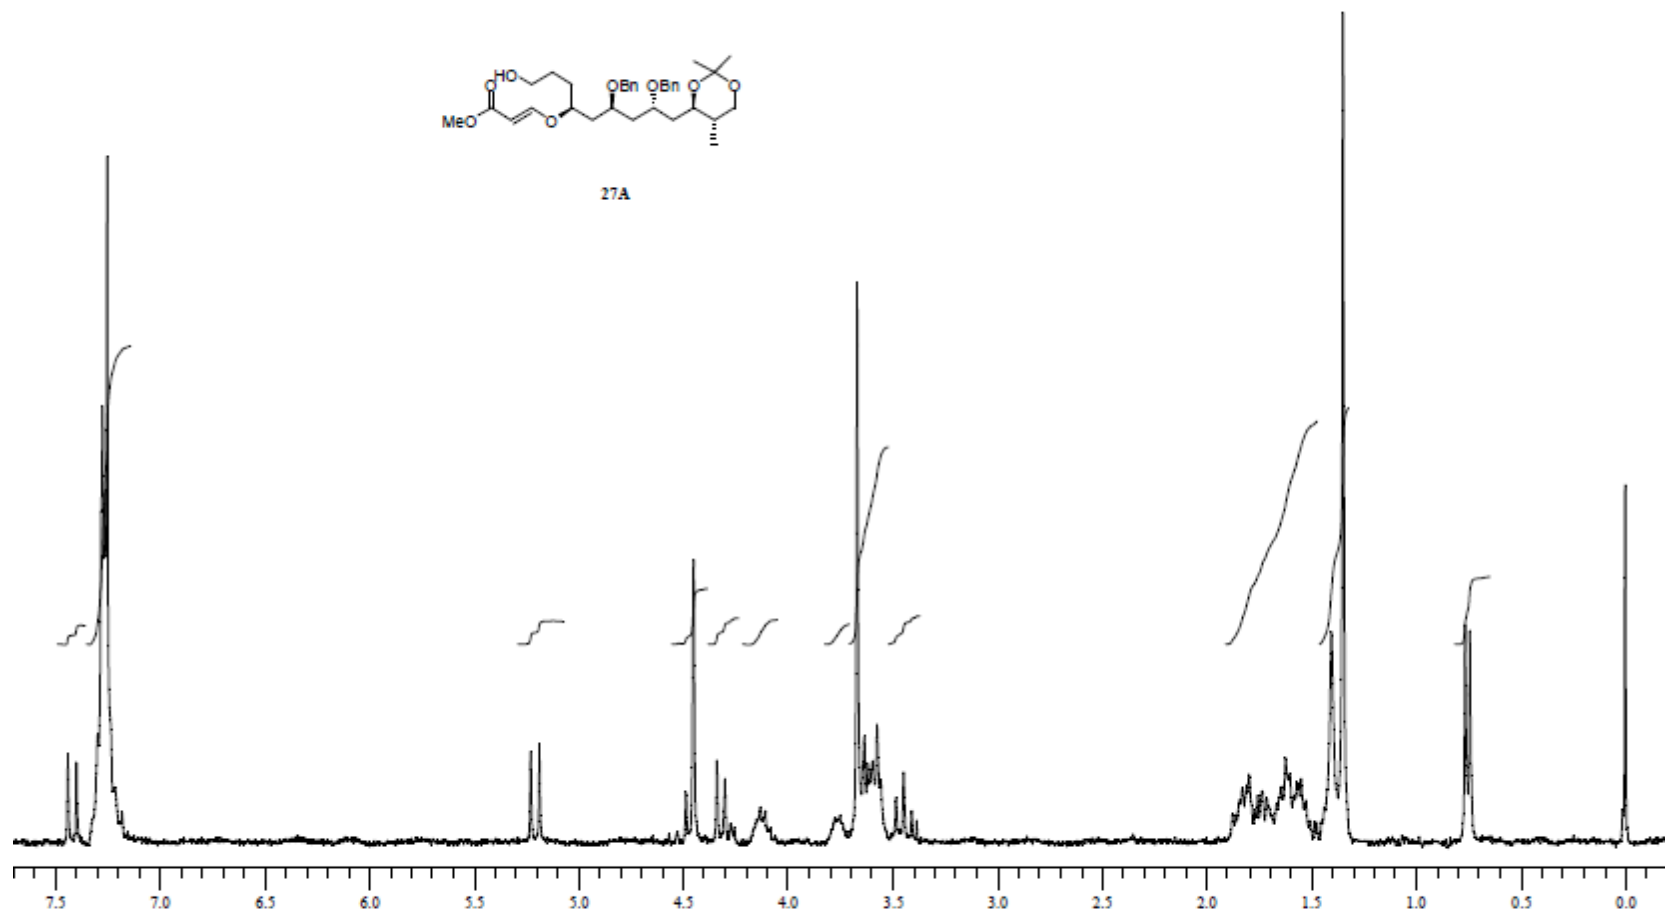

<sup>1</sup>H NMR SPECTRUM (300 MHz, C DCl<sub>3</sub>)

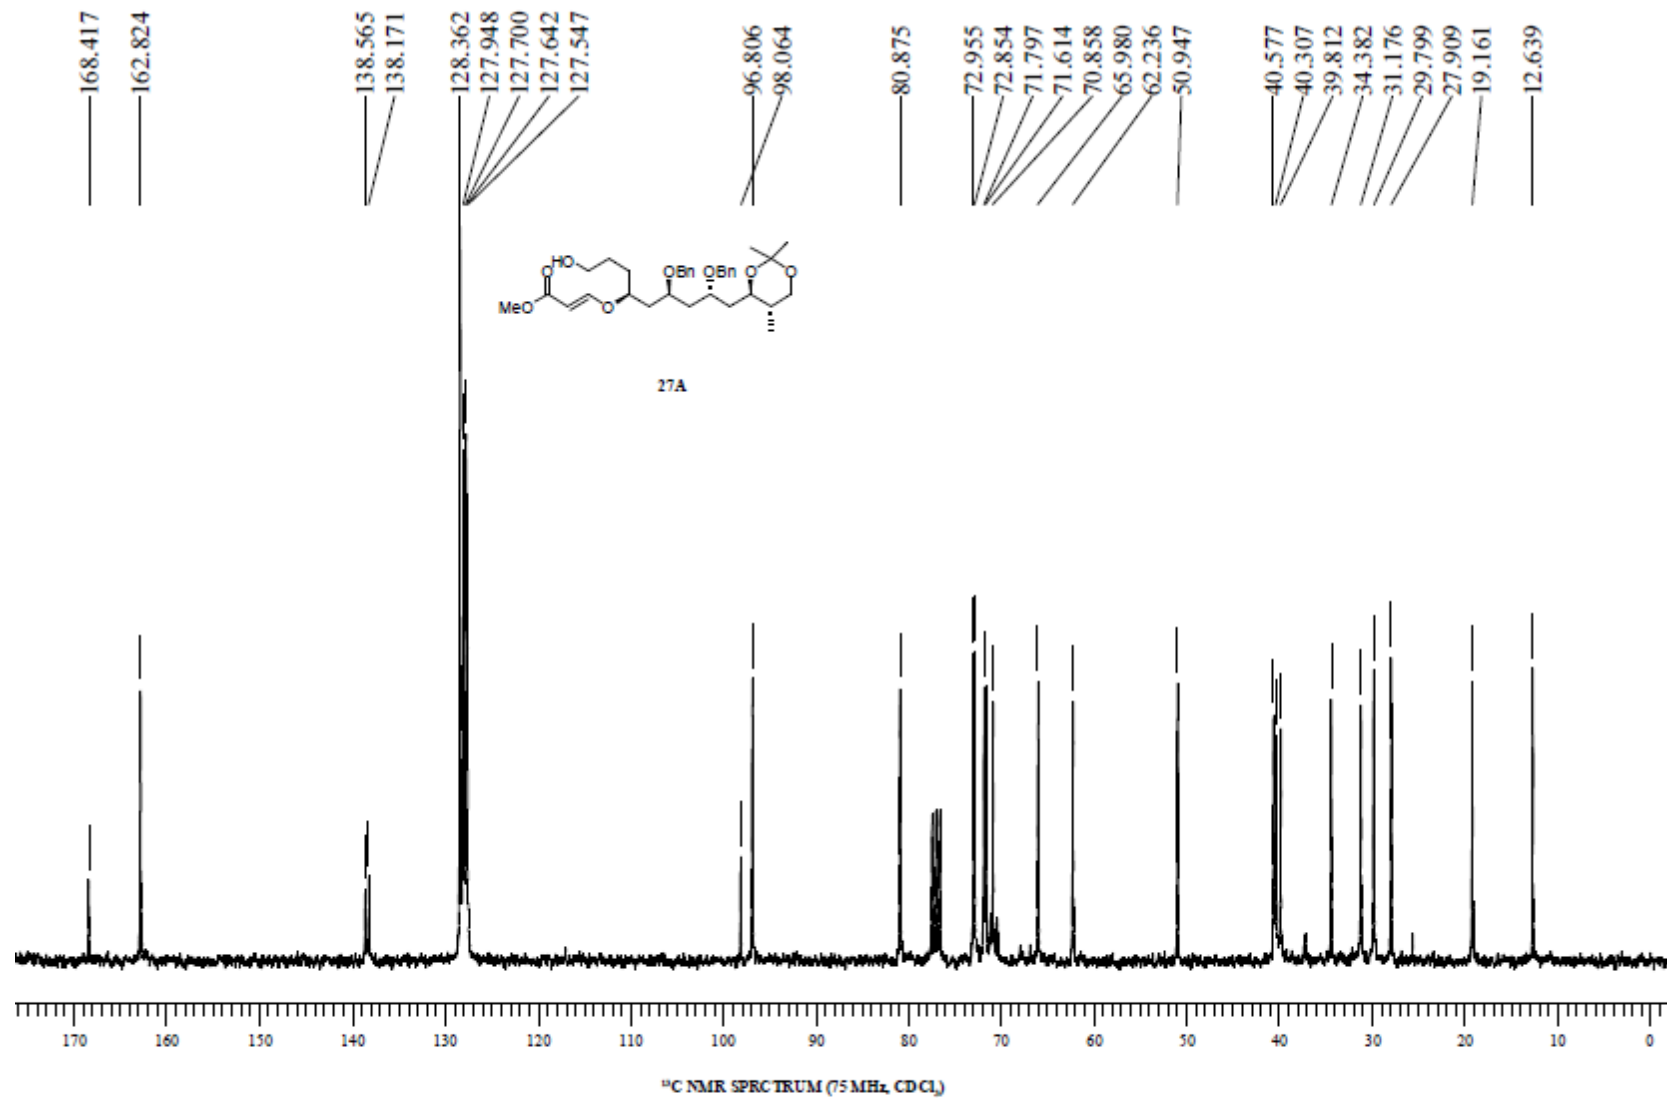

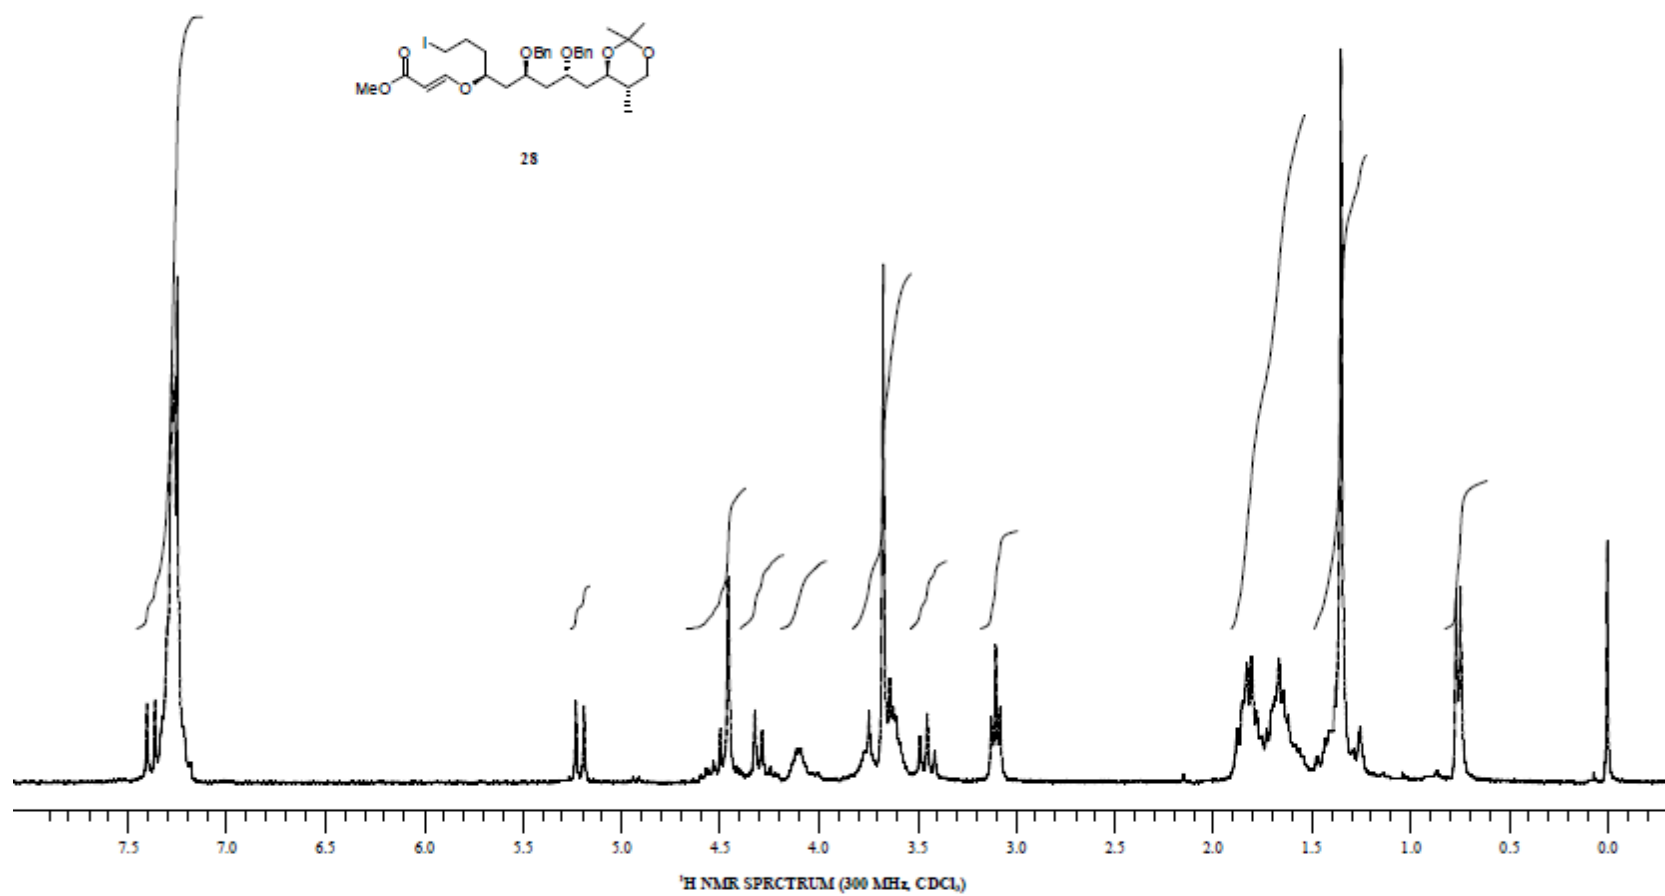

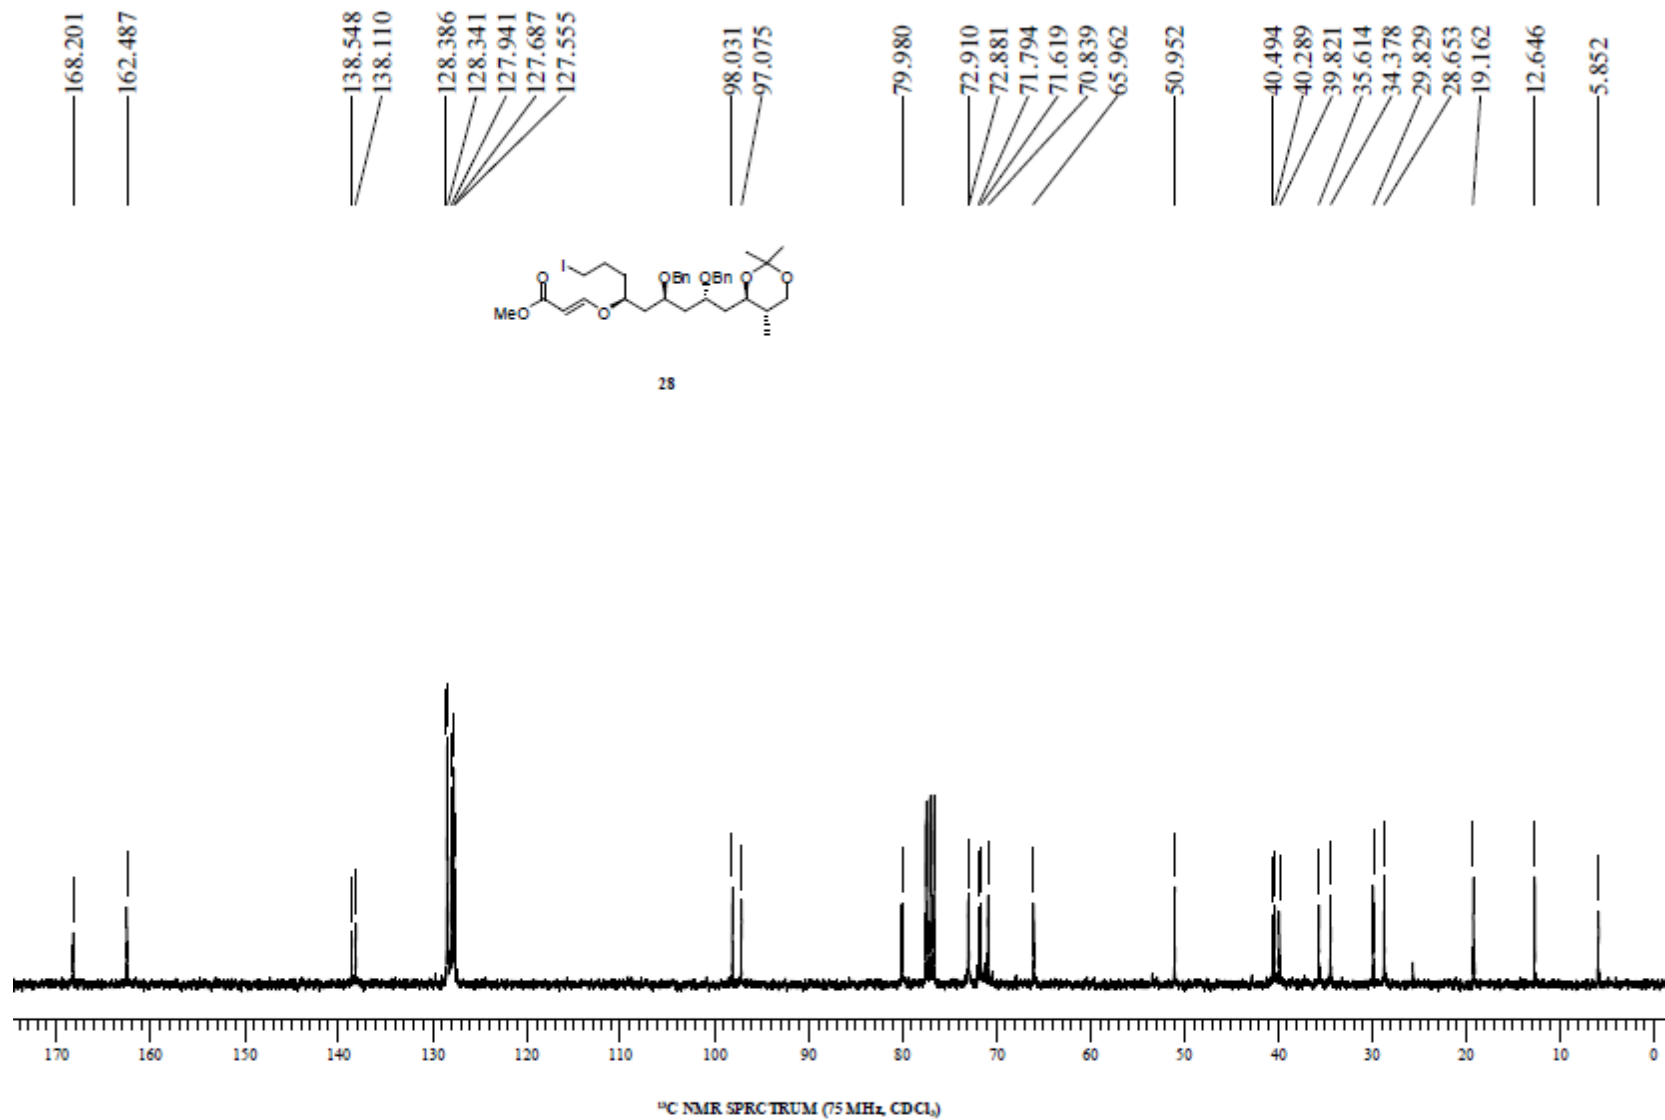

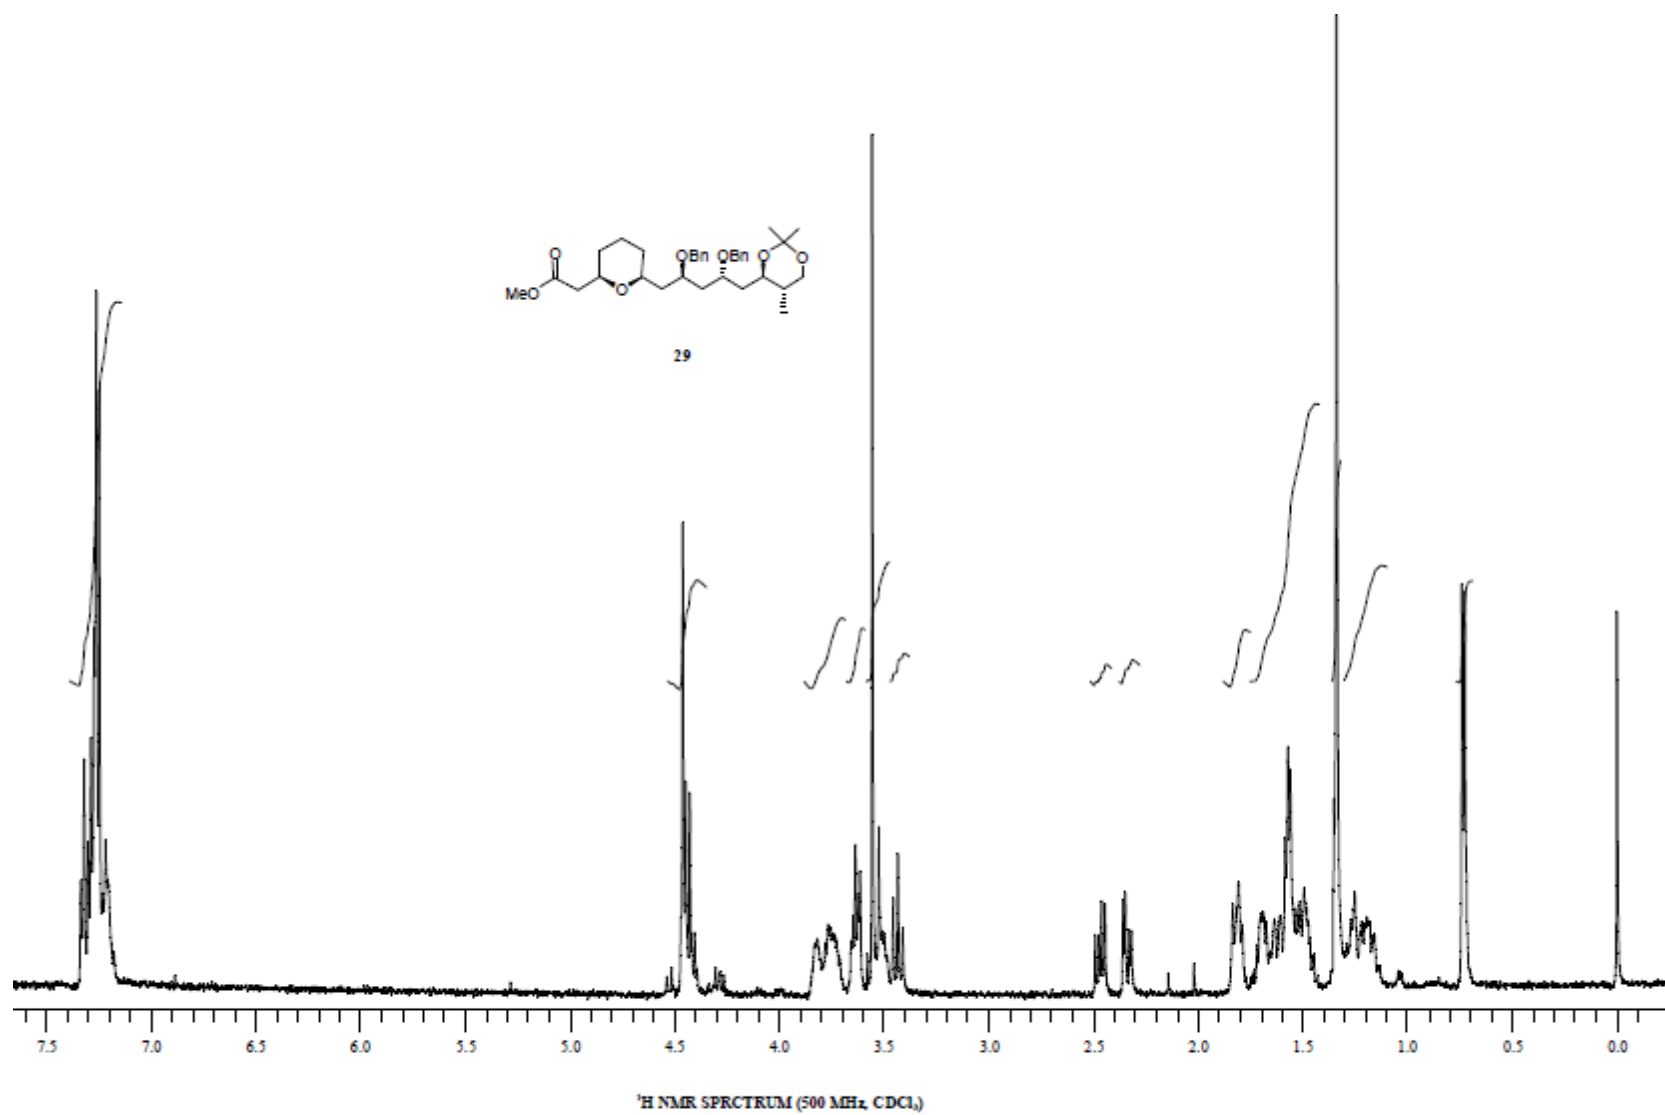



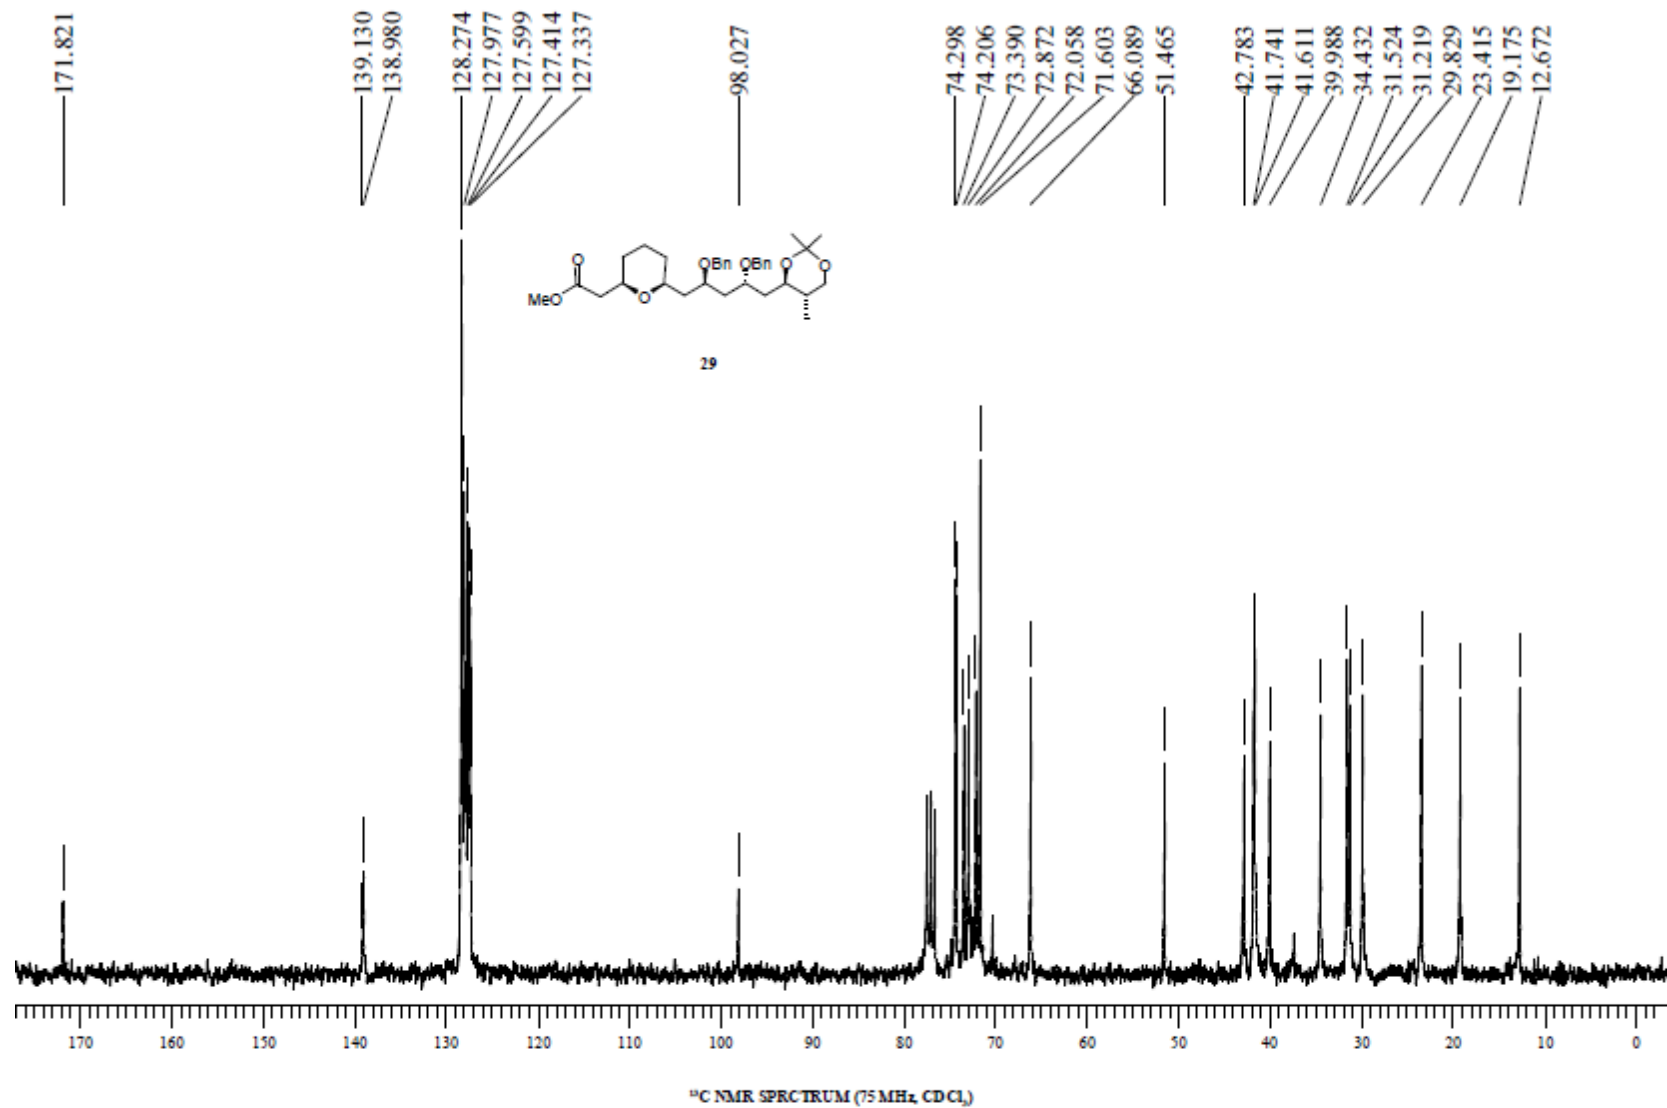

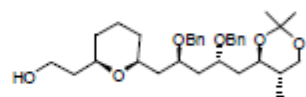

29A

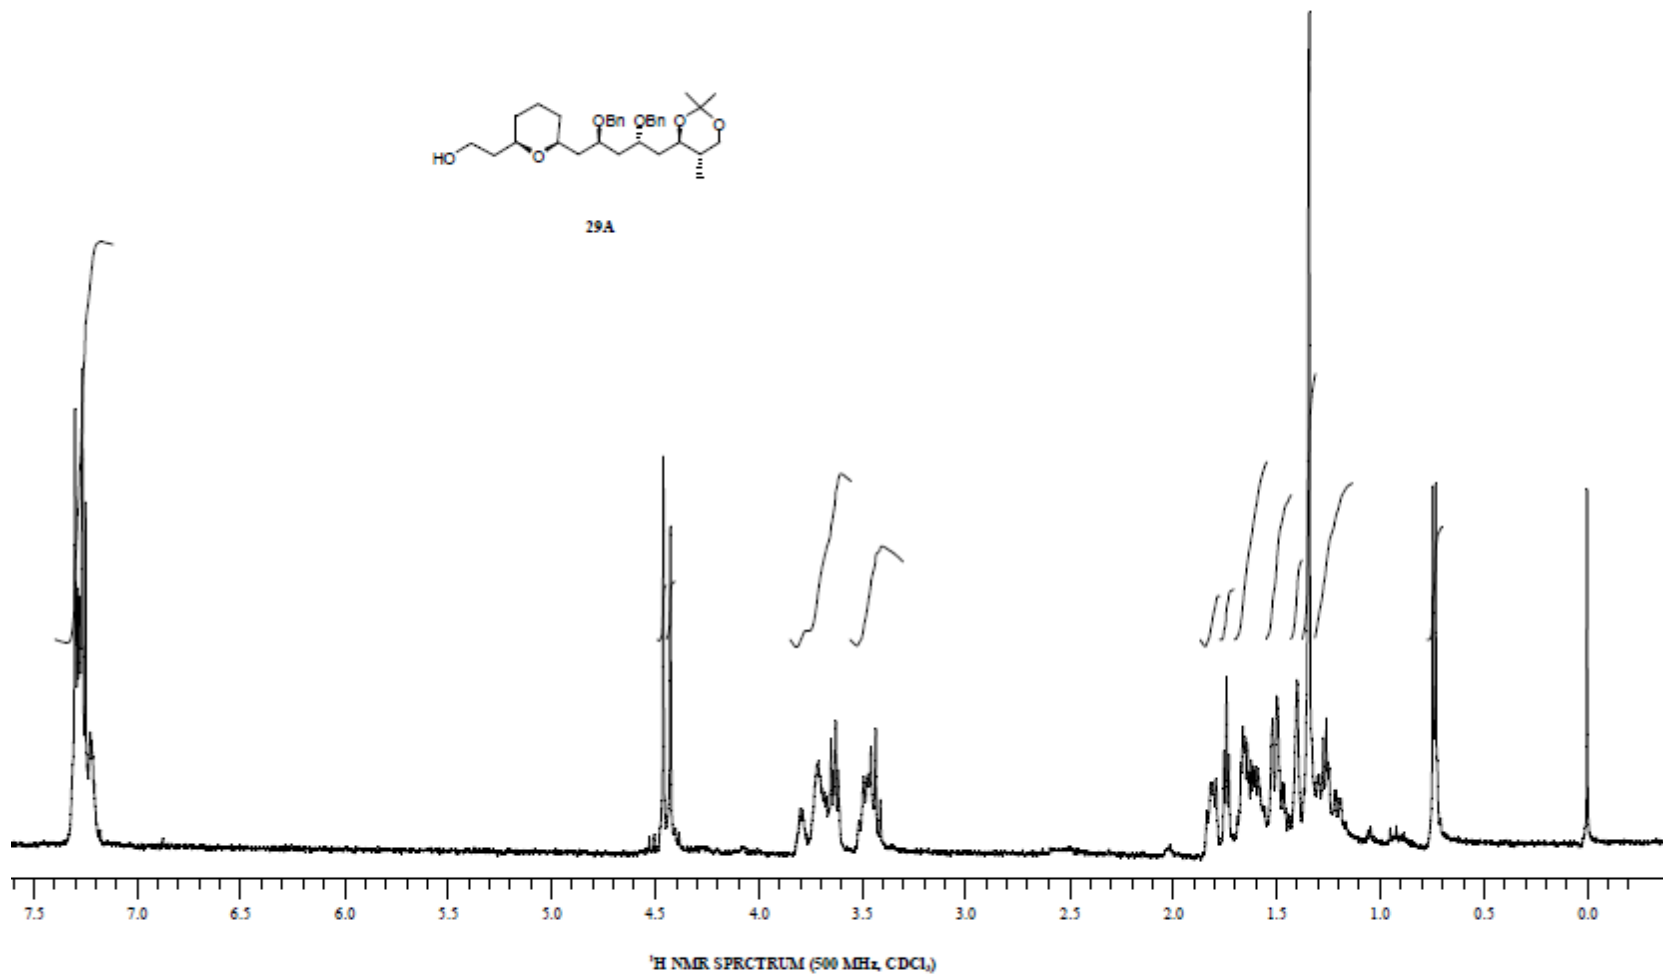



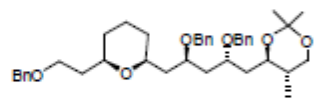

30

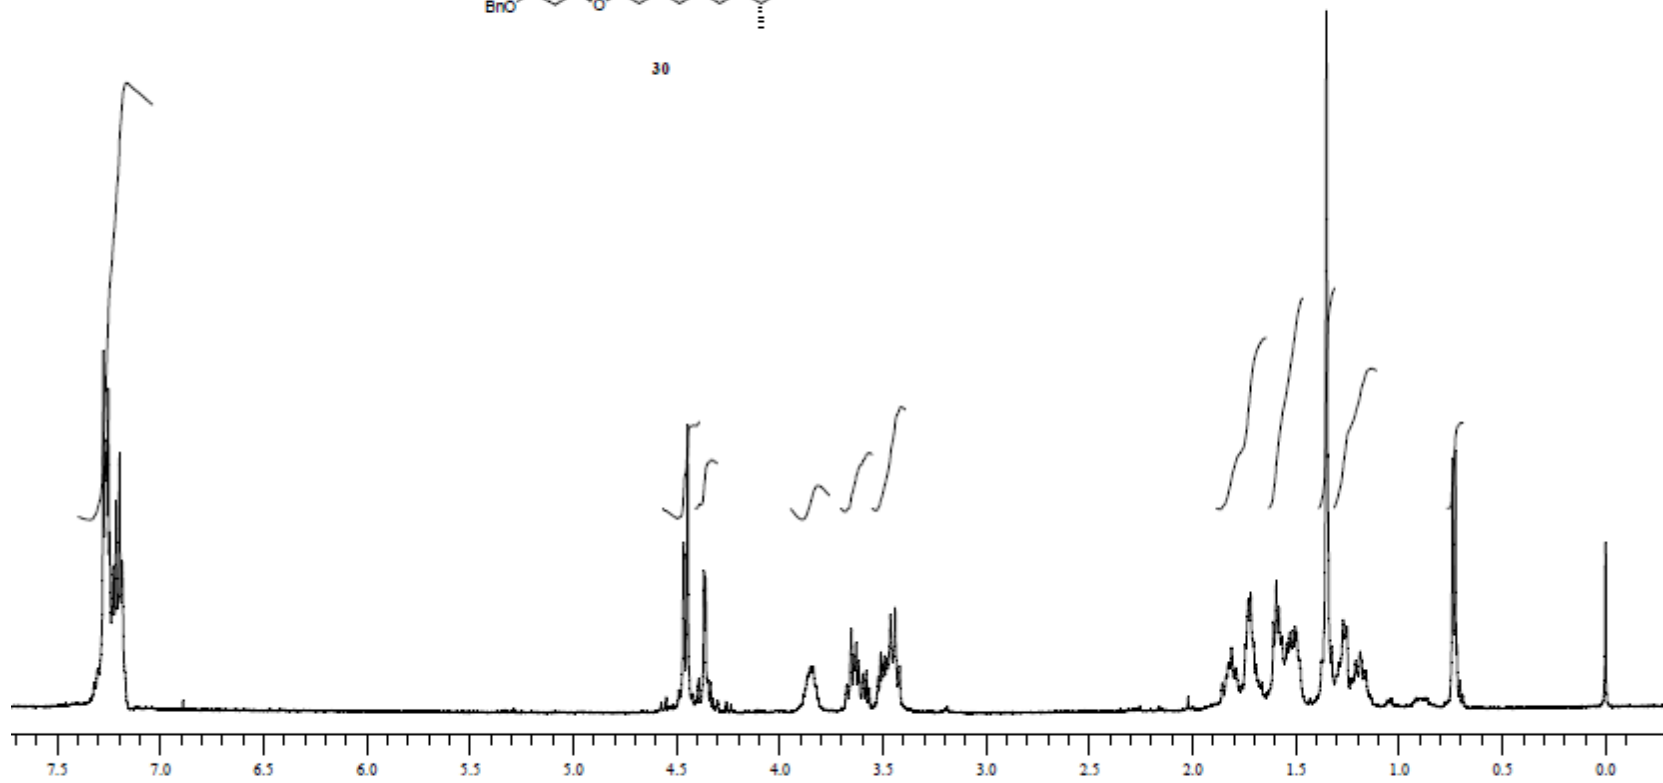

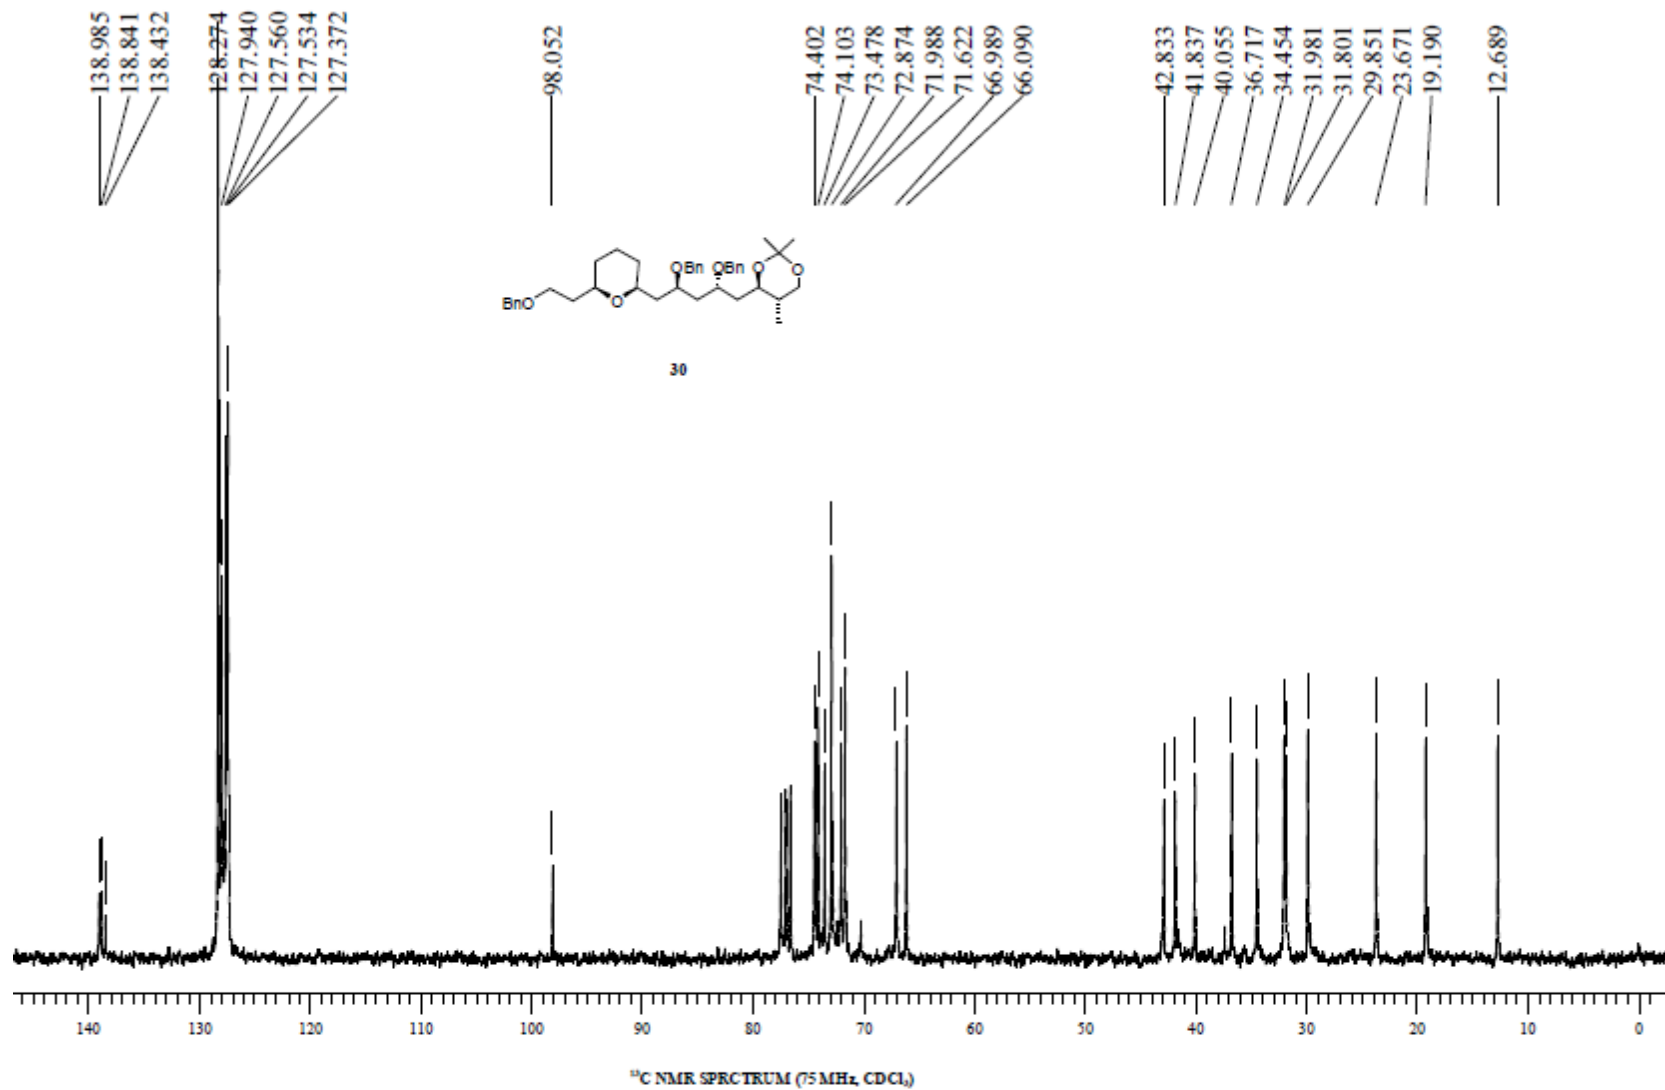

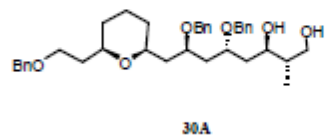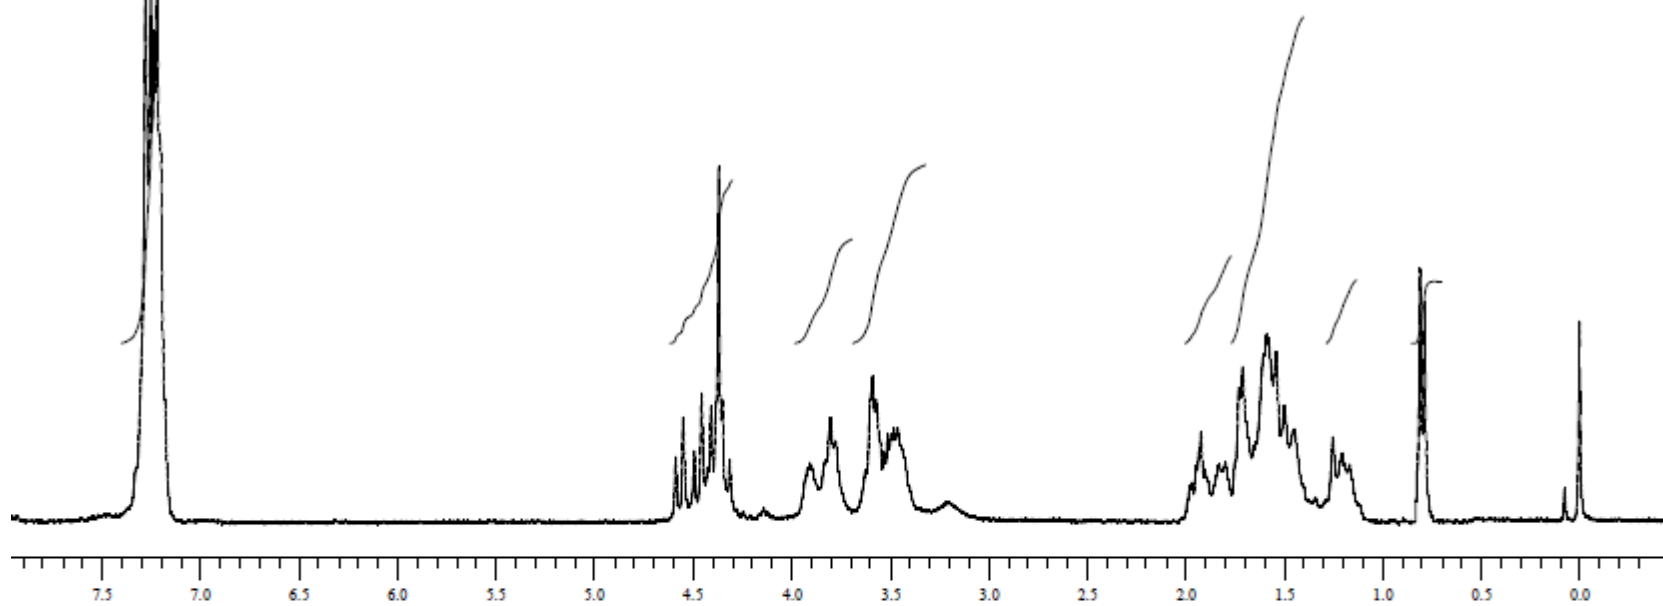

<sup>1</sup>H NMR SPECTRUM (300 MHz, CDCl<sub>3</sub>)

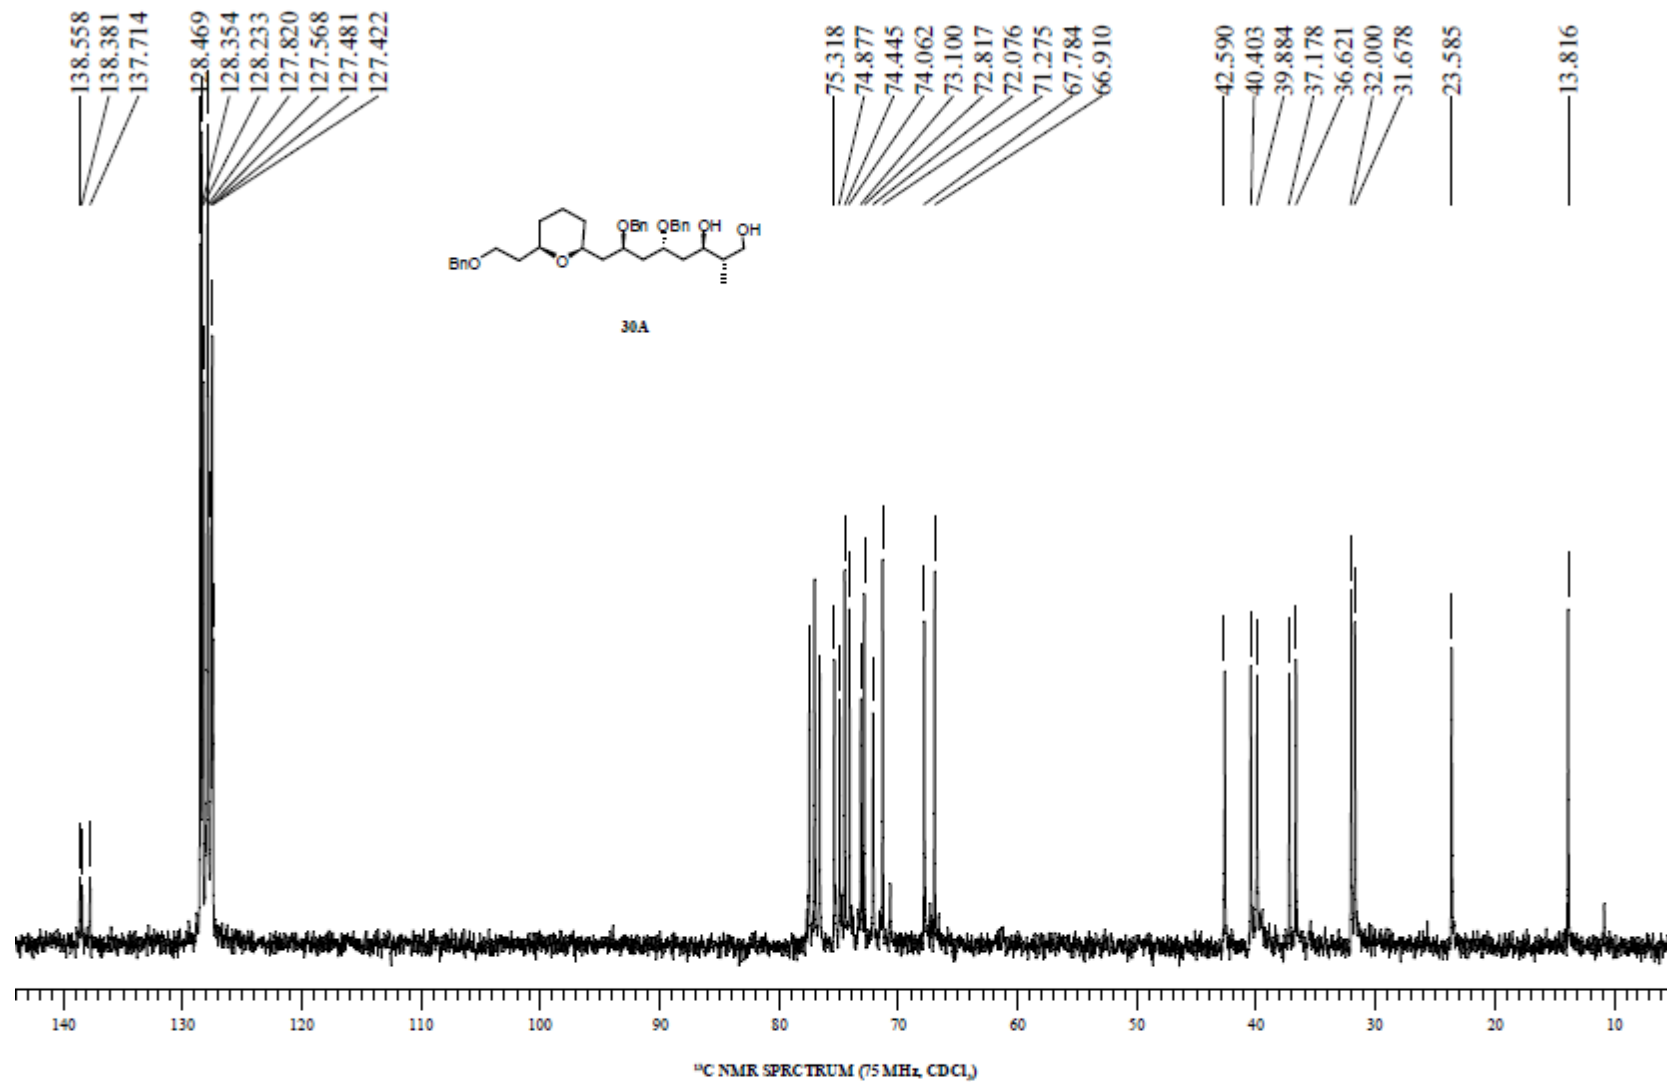





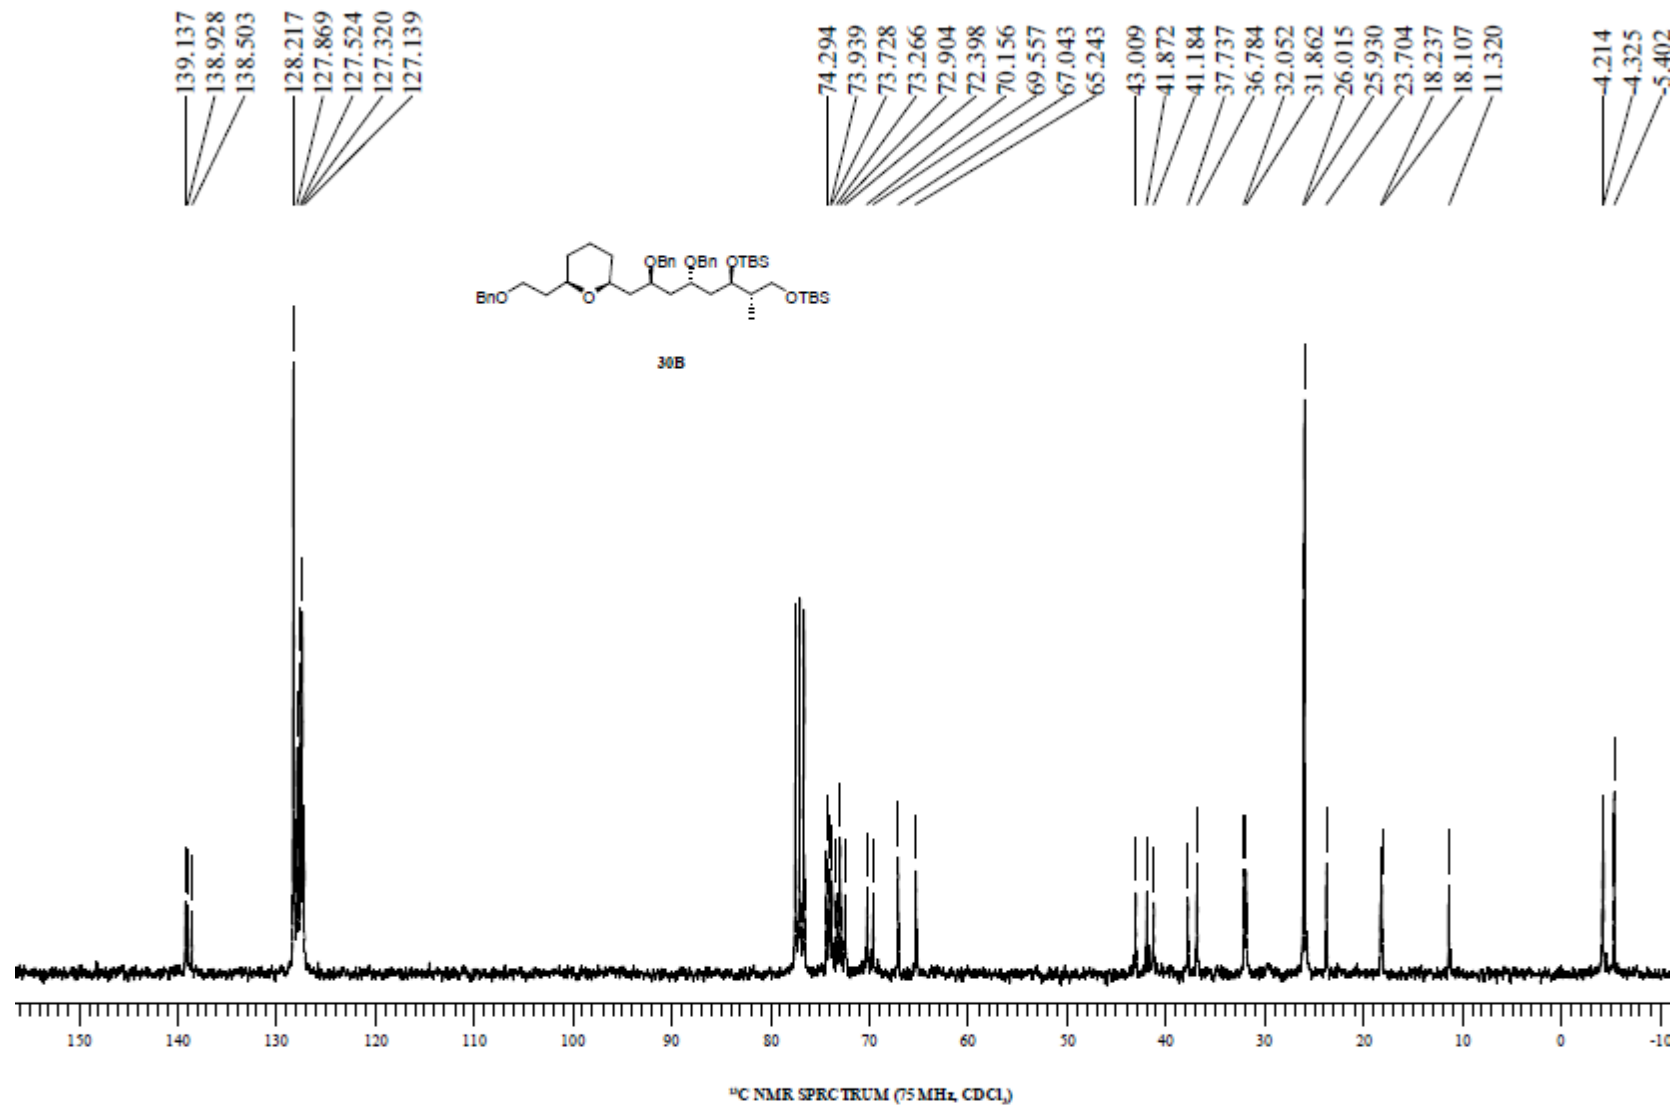



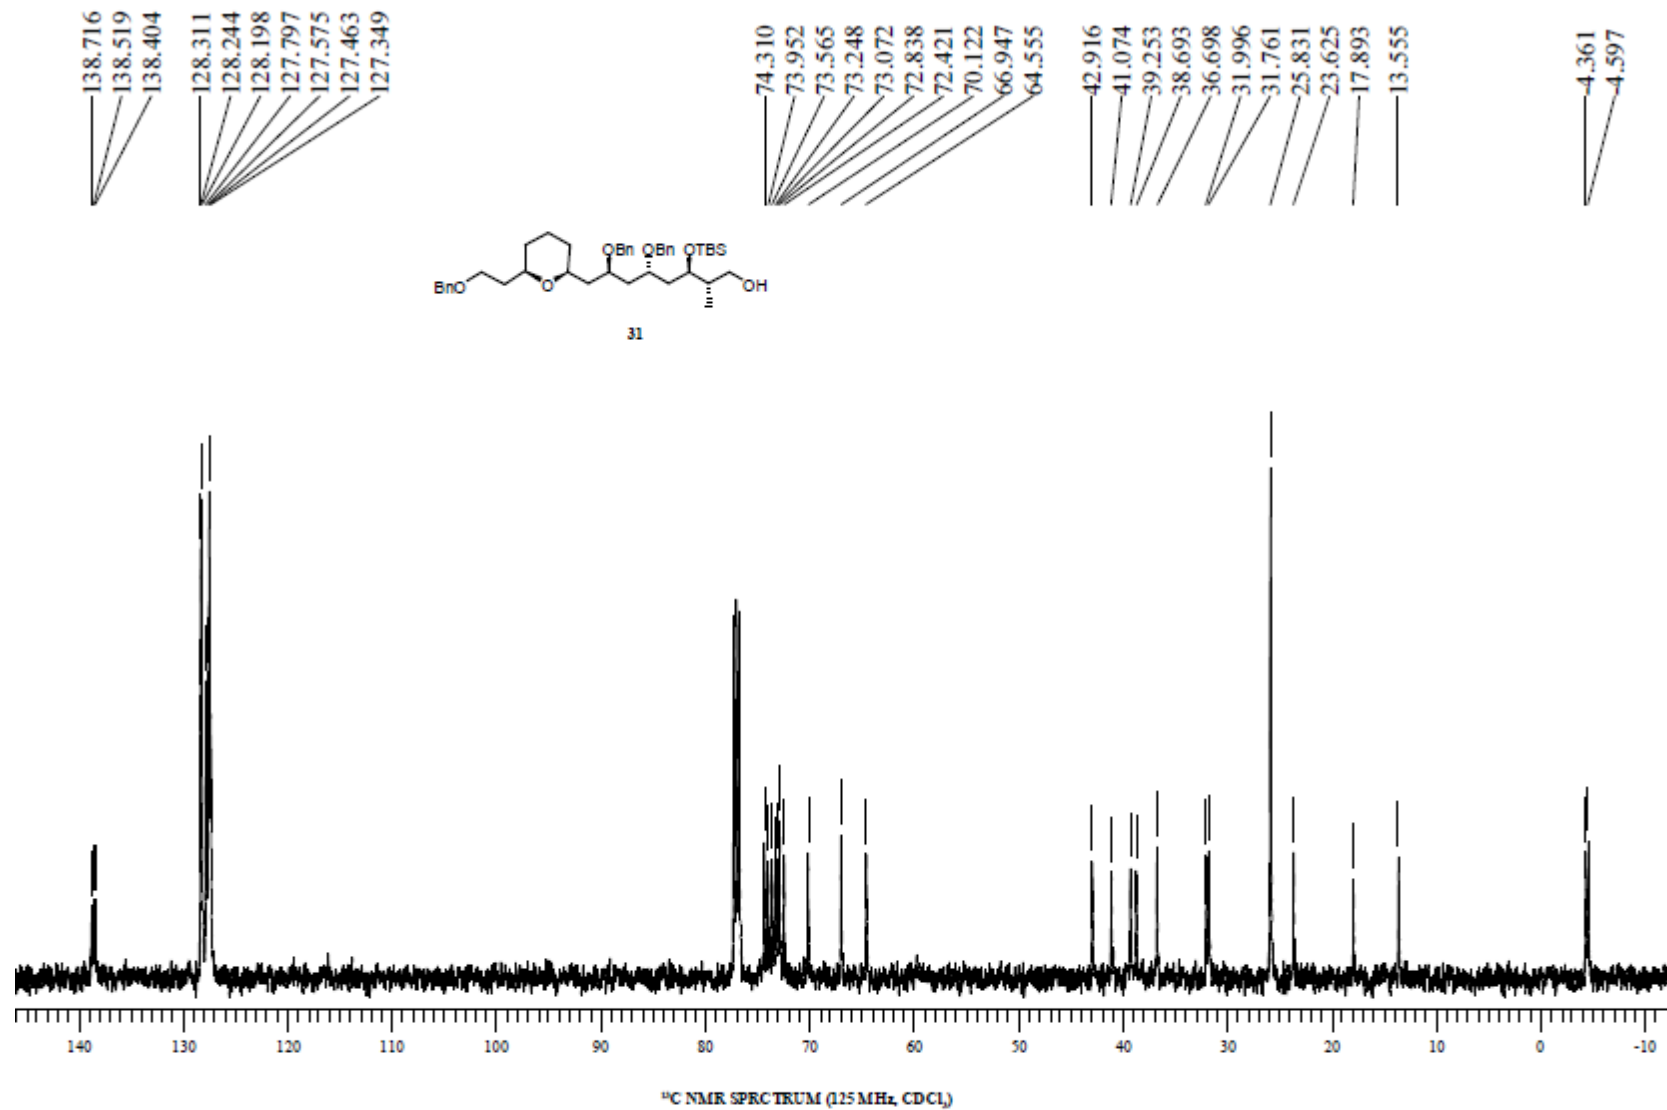

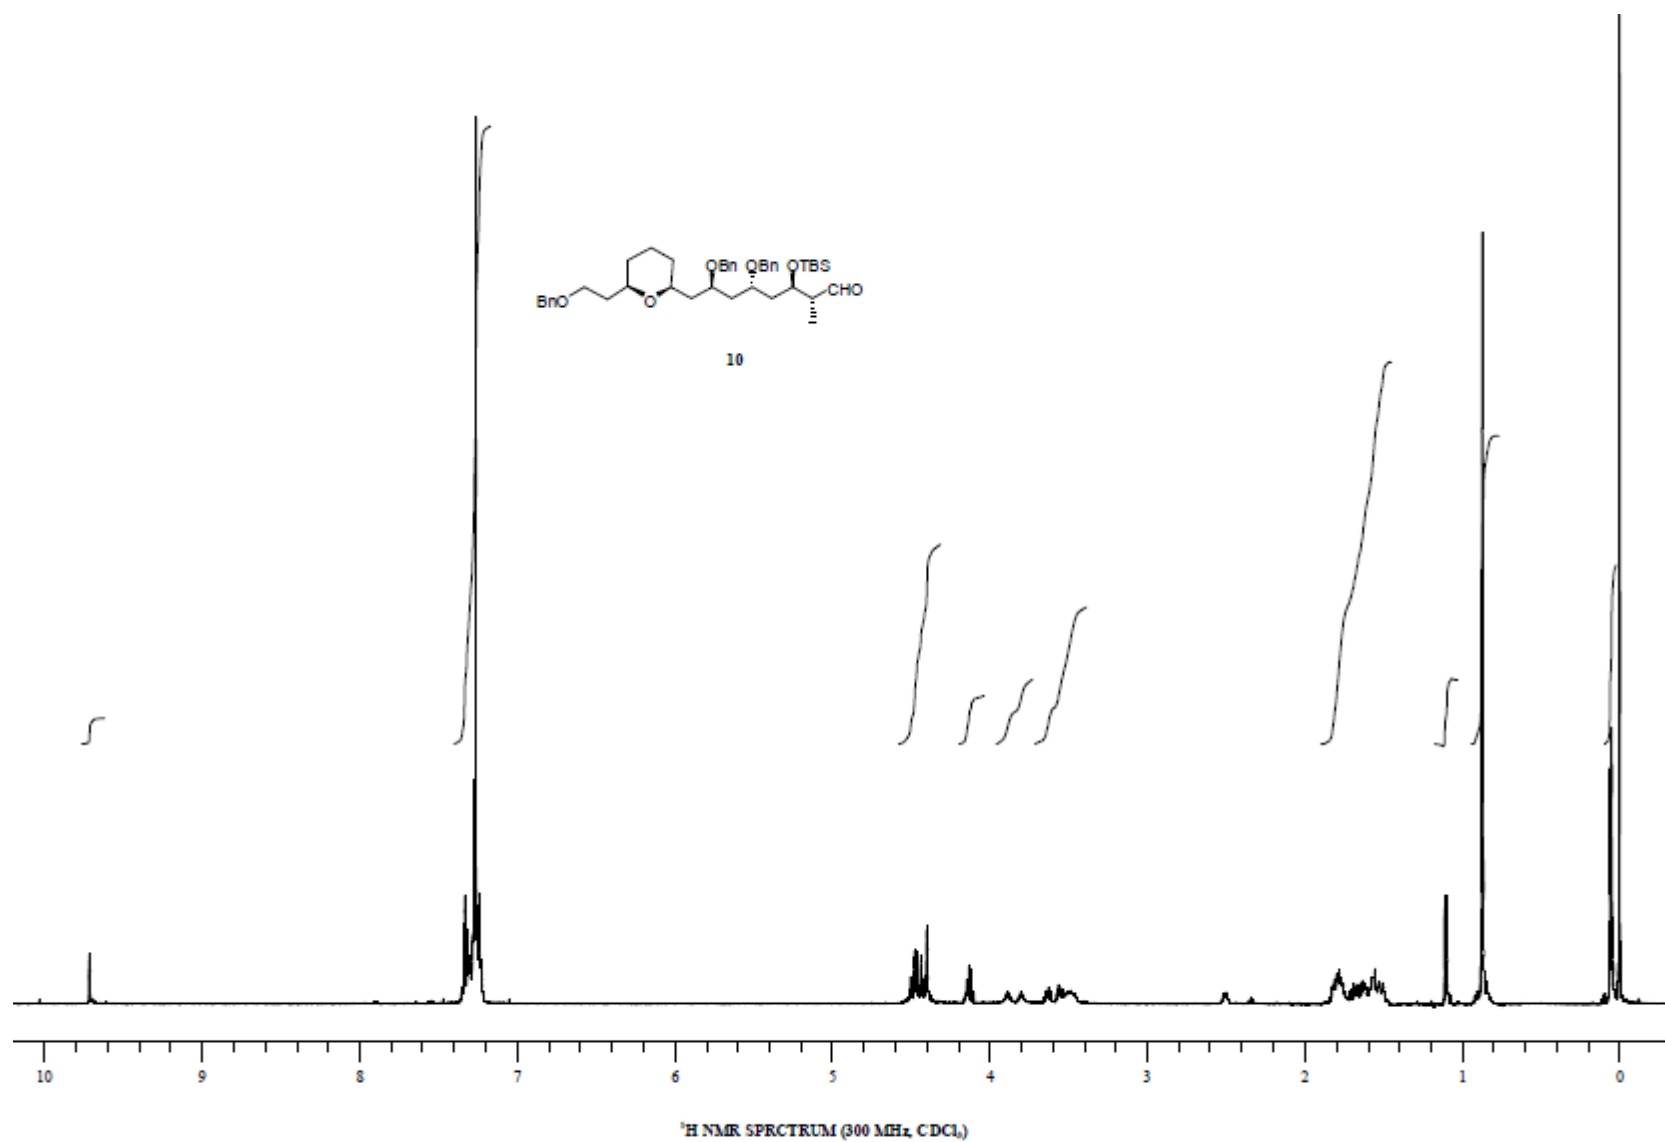

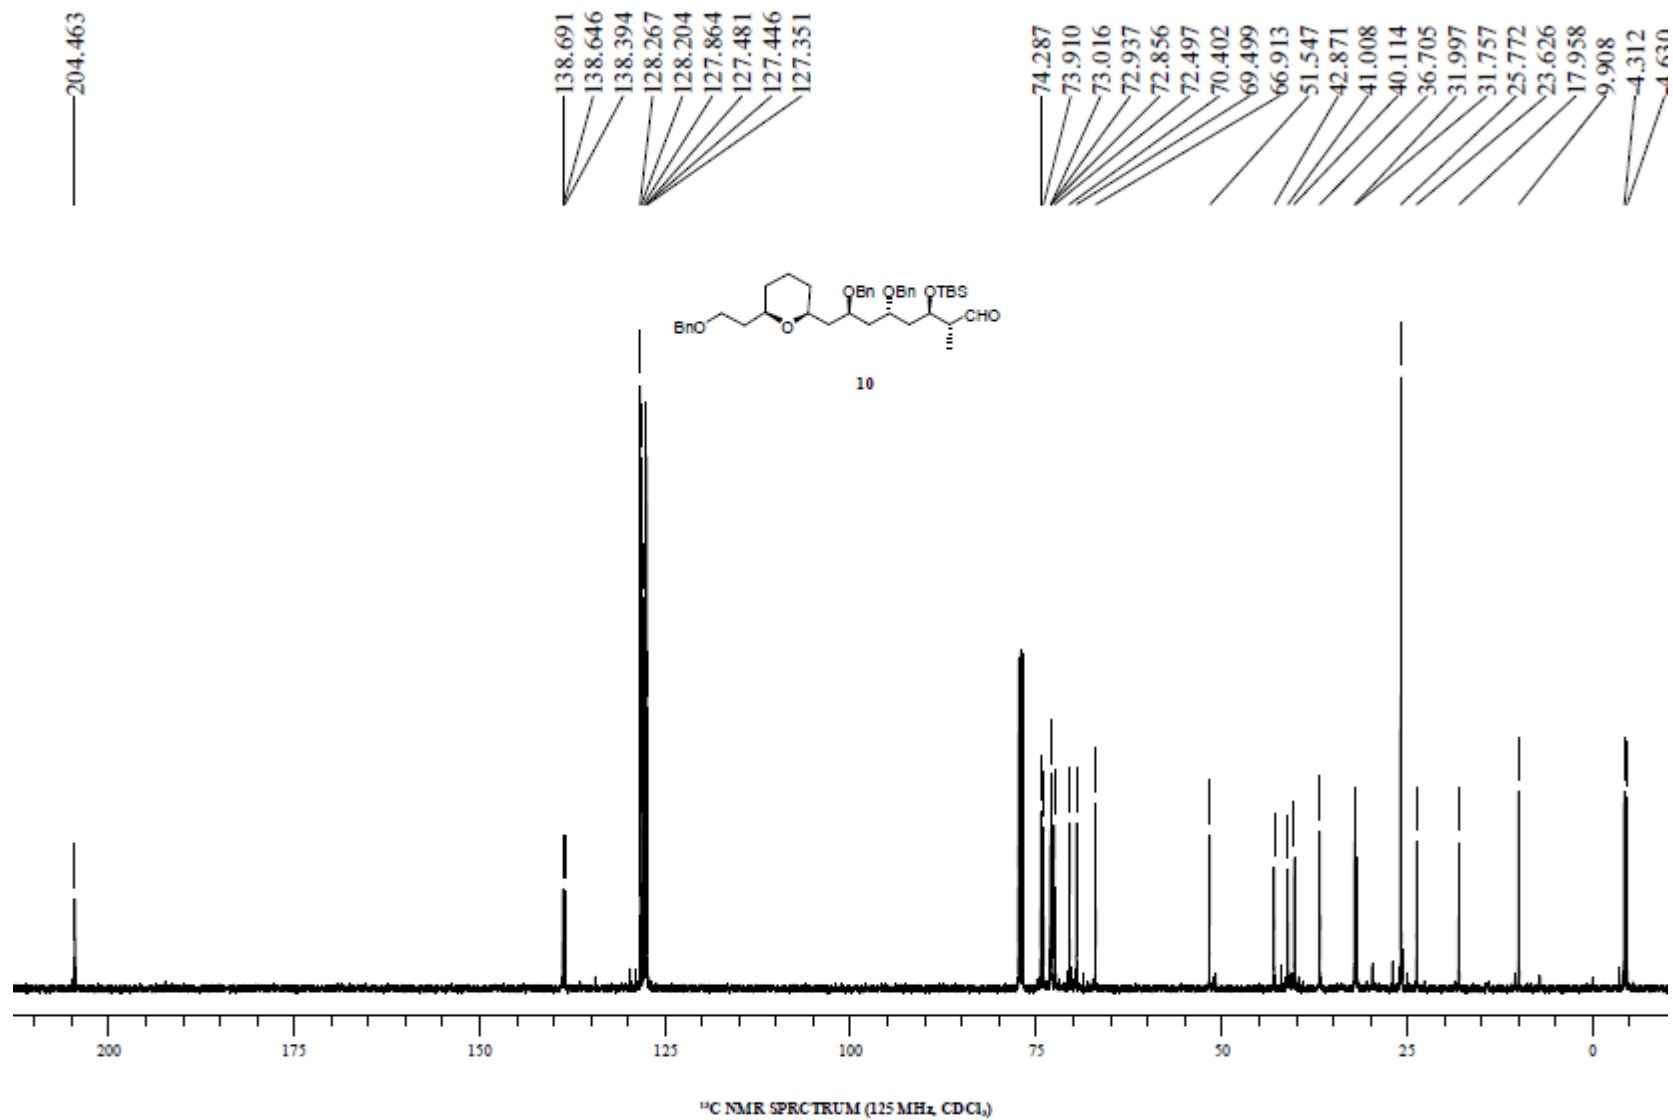

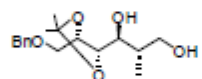

13A

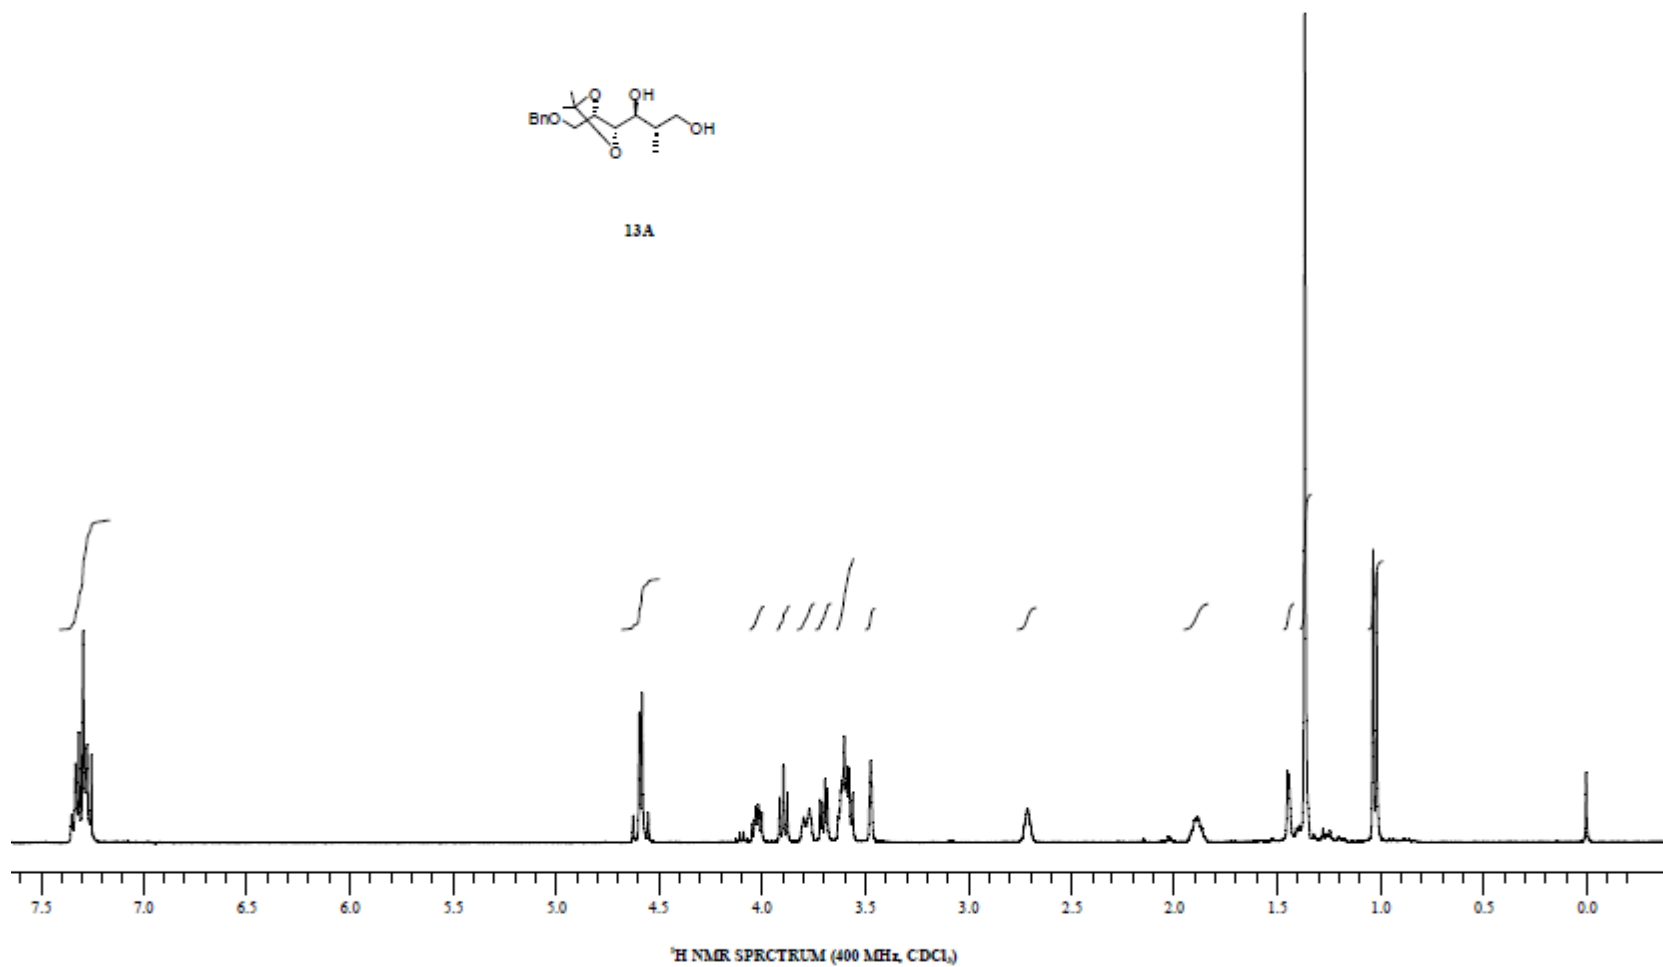

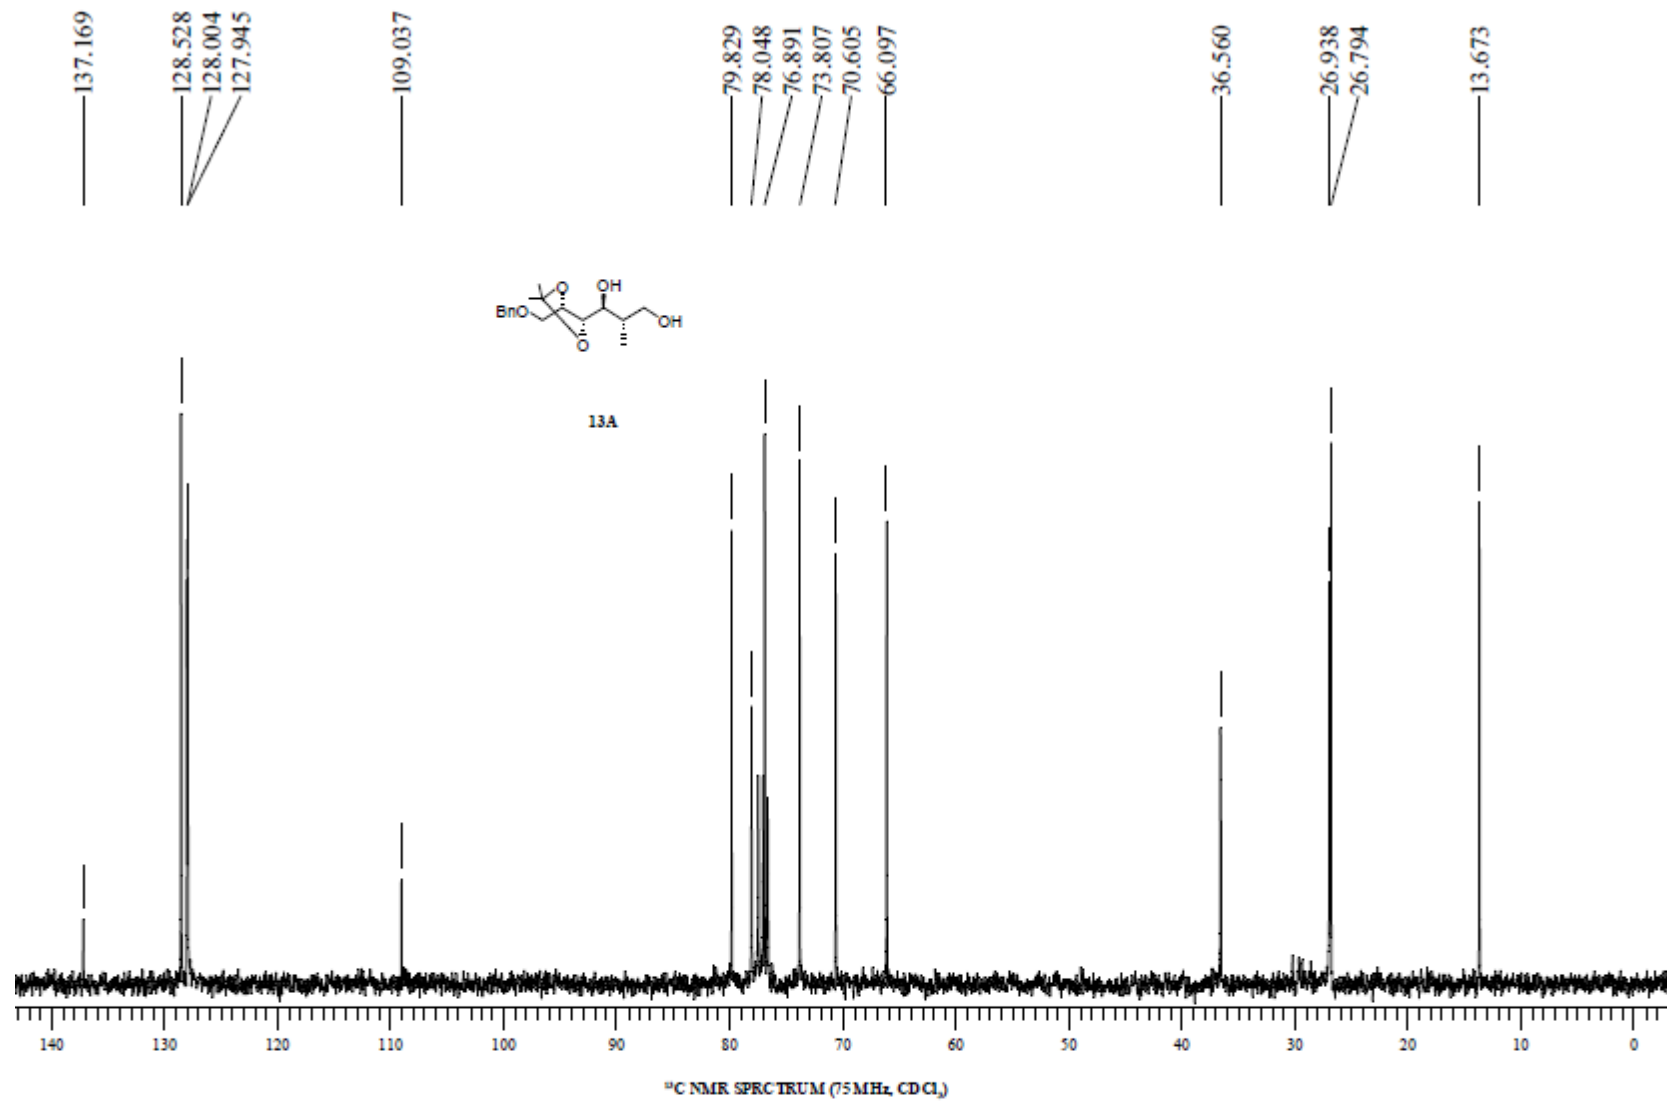

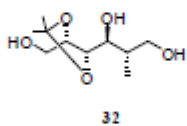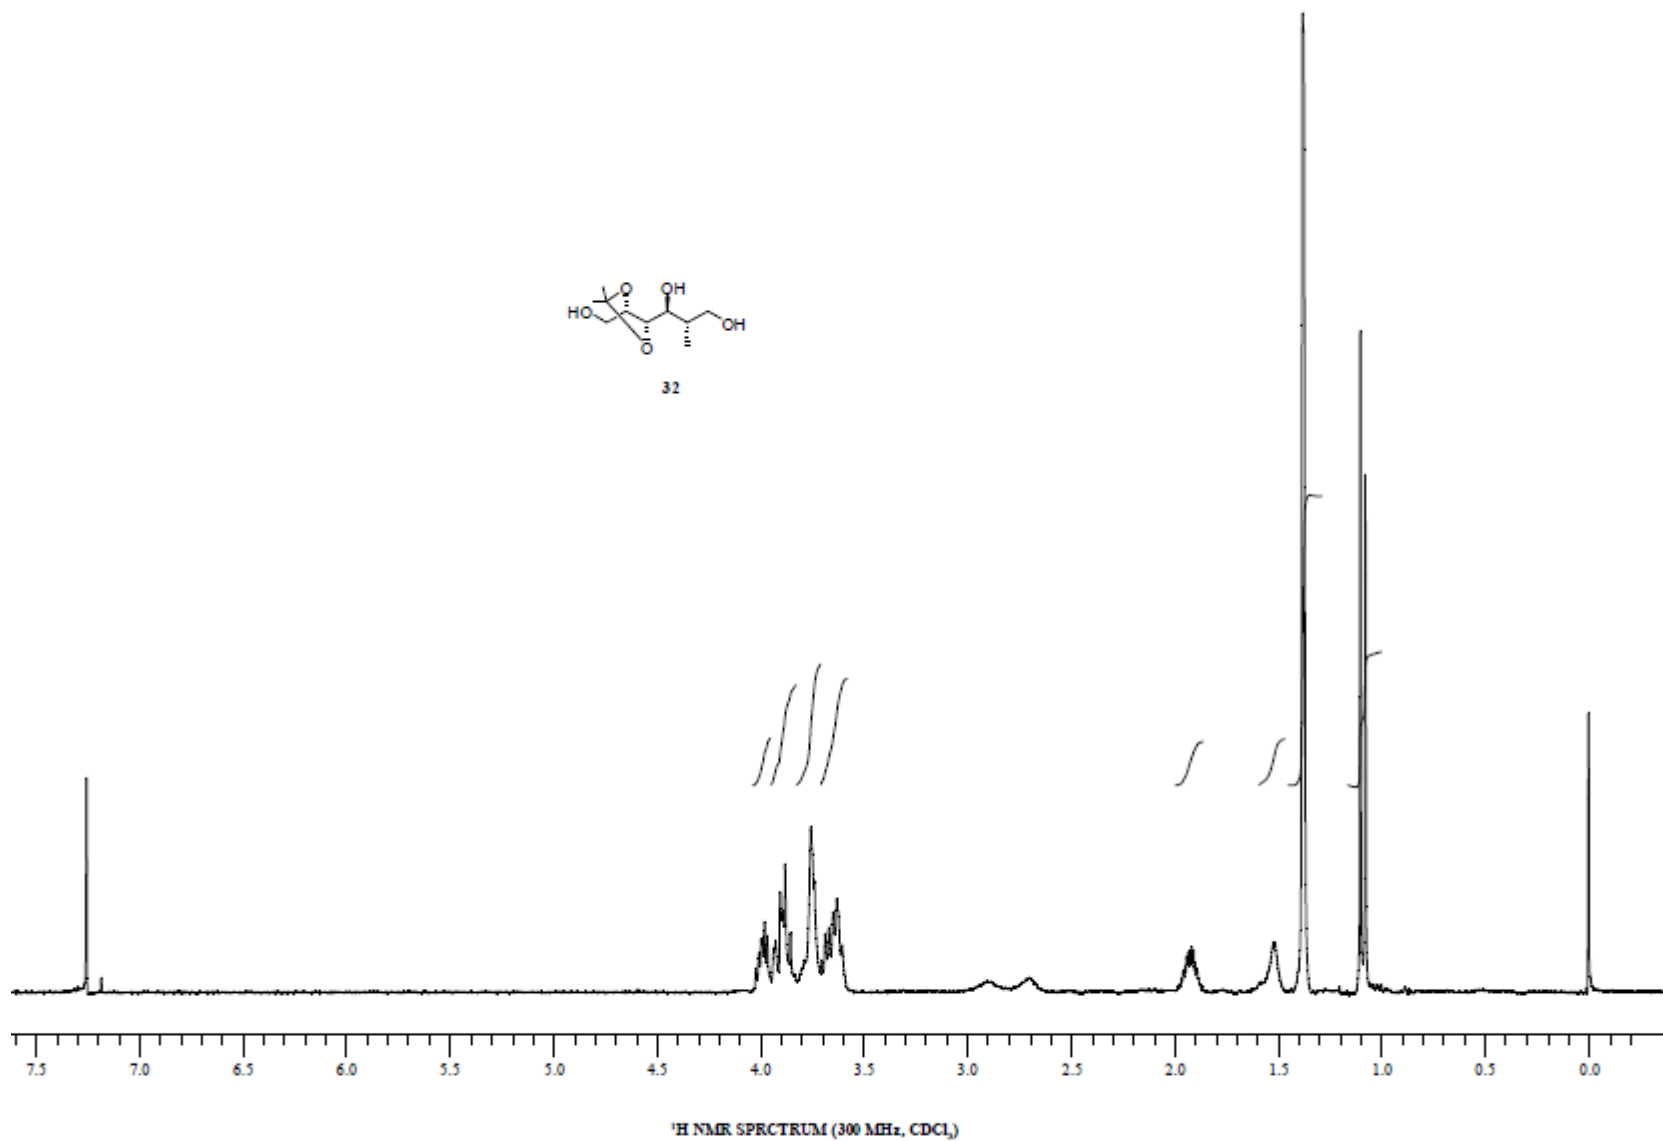



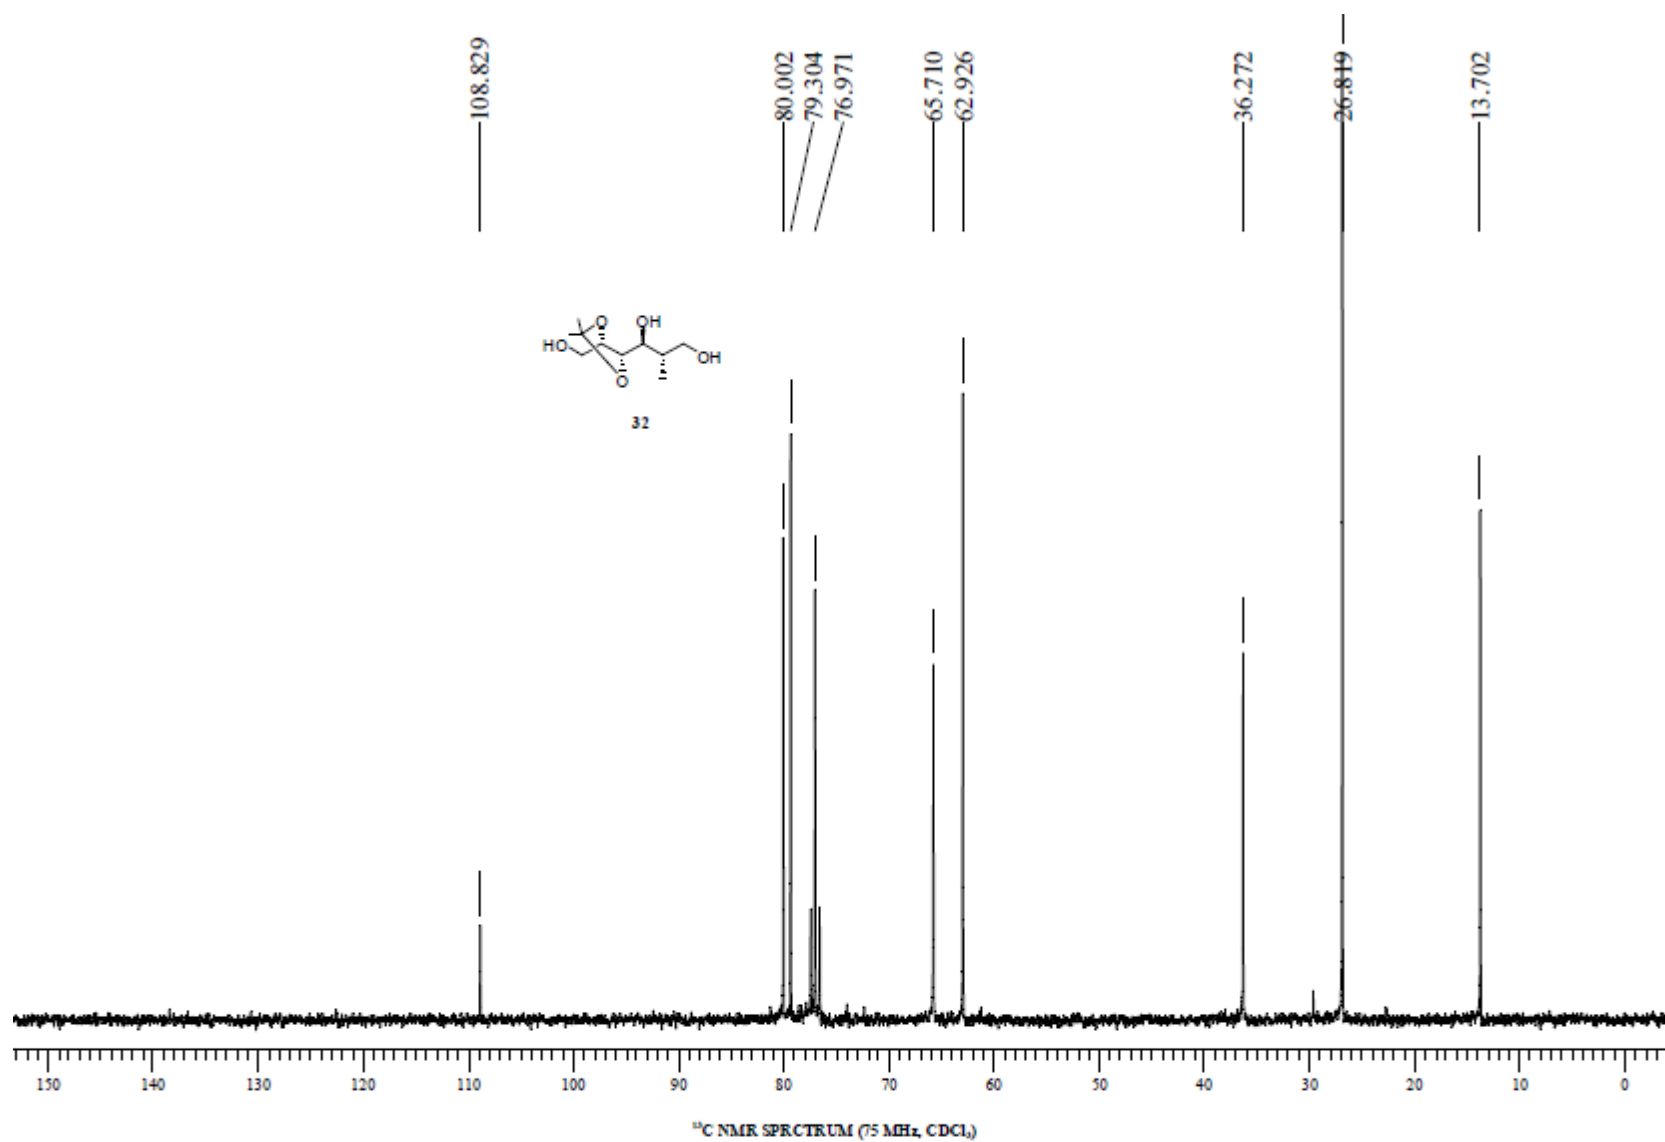

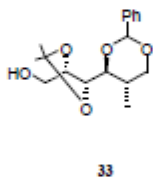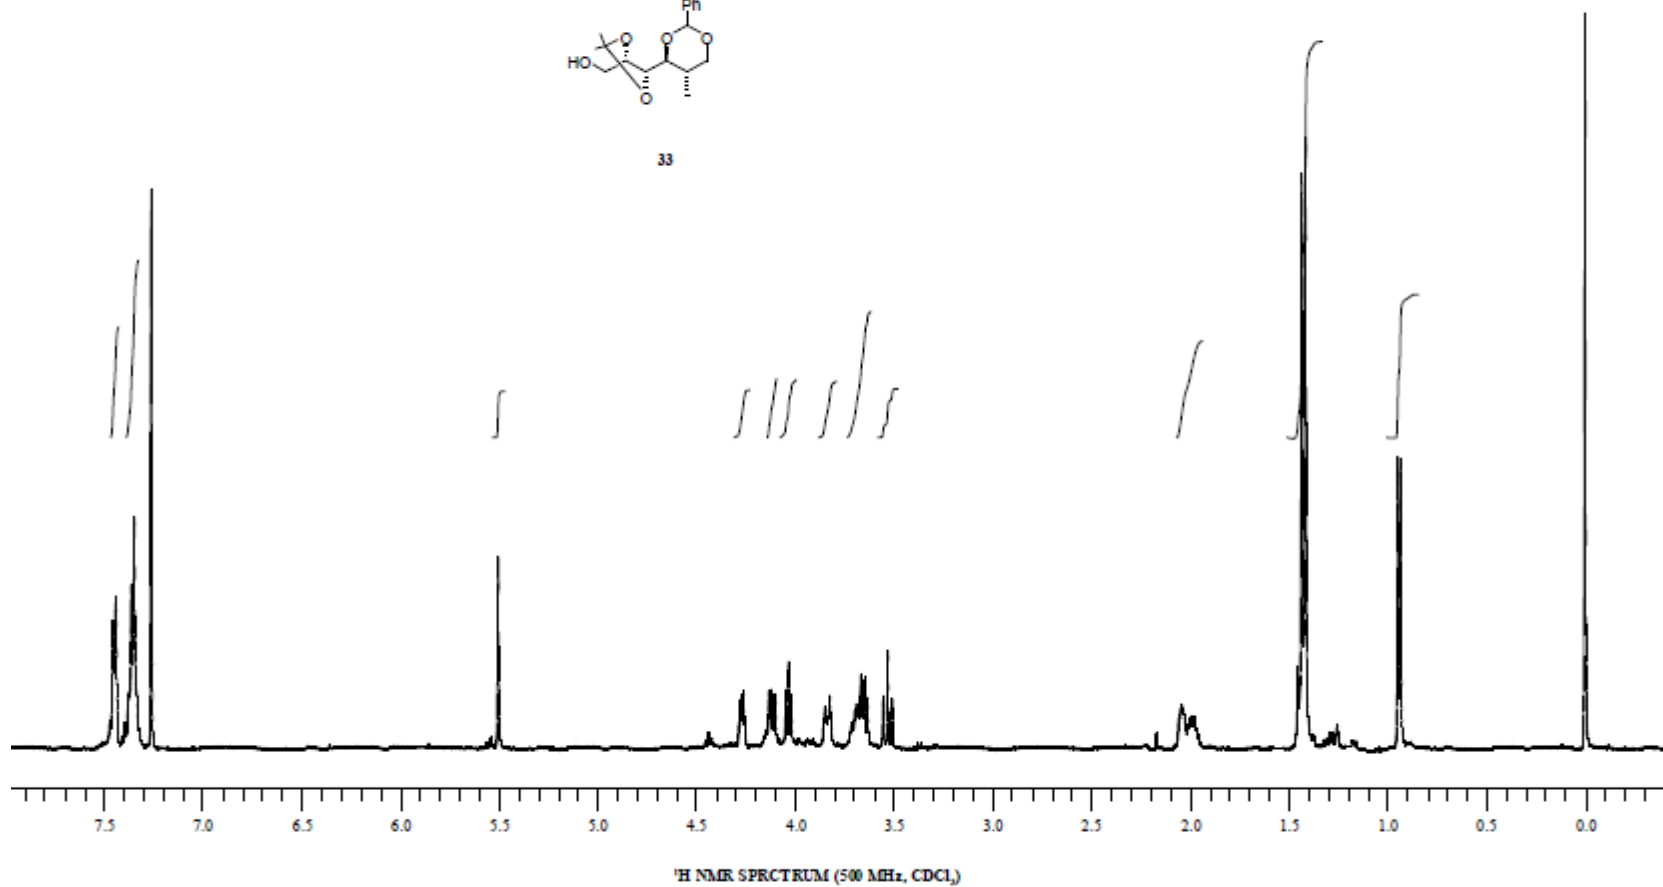

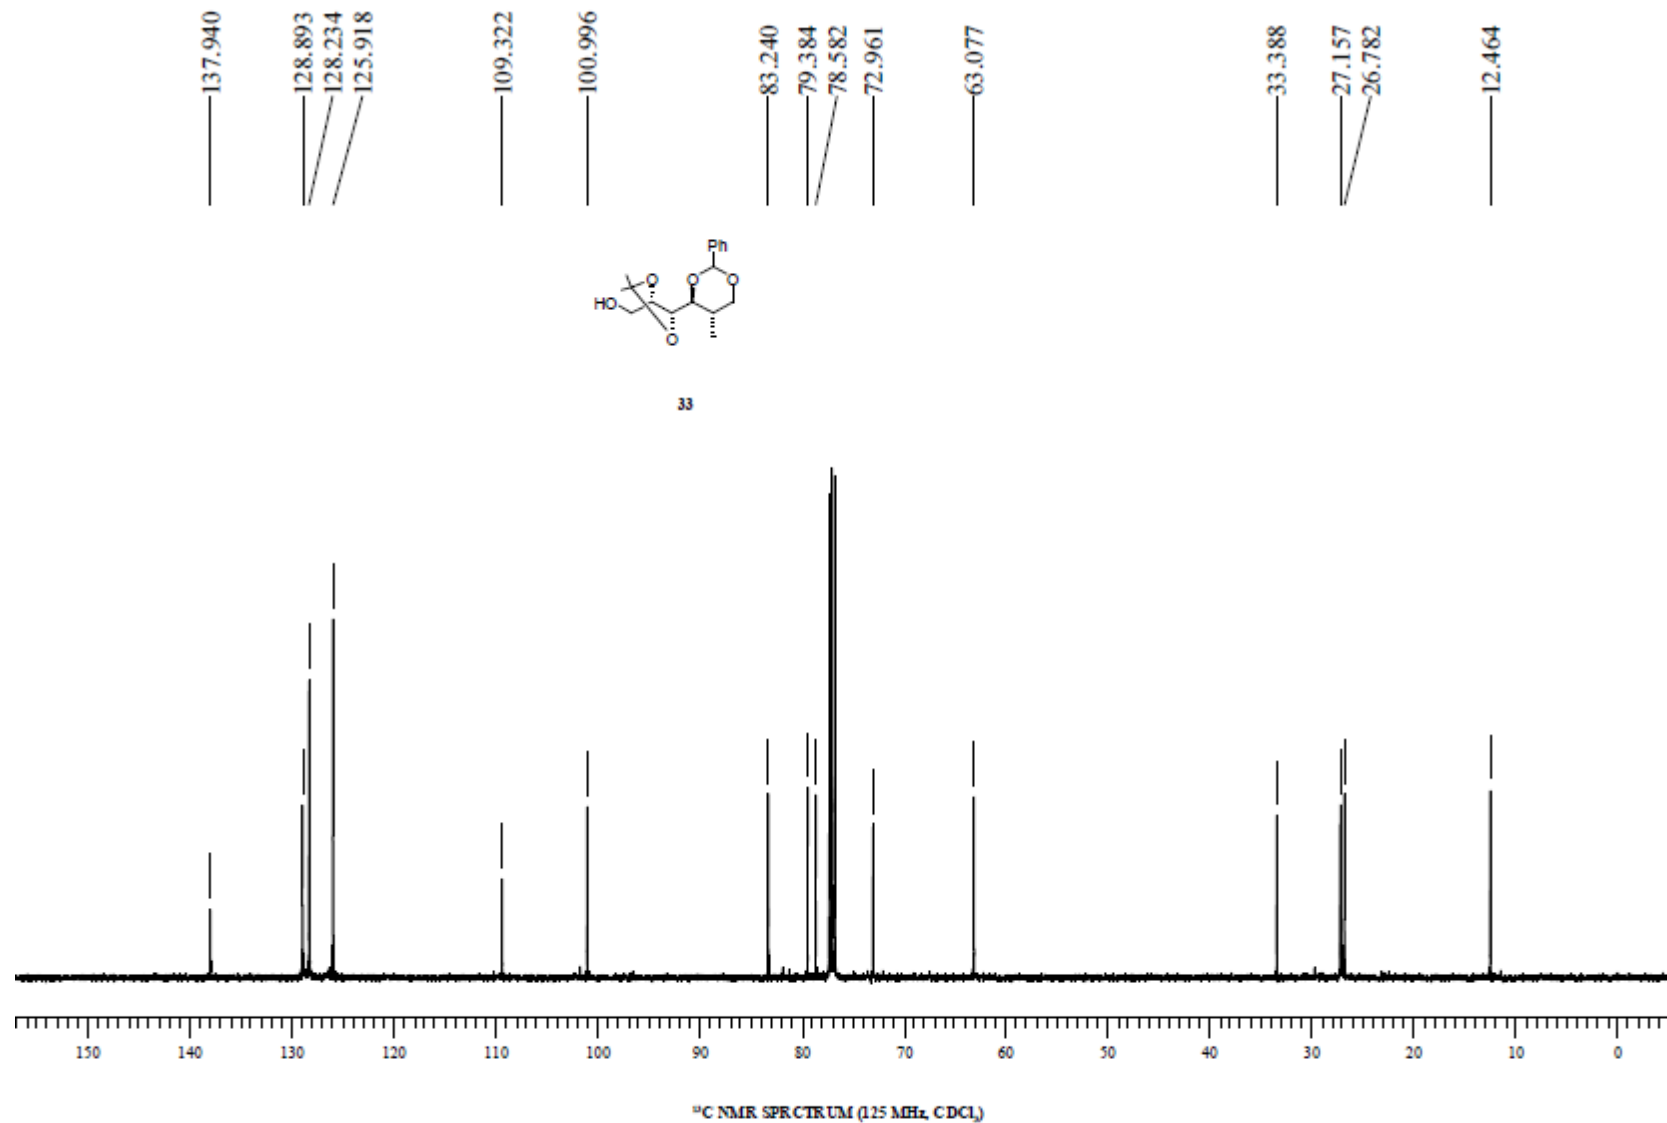

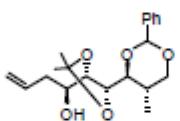

34

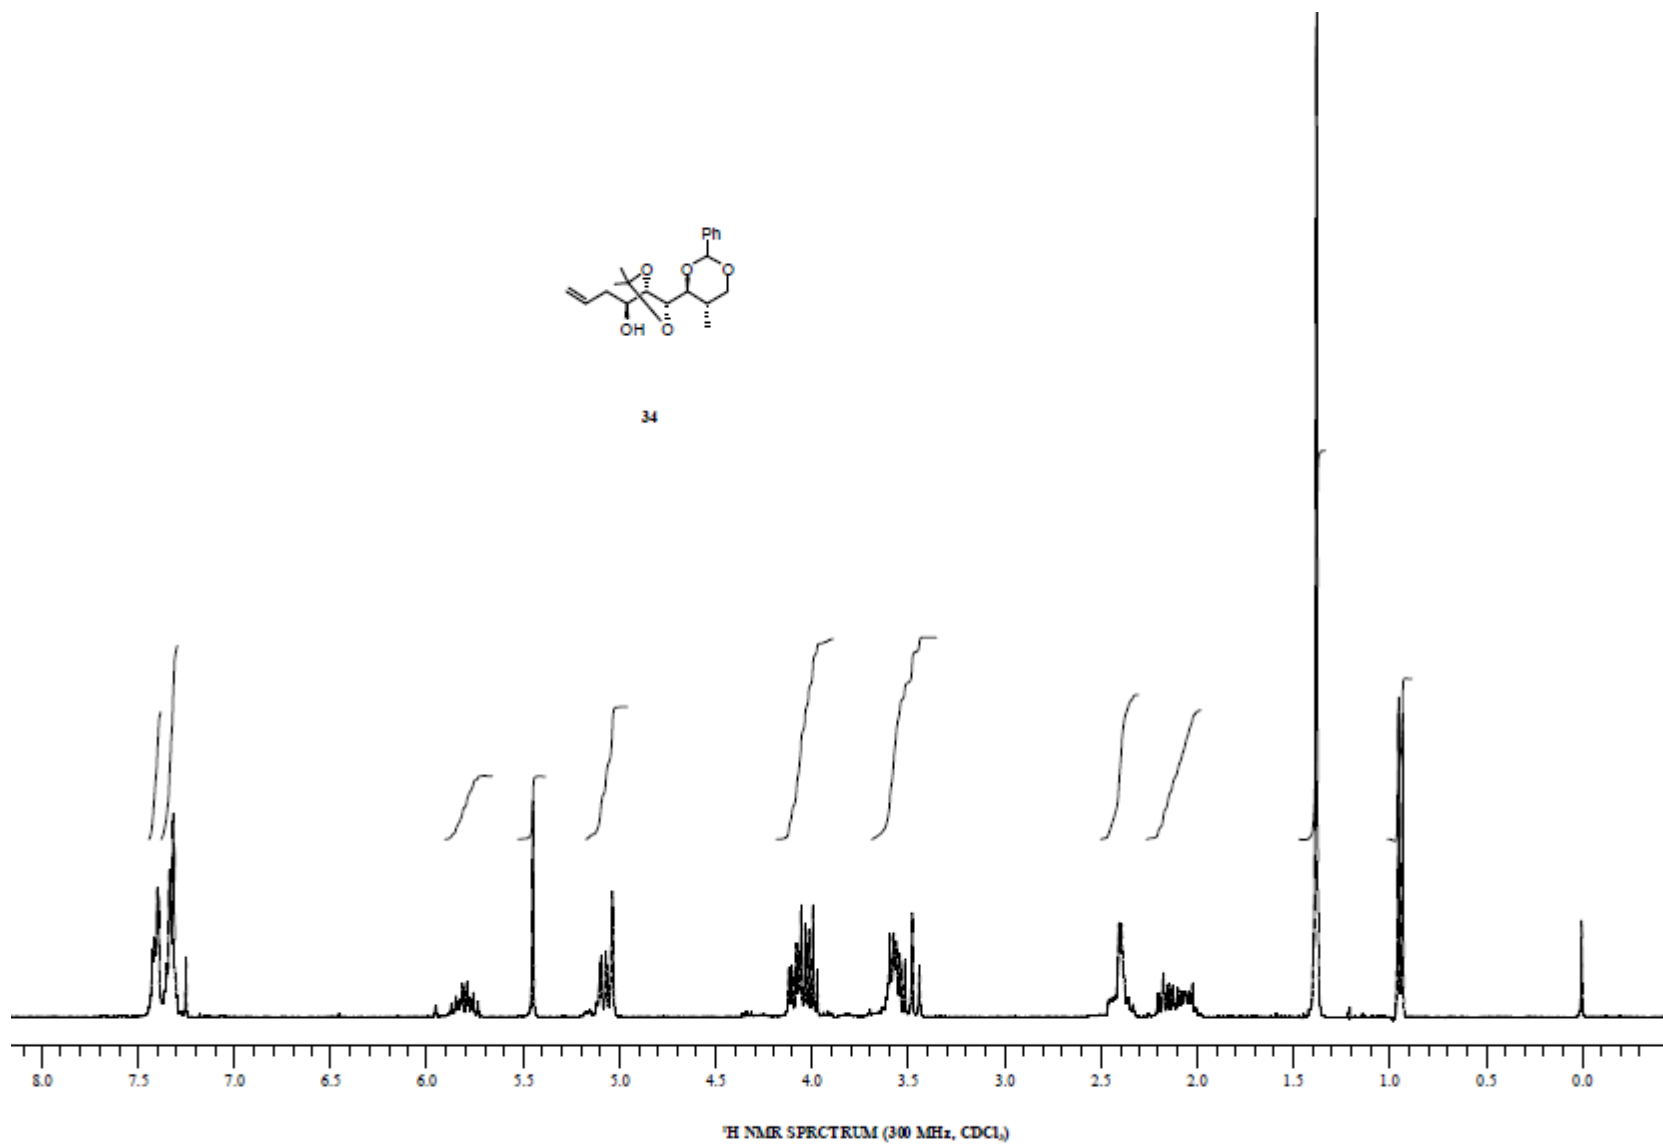

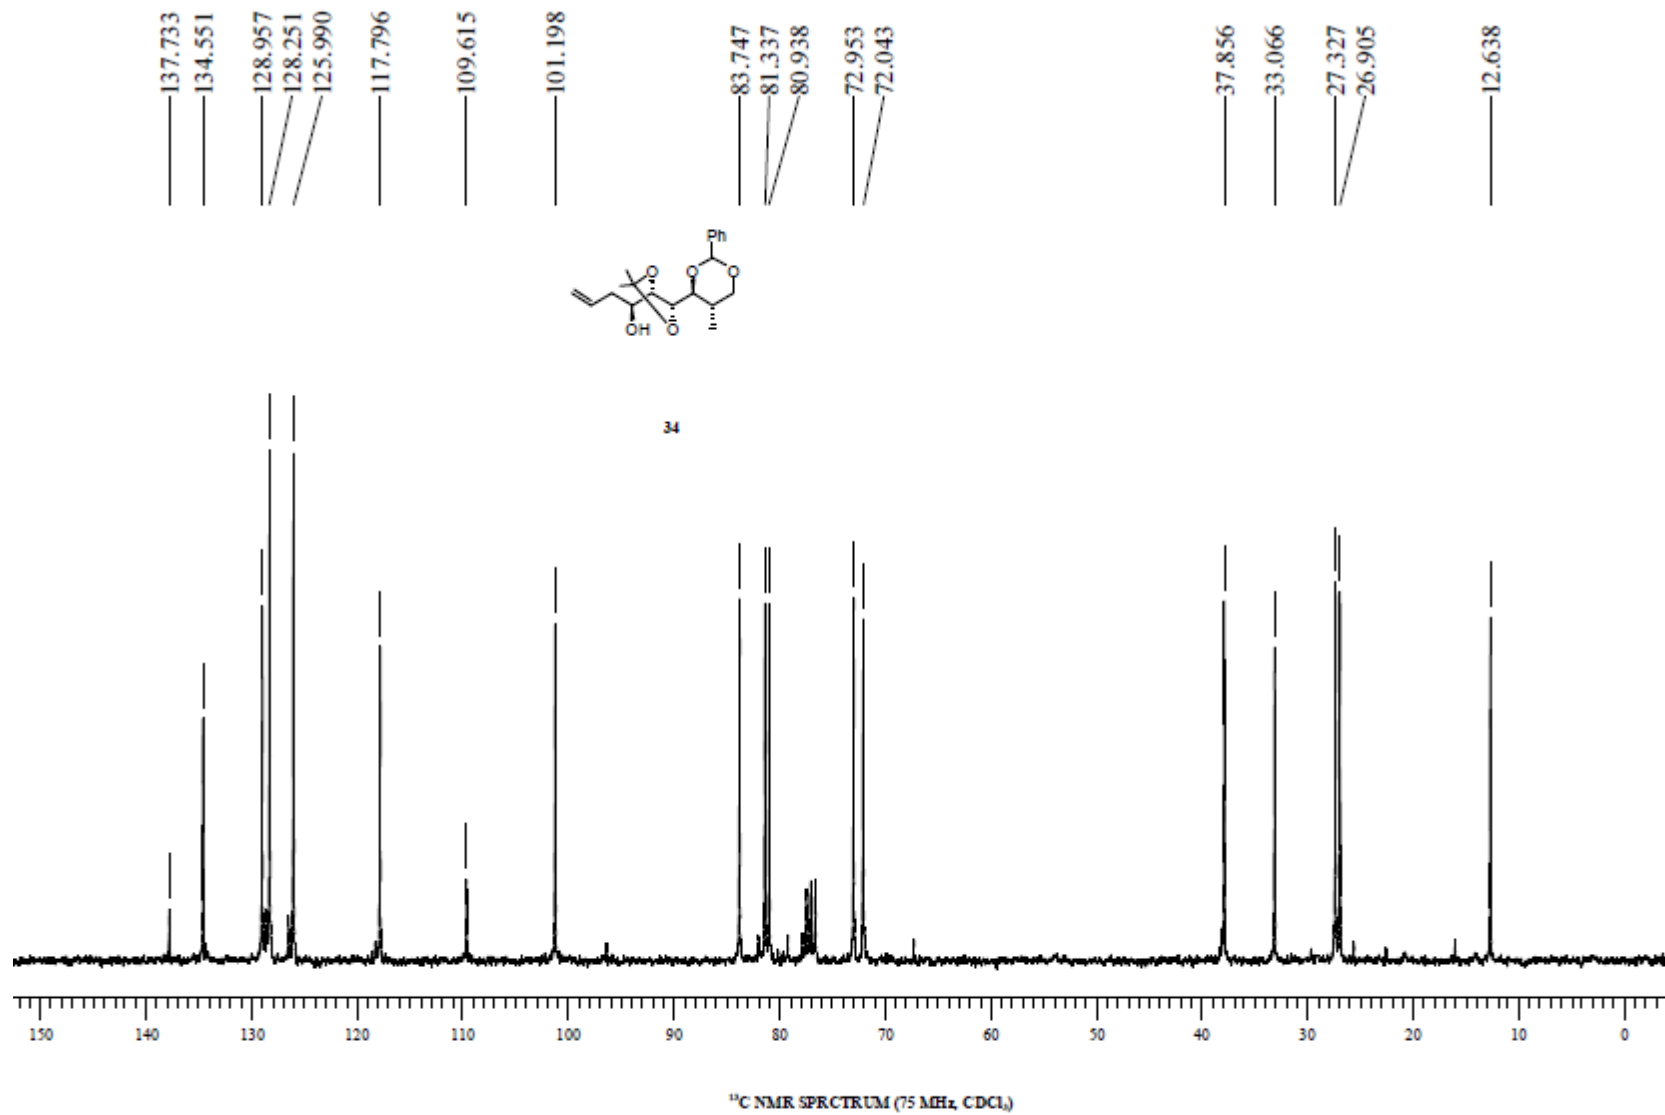

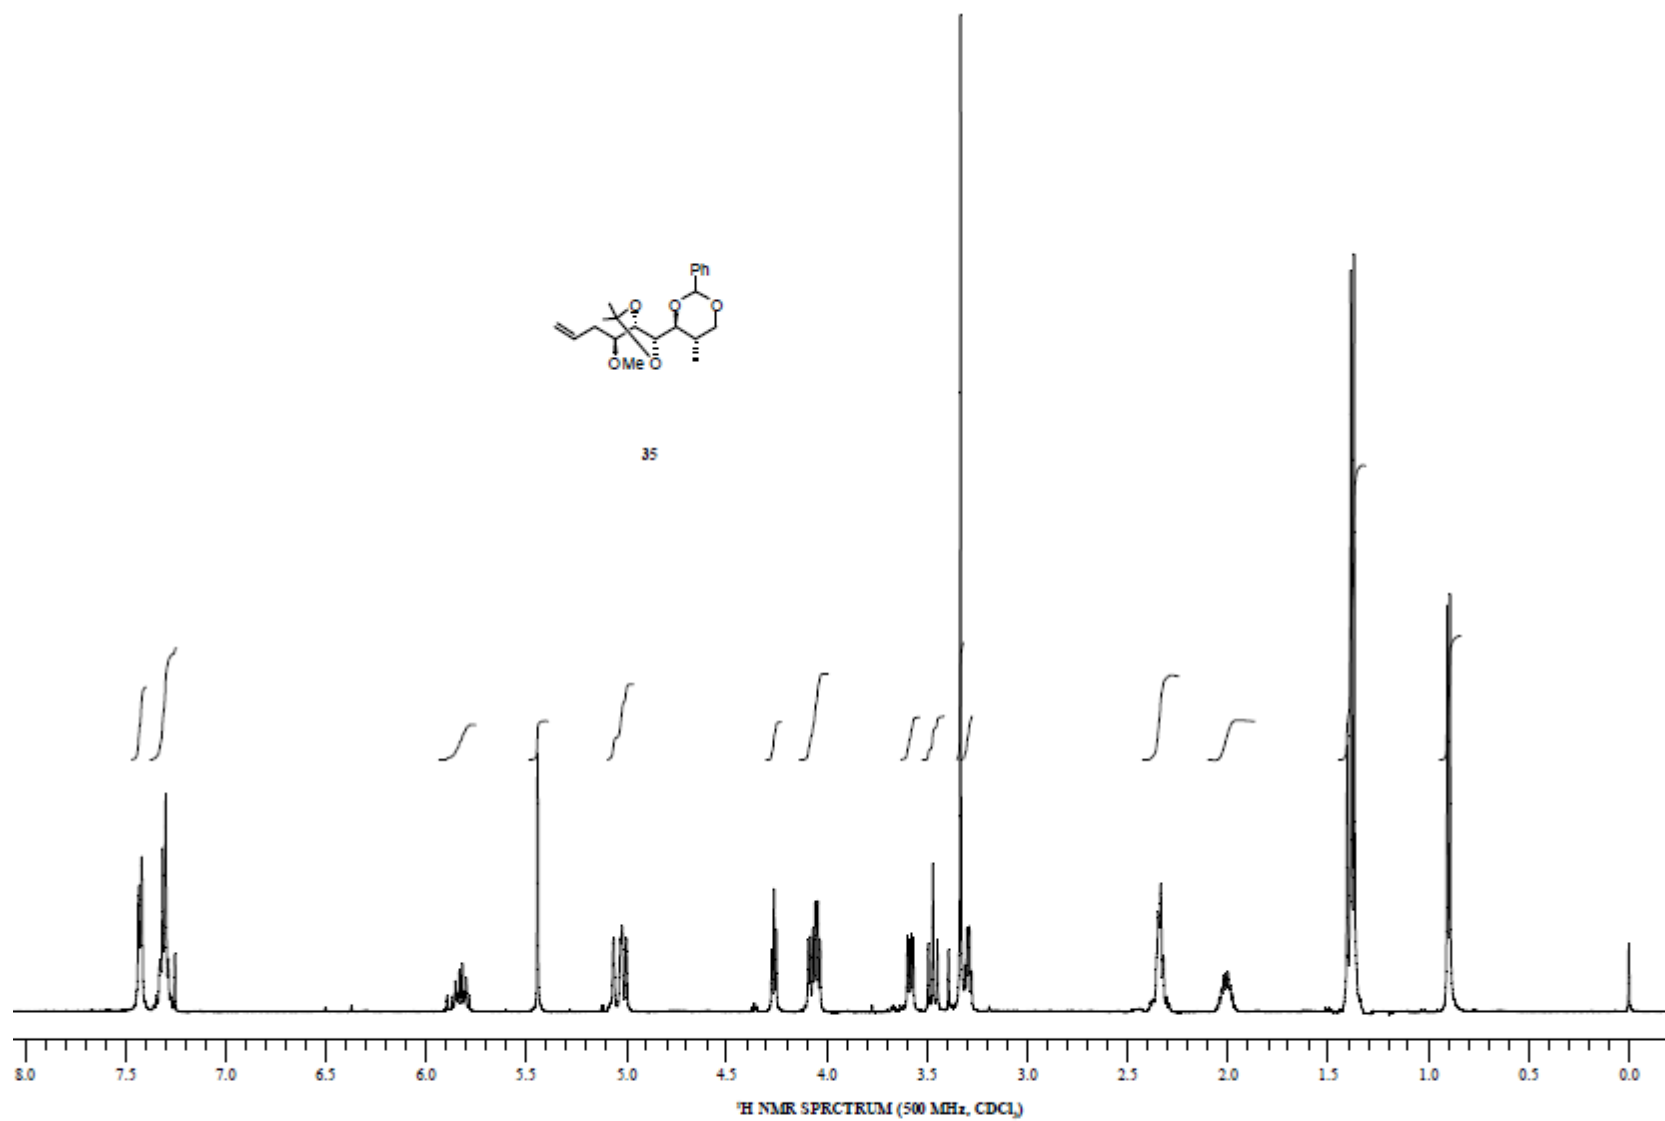

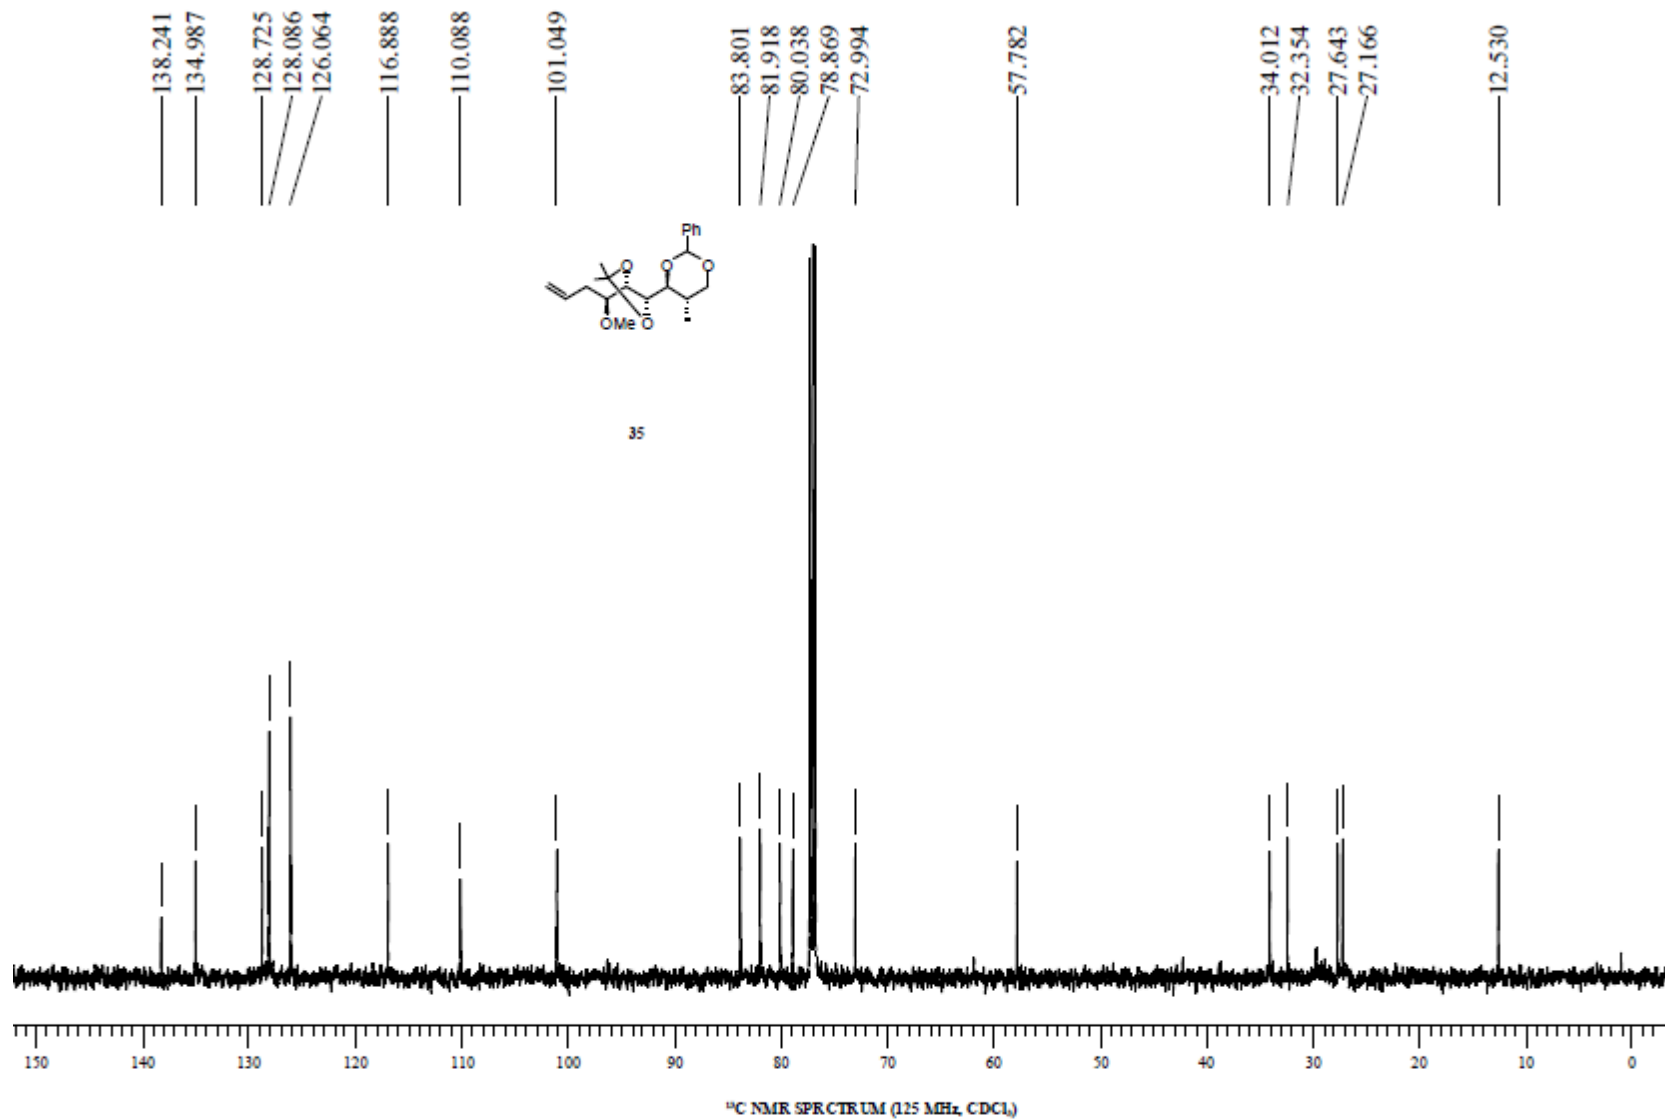

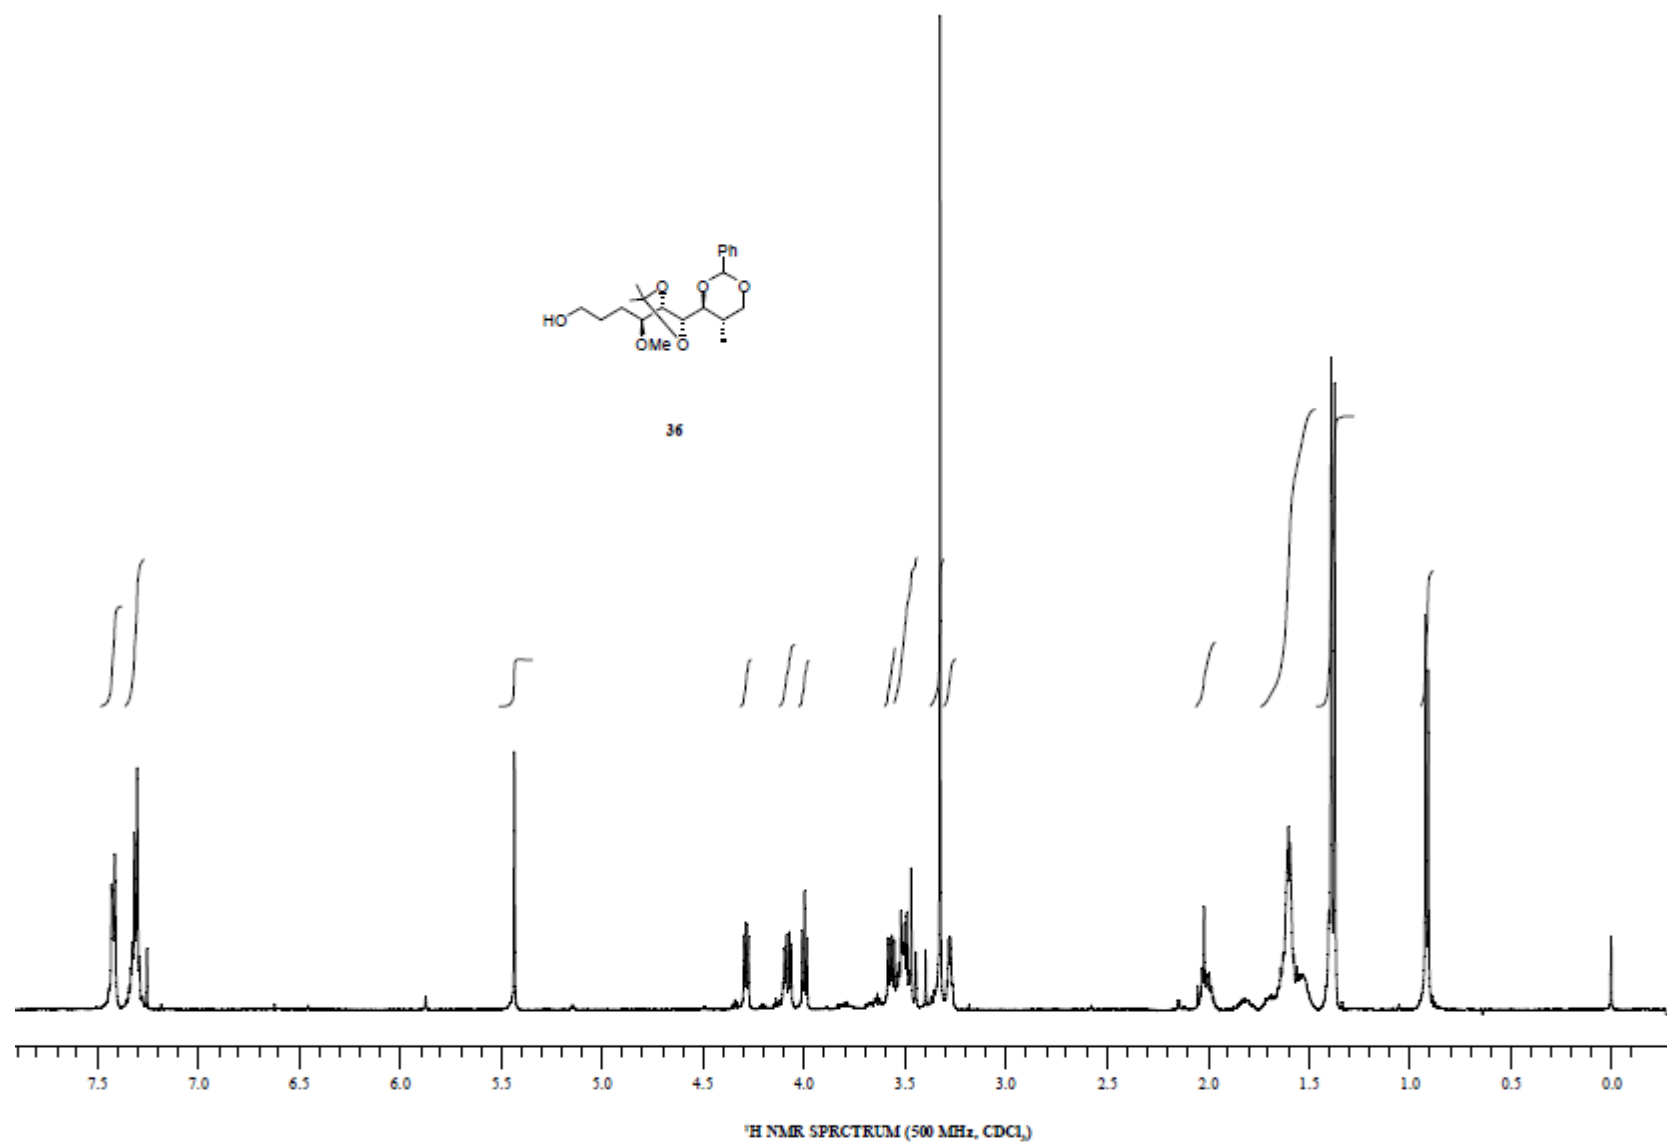



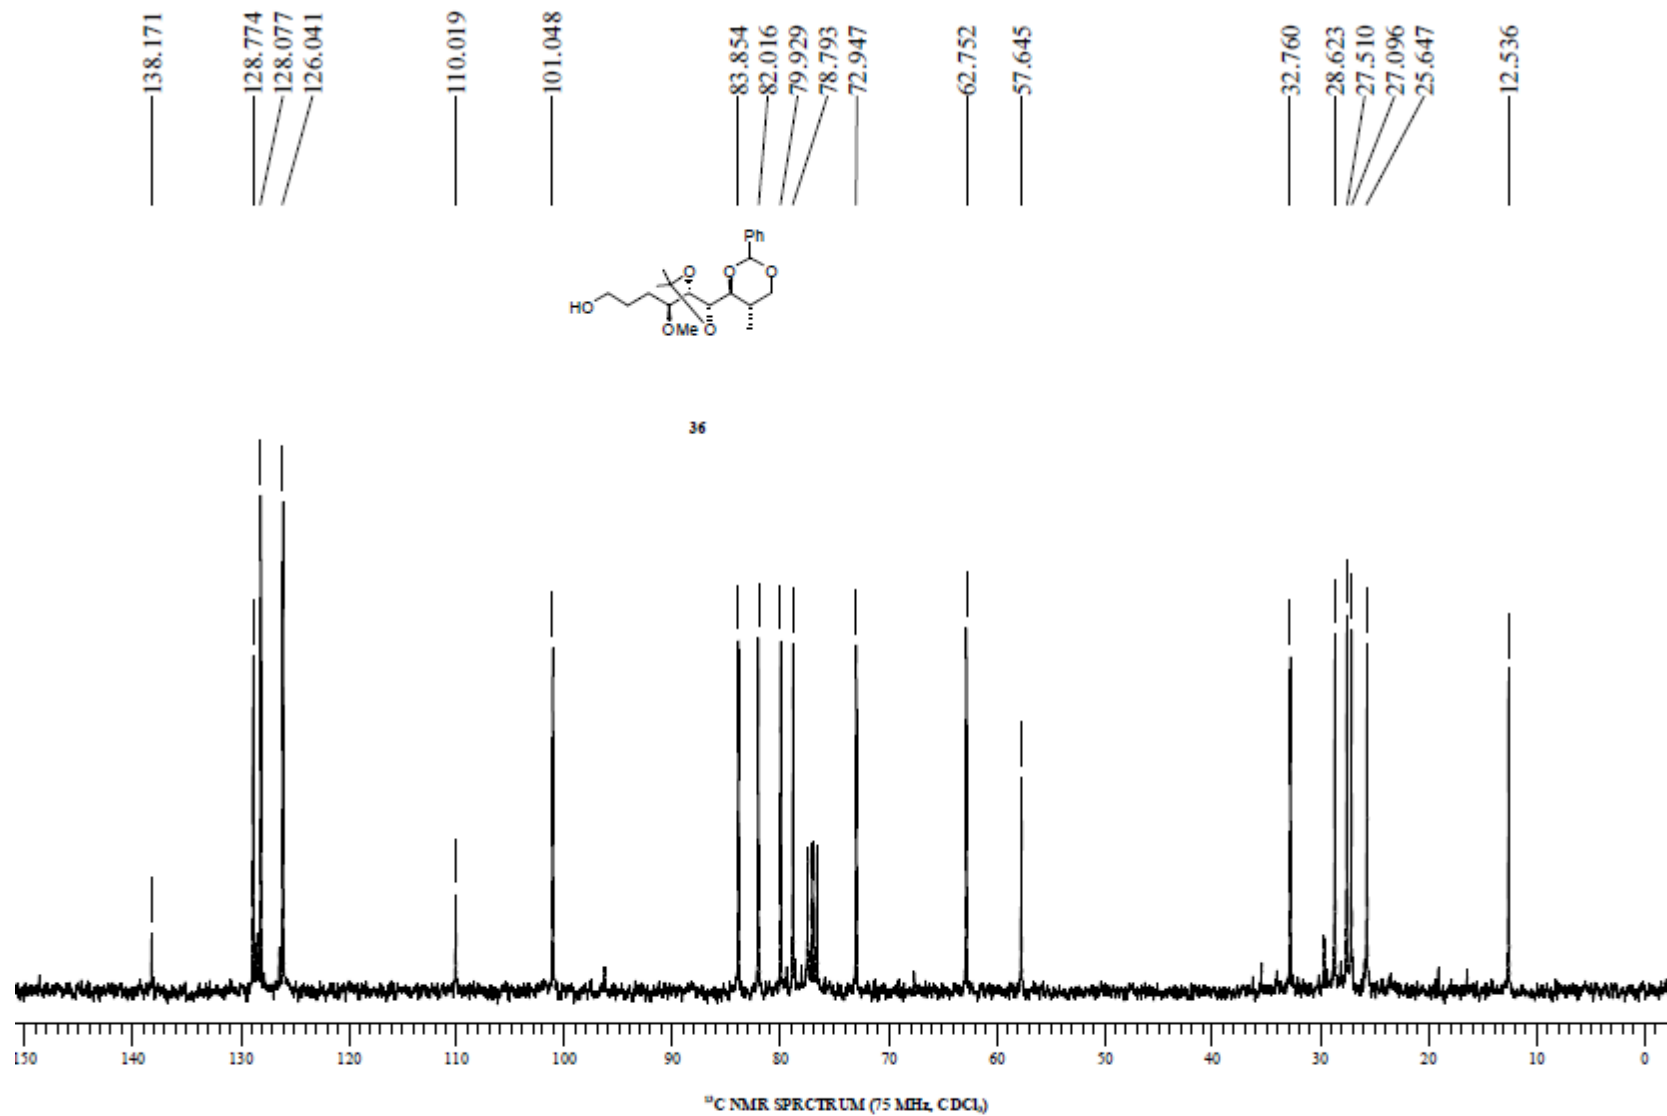

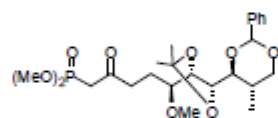

11

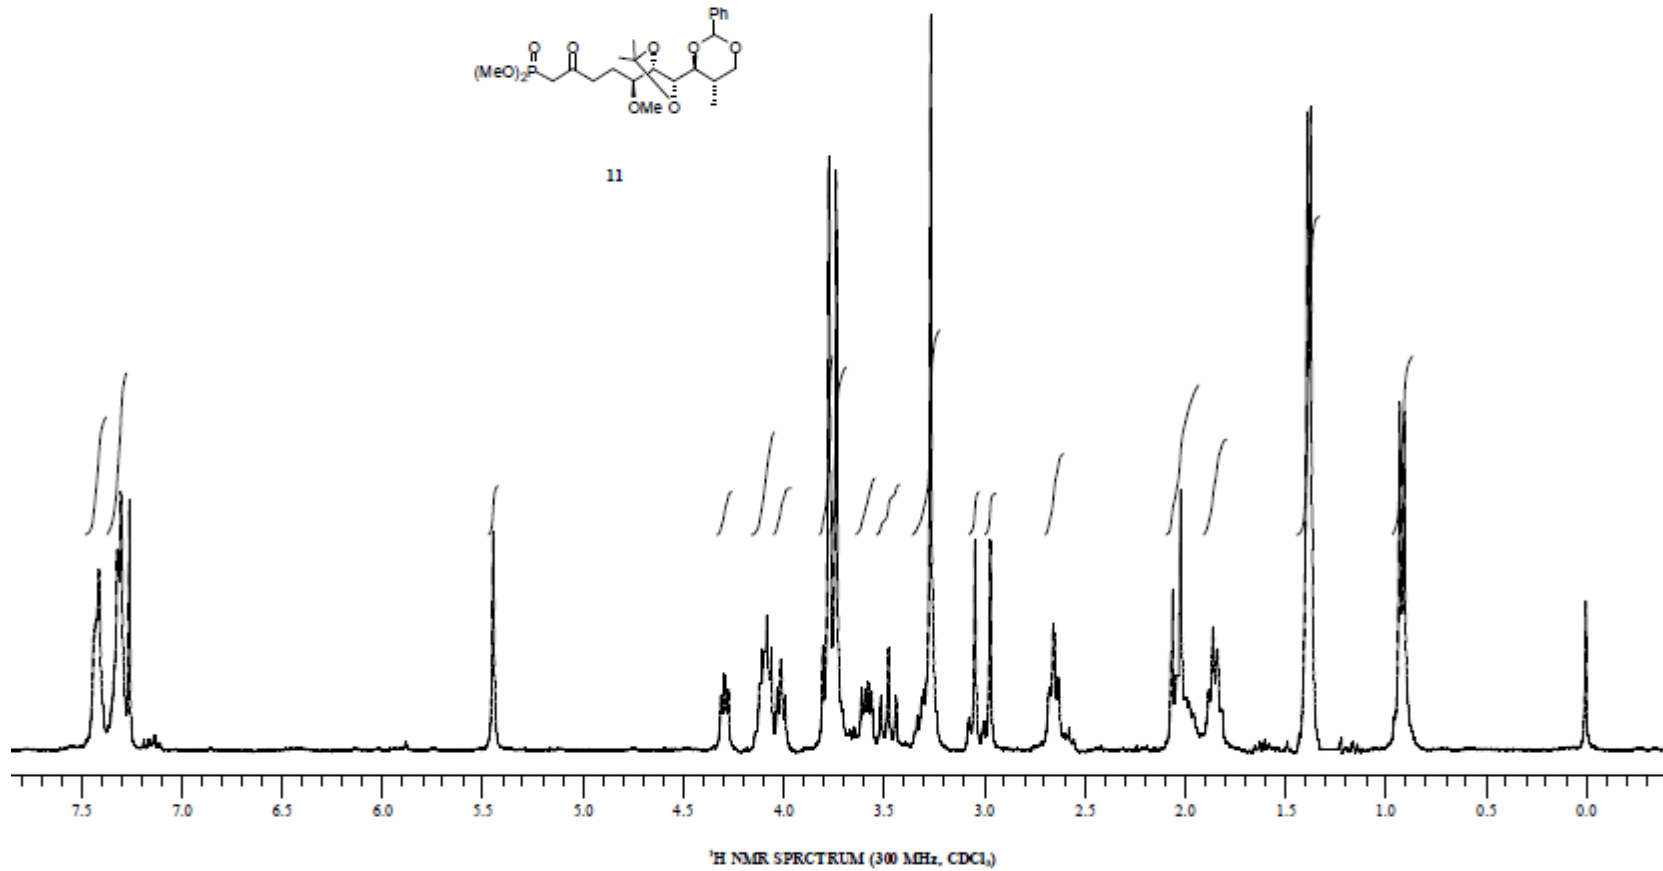

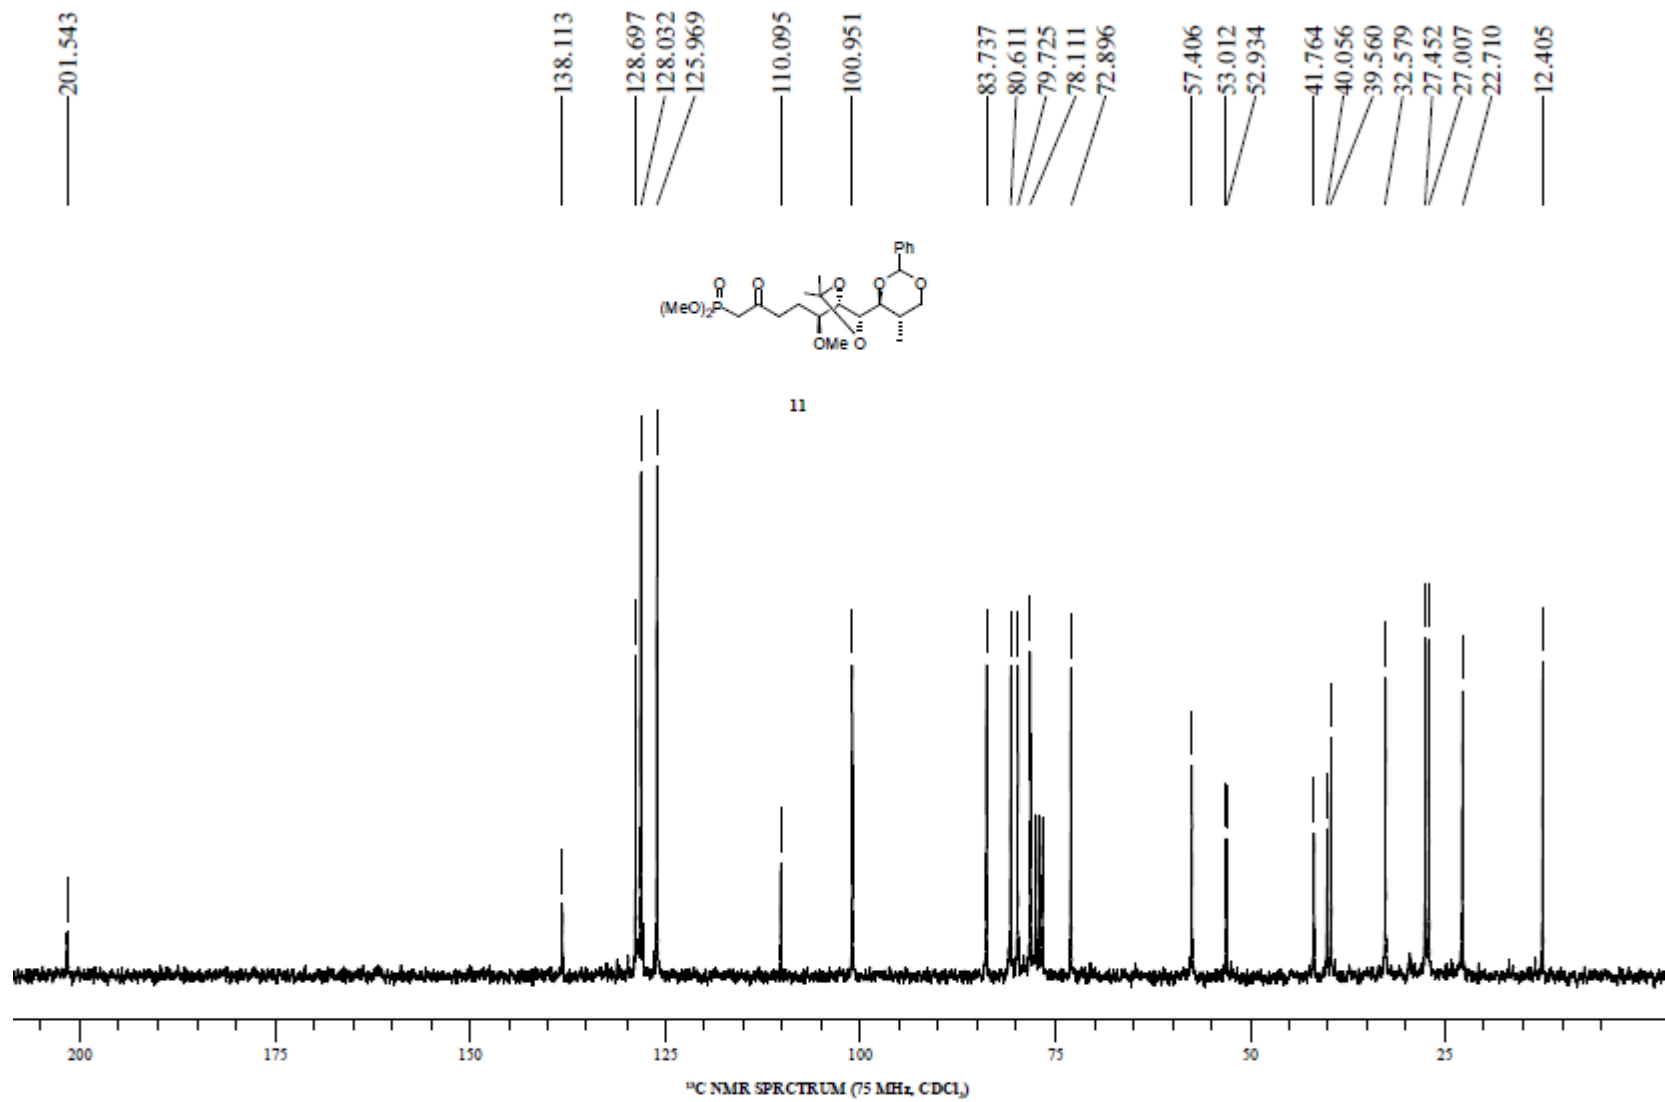

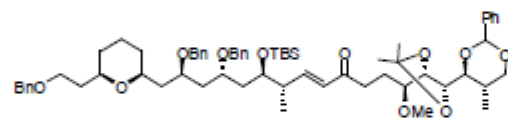

37

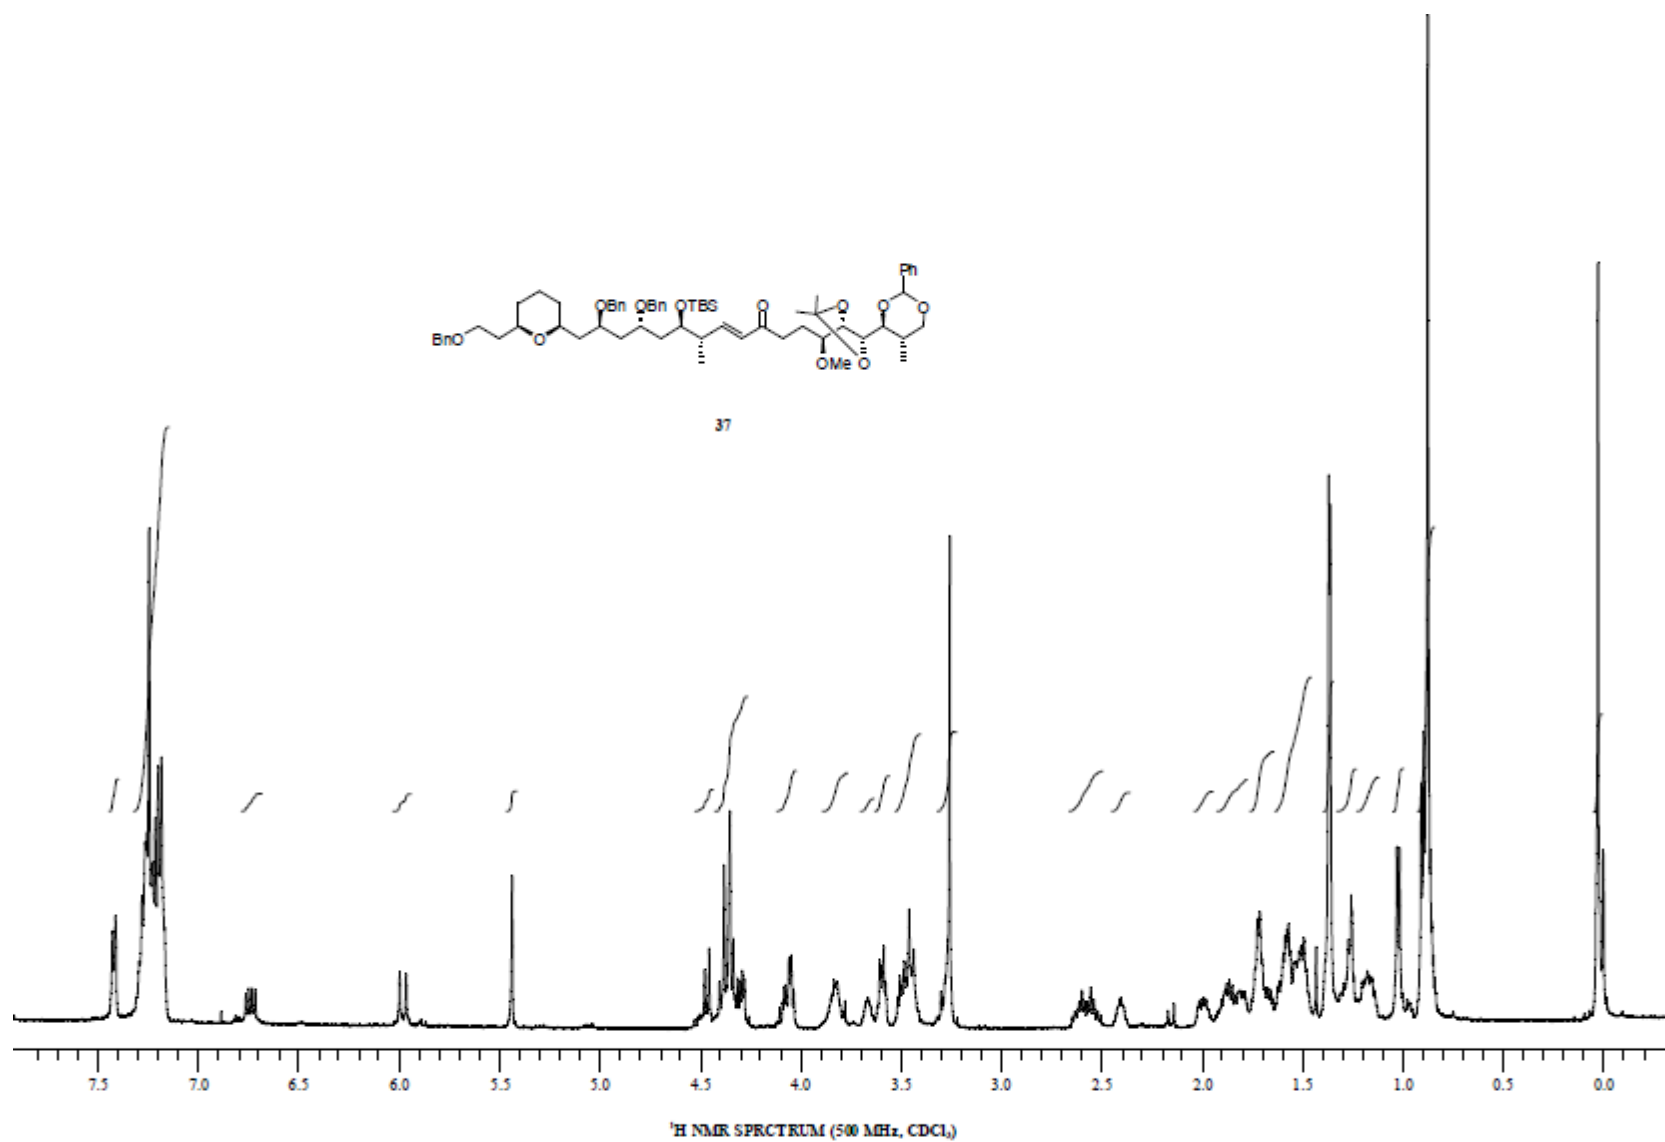

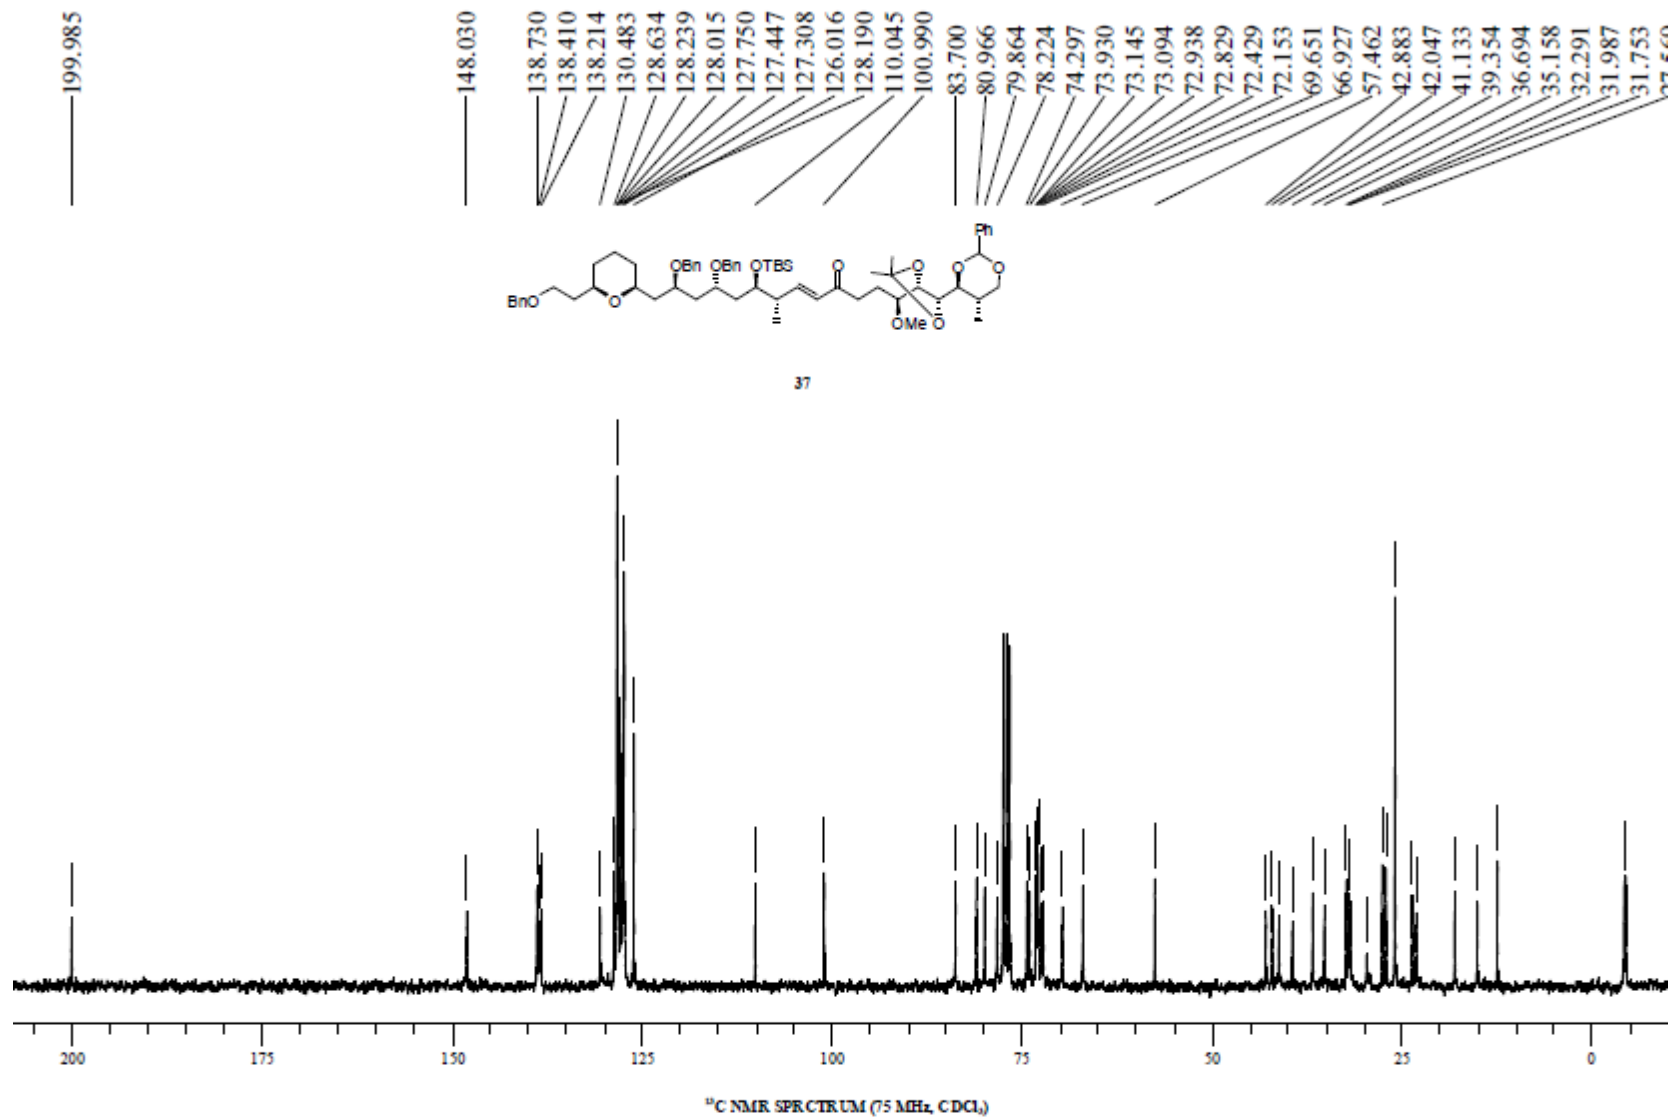



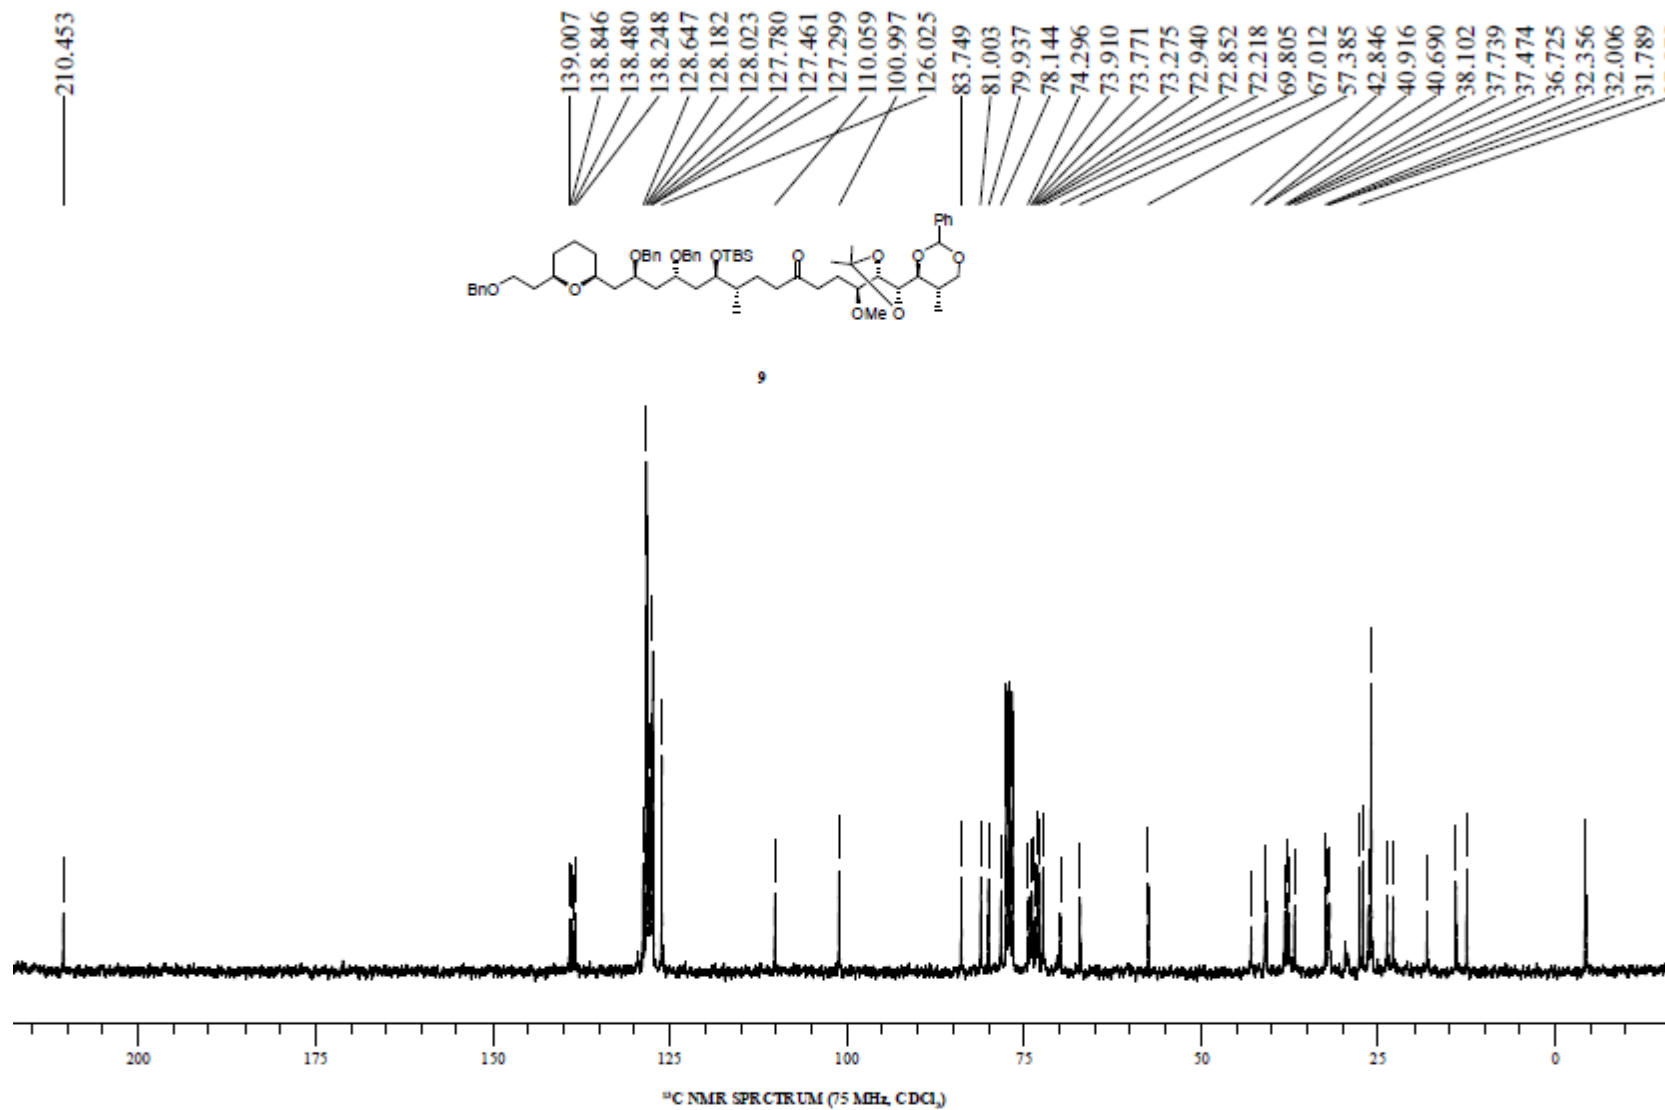

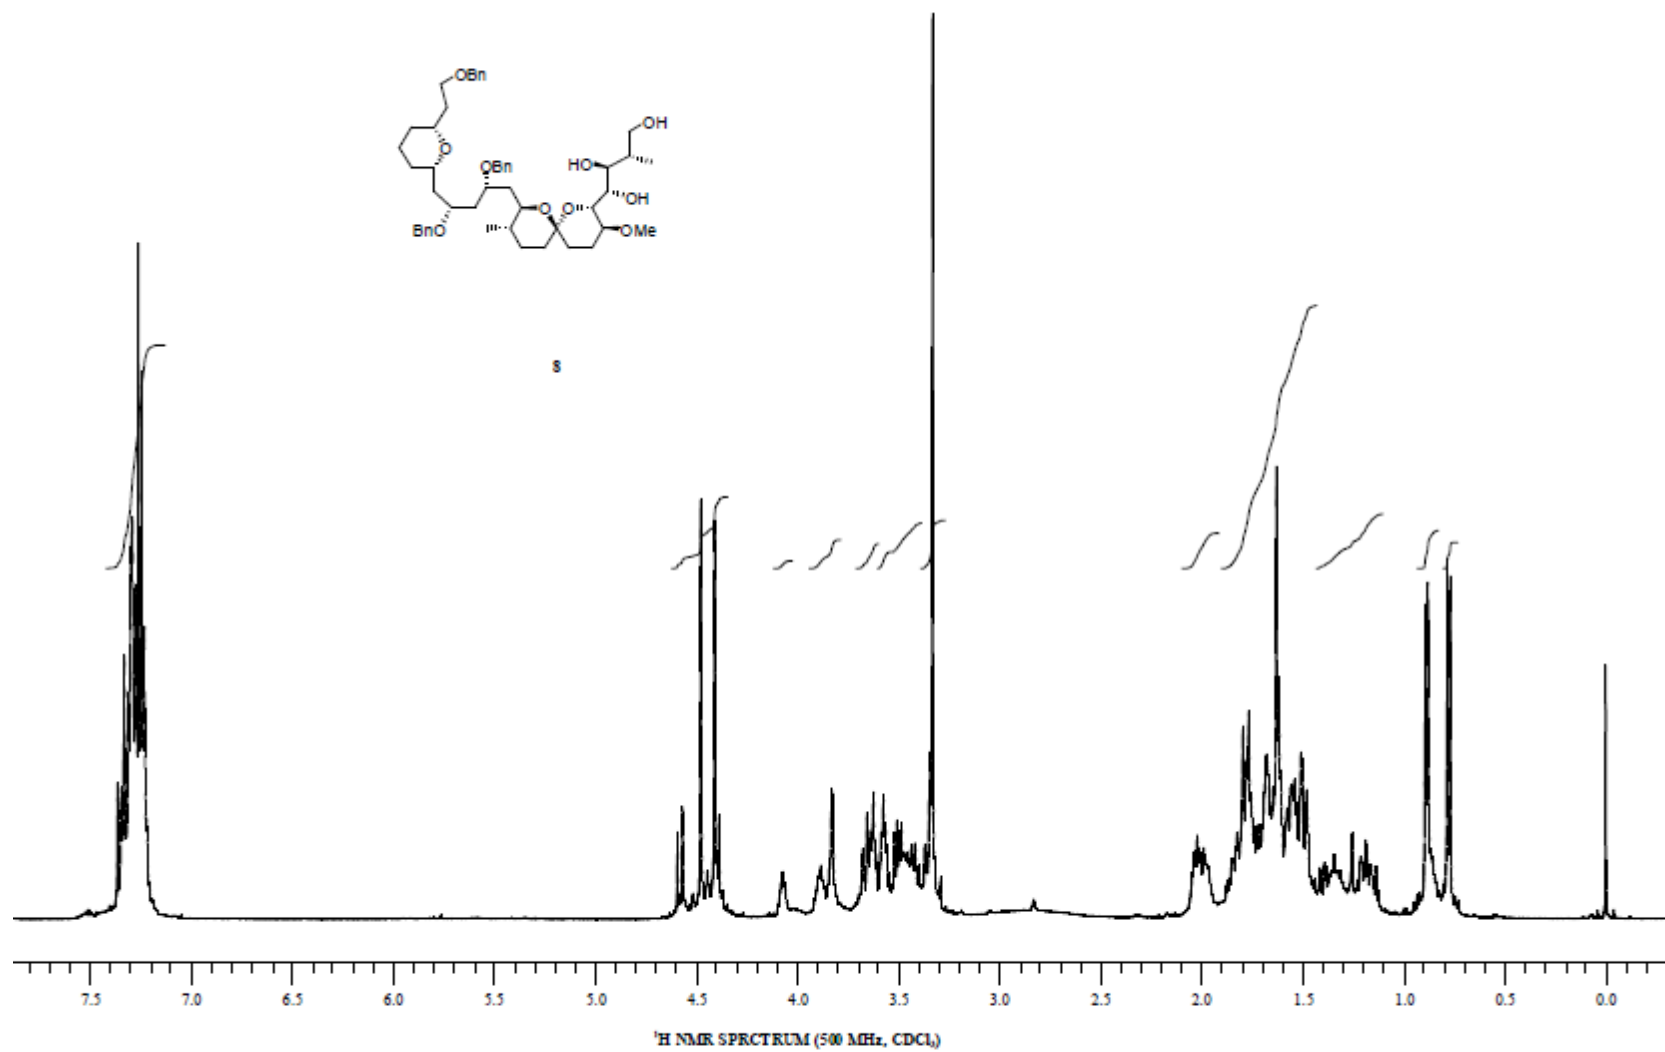



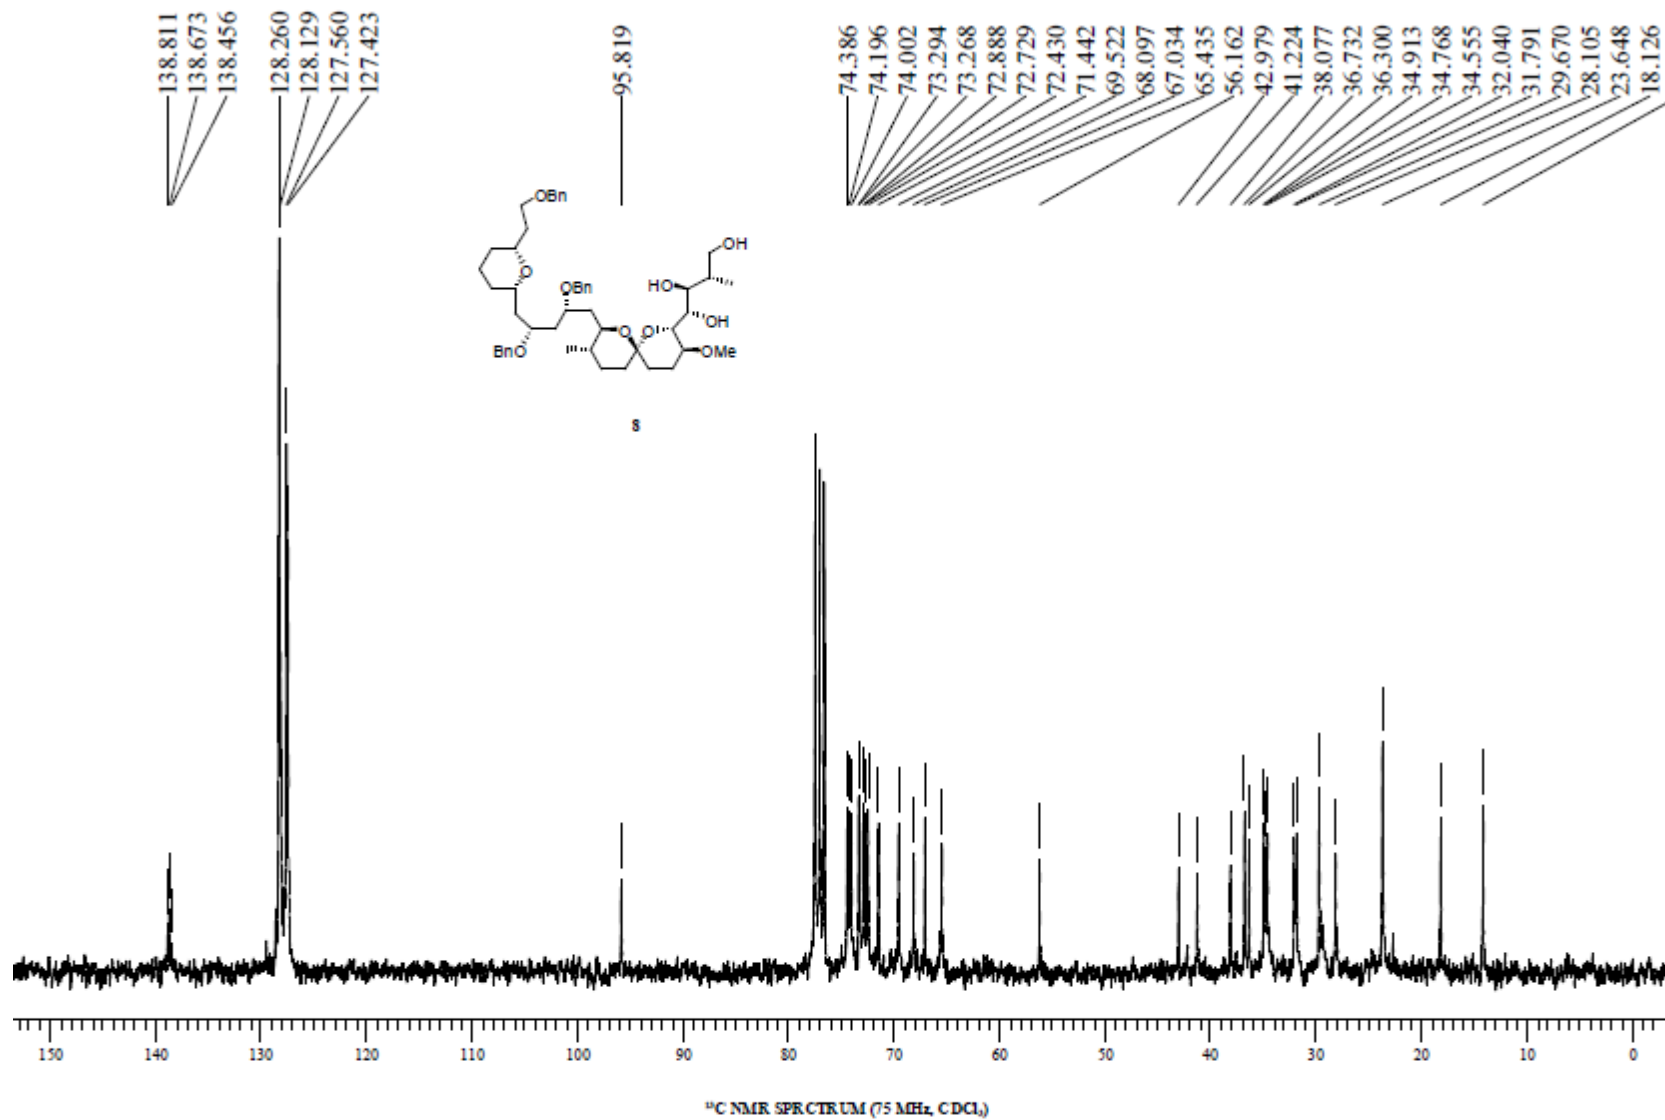

Supplement: c3ob41345d.pdf [file c3ob41345d.pdf]
